# Supplementary material
Source: publisher figshare collection journal article supplement (https://acs.figshare.com/ndownloader/files/4069696)
Supplement: Supplementary file 1 [file 4069696]

# Asymmetric Methallylation of Ketones Catalyzed by a Highly Active Organocatalyst 3,3'-F<sub>2</sub>-BINOL

*Yongda Zhang\*, Ning Li, Bo Qu, Shengli Ma, Heewon Lee, Nina C. Gonnella, Joe Gao, Wenjie Li, Zhulin Tan, Johnathan T. Reeves, Jun Wang, Jon C. Lorenz, Guisheng Li, Diana C. Reeves, Ajith Premasiri, Nelu Grinberg, Nizar Haddad, Bruce Z. Lu, Jinhua J. Song, Chris H. Senanayake*

*Chemical Development, Boehringer-Ingelheim Pharmaceuticals, Inc., 900 Ridgebury Road, Ridgefield, Connecticut 06877*

E-mail: [yongda.zhang@boehringer-ingelheim.com](mailto:yongda.zhang@boehringer-ingelheim.com)

## Supporting Information

### Table of Contents

|                                                                                                |       |
|------------------------------------------------------------------------------------------------|-------|
| General-----                                                                                   | SI-2  |
| Synthesis of ( <i>S</i> )-3,3'-difluoro-1,1'-binaphthyl-2,2'-diol 7-----                       | SI-3  |
| Synthesis of 5,5-dimethyl-2-(2-methylallyl)-1,3,2-dioxaborinane 4 -----                        | SI-4  |
| Catalyst screen results-----                                                                   | SI-5  |
| Allylation of 11a catalyzed by 3,3'-Br <sub>2</sub> -BINOL and 3,3'-F <sub>2</sub> -BINOL----- | SI-6  |
| General procedure for the asymmetric methallylation of ketones-----                            | SI-6  |
| Synthesis of enantioenriched 1-----                                                            | SI-14 |
| <sup>1</sup> H and <sup>13</sup> C NMR Spectra for all new compounds-----                      | SI-18 |
| Chiral HPLC traces for methallylation-----                                                     | SI-44 |
| X-Ray crystallographic data for compound 7-----                                                | SI-63 |

## General Methods.

All reactions were carried out under an atmosphere of argon or nitrogen in dry glassware with magnetic stirring. Commercially available *n*-BuLi, MOMCl, THF, NFSI (N-fluorobenzenesulfonimide), anhydrous *t*-BuOH and *t*-AmOH were received and used without any further purification. Ketones **11j**,<sup>1</sup> **11k**,<sup>1</sup> **11p**<sup>2</sup> were synthesized according to literature procedure. Column chromatography was performed on silica gel 60 (230-400 mesh). Thin layer chromatography was performed on 0.25 mm silica gel 60-F plates. Visualization was accomplished with UV light, KMnO<sub>4</sub>, aqueous ceric ammonium molybdate, or bromocresol green dips followed by heating. The stereochemistry of methallylation products were assigned by comparison with optical rotation of known compounds such as **12o**.

<sup>1</sup>H NMR and spectra were recorded on a 400 MHz spectrometer at ambient temperature. Data are reported as follows: chemical shift in parts per million ( $\delta$ , ppm) from an internal standard [tetramethylsilane (TMS) or deuterated chloroform (CDCl<sub>3</sub>)], multiplicity (s = singlet, d = doublet, t = triplet, q = quartet, m = multiplet, br = broad), integration, and coupling constant (Hz). <sup>13</sup>C NMR and spectra were recorded on a 400 MHz spectrometer at ambient temperature. Chemical shifts are reported in ppm from CDCl<sub>3</sub> taken as 77.0 ppm. Melting points are uncorrected. Optical rotations were measured on an Autopd<sup>®</sup> III automatic polarimeter.

### Synthesis of (*S*)-3,3'-difluoro-1,1'-binaphthyl-2,2'-diol **7**<sup>3</sup>

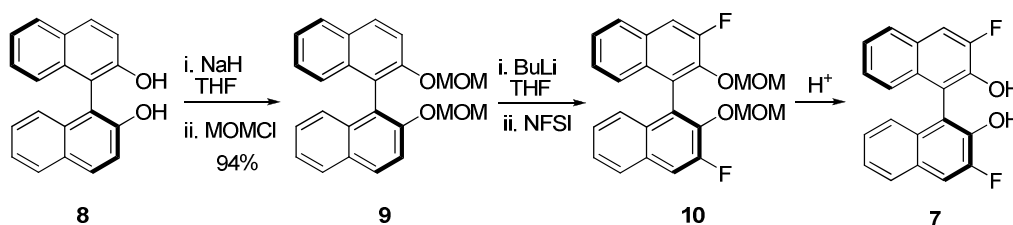

A dry and clean flask was charged with 60% NaH (10.48 g, 261.94 mmol, 2.5 equiv) under nitrogen followed by addition of 100 mL of THF. After the resulting suspension was cooled to 0 °C, a solution of (*S*)-1,1'-binaphthyl-2,2'-diol **8** (30 g, 104.78 mmol) in 200 mL of THF was added while maintaining the internal temperature below 5 °C. After 1 h, MOMCl (20.25 g, 251.46 mmol, 2.4 equiv) was added while maintaining the internal temperature below 10 °C. After the solution was stirred for 1 h at 0-5 °C, the reaction was quenched with water and extracted with EtOAc. The combined organic layers were washed with brine, dried over anhydrous Na<sub>2</sub>SO<sub>4</sub>. Removal of the solvent gave the product as a pale yellow solid, which was slurried in a mixture solvent (5% EtOAc in Hexane) to give 37 g of the product **9** as an off-white solid with 94% yield.

To a dry 500-mL 3-neck flask was charged **9** (10 g, 26.71 mmol) under nitrogen followed by addition of 100 mL of THF via a syringe. After the resulting solution was cooled to -15 °C, a solution of 2.5 M *n*-BuLi (25.64 mL, 64.10 mmol, 2.4 equiv) in hexane was added while maintaining the internal temperature below -10 °C. After complete addition, the mixture was kept at 0 °C for 1 h to give a thick suspension. The suspension was cooled to -70 °C. NFSI (21.03 g, 64.68 mmol, 2.42 equiv) in 100 mL of THF was added while maintaining the internal temperature < -69 °C. After complete addition, the resulting mixture was kept < -69 °C for 30 min. Then the mixture was allowed to warm up to room temperature. Water was added to quench the reaction followed by addition of EtOAc. The combined organic layers were washed with aq. NaHCO<sub>3</sub>, water and brine successively, and dried over anhydrous Na<sub>2</sub>SO<sub>4</sub>. Removal of the solvent under vacuum gave the crude product, which was purified by silica gel chromatography to give the product **10** as a liquid with 91% yield.

To a flask was charged **10** (6.0 g) and Amberlyst<sup>®</sup> ion-exchange resin 15 (6.0 g). After addition of 30 mL of THF and 30 mL of MeOH, the resulting mixture was heated at reflux for 3 h. After the mixture was cooled to room temperature, the solid was removed

by filtration. The crude product on removal of the solvent was purified on silica gel to give the pure product **7** as a white solid with 93% yield and > 99% ee.

$[\alpha]_D^{22} +22.9$  [ $c$  0.66,  $\text{CHCl}_3$ ]; Melting point: 177-179 °C;  $^1\text{H}$  NMR (600.02 MHz,  $\text{DMSO-}d_6$ ),  $\delta$  9.57 (s, 2H), 7.89(d,  $J$  = 8.4 Hz, 2H), 7.85 (d,  $J$  = 12 Hz, 2H), 7.33 (t,  $J$  = 7.8 Hz, 2H), 7.20 (t,  $J$  = 7.8 Hz, 2H), 6.91 (d,  $J$  = 8.4 Hz, 2H);  $^{13}\text{C}$ -NMR (150.92 MHz,  $\text{DMSO-}d_6$ )  $\delta$ , 152.1, 143.1, 130.6, 127.6, 127.4, 125.5, 124.2, 123.8, 118.0, 111.7;  $^{19}\text{F}$  NMR ( $\text{CDCl}_3$ ),  $\delta$  -135.1 (m, 1F). HRMS (ES pos.):  $m/z$  calcd for  $\text{C}_{20}\text{H}_{13}\text{F}_2\text{O}_2^+$  ( $\text{M} + \text{H}^+$ ): 323.0878, found: 323.0871; Chiral HPLC conditions: Chiralpak OD-H, 4.6 x 250 mm; 75:25 heptane/2-propanol, 1.2 mL/min, 220 nm, (*R*)-**7**,  $t$  = 5.89 min, (*S*)-**7**,  $t$  = 8.59 min.

### Synthesis of 5,5-Dimethyl-2-(2-methylallyl)-1,3,2-dioxaborinane **4**

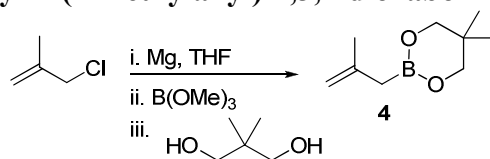

To a dry flask was charged Mg turnings (12.0 g, 497 mmol) and THF (350 mL) under argon followed by addition of 1.2 M DIBAL-H in heptane (8.28 mL, 0.03 equiv). The solution was left for 1 h and gradually became grey. 3-chloro-2-methylprop-1-ene (30 g, 331 mmol) was added to the flask while maintaining the temperature between 20-25 °C. After the complete addition, the mixture was stirred for 2 h at that temperature. The solution was titrated with bi-pyridine as indicator.<sup>4</sup> The concentration is about 0.62 M.

To a dry flask was charged the Grignard reagent (248 mmol, 400 mL) prepared above and MTBE (200 mL) under nitrogen. After the mixture was cooled to -60 °C (dry-ice bath),  $\text{B(OMe)}_3$  (25.8 g, 248 mmol, 1 equiv) was added while maintaining the internal temperature below -60 °C. The resulting solution was stirred at -50 to -60 °C for 30 min, and then slowly warm to 0 °C over 30 min.  $\text{AcCl}$  (17.5 g, 223.2 mmol, 0.9 equiv) was charged while controlling the temperature below 5 °C. After that, the reaction mixture was allowed to warm to room temperature and then 3,3-dimethyl-propane-1,3-diol (23.0 g, 223 mmol, 0.9 equiv) was charged into the flask in one portion. The resulting reaction mixture was stirred at 23 °C overnight. Dioxane (32.78 g, 372 mmol, 1.5 equiv) was added to the mixture. After 2 h, the solid was filtered off through a Celite pad, which was rinsed with MTBE (200 mL). The residue on removal of the solvent was diluted with hexane (100 mL). The solid was removed by filtration. The filtrate was concentrated and

purified by passing a short silica gel column with 10% MTBE in hexanes as elute or by distillation under vacuum to give the boronate **4**.

$^1\text{H}$  NMR (400 MHz,  $\text{CDCl}_3$ ):  $\delta$  4.66 (s, 1H), 4.62 (s, 1H), 3.61 (s, 4H), 1.77 (s, 3H), 1.67 (s, 2H), 0.96 (s, 6H);  $^{13}\text{C}$  NMR (100 MHz,  $\text{CDCl}_3$ ):  $\delta$  144.1, 109.4, 72.2, 31.6, 24.5, 21.8. HRMS (ES pos.):  $m/z$  calcd for  $\text{C}_9\text{H}_{18}\text{BO}_2^+$  ( $M + \text{H}^+$ ): 169.1400, found: 169.1371.

### Screen results of various substituted BINOLs.

To a dry and clean flask was charged ketone **3** (2 mmol) and substituted BINOL **C1-C16** (0.20 equiv) under  $\text{N}_2$  followed by addition of *t*-BuOH (0.30 g, 4.0 mmol, 2 equiv) and **4** (3 mmol, 1.5 equiv) via syringe. Then the mixture was stirred at 23 °C overnight. The er was determined on chiral HPLC. Chiral HPLC conditions: Chiralcel OJ-RH, 4.6 x 150 mm, 5  $\mu\text{m}$ , mobile phase A (acetonitrile), mobile phase B (0.1%  $\text{HCO}_2\text{H}$  in water, adjusted with  $\text{NH}_4\text{OH}$  to pH = 4.0), 52:48 A/B,  $\lambda$  = 220 nm, flow rate: 1.3  $\text{mL min}^{-1}$ . The samples for HPLC were diluted with MeOH.

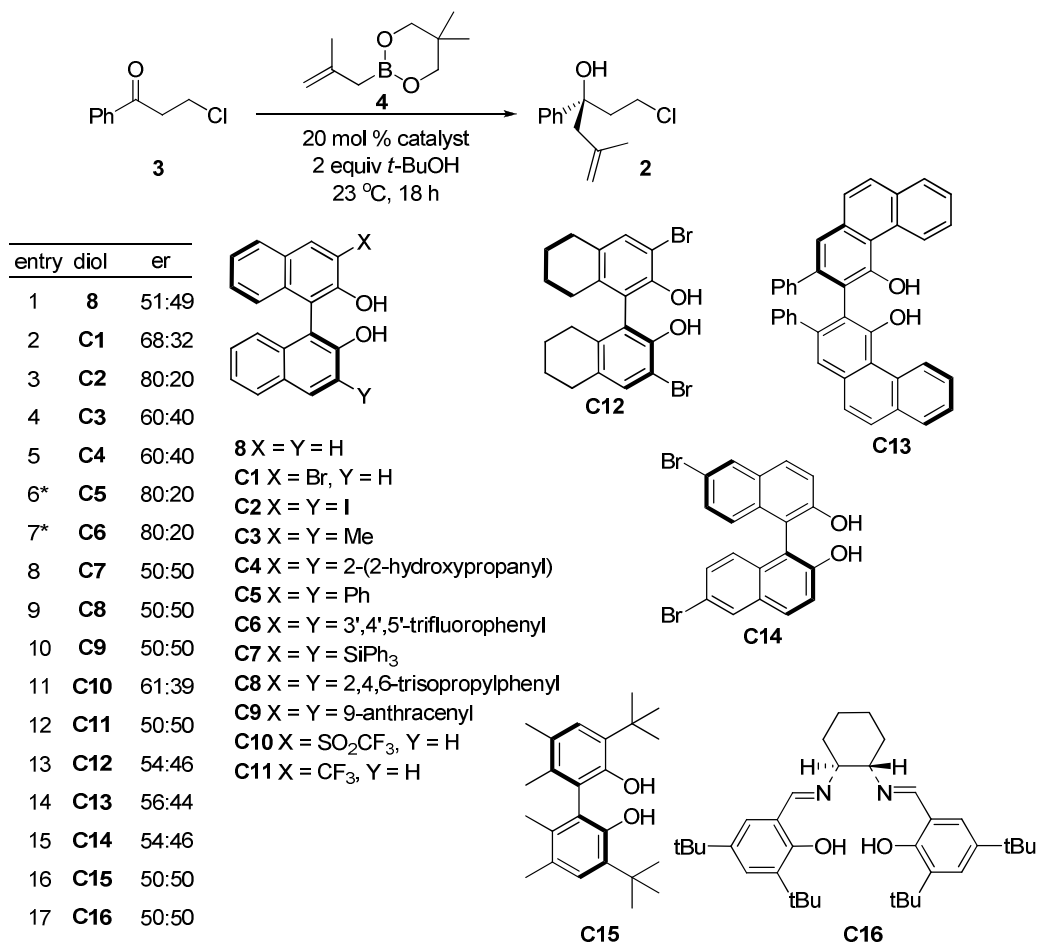

\* 3.0 equiv of **4** and 2.0 equiv of *t*-BuOH were used.

**Allylation of 11a catalyzed by 3,3'-Br<sub>2</sub>-BINOL 5 and 3,3'-F<sub>2</sub>-BINOL 7.**

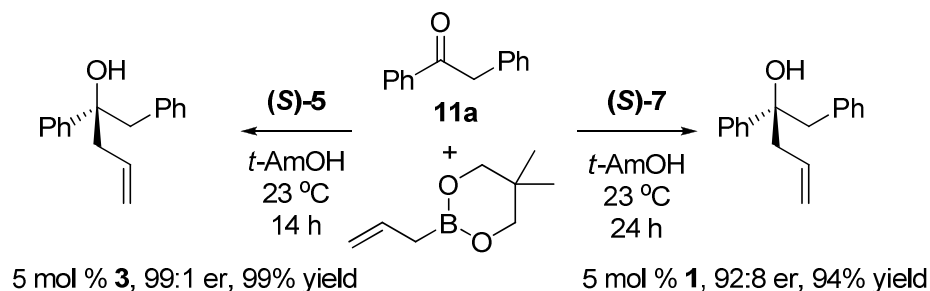

**General Procedure for the Asymmetric Methallylation of Ketones with 3,3'-F<sub>2</sub>-BINOL 7 as the organocatalyst**

To a dry and clean flask was charged ketone (2 mmol) and **7** (12.9 mg, 0.04 mmol, 0.05 equiv) under N<sub>2</sub> followed by addition of *t*-AmOH (0.29 g, 4.0 mmol, 2 equiv) and **4** (3 mmol, 1.5 equiv) via syringe. Then the mixture was stirred at the temperature as indicated in the table 2. The mixture was cooled to room temperature if the reaction was run at 40 °C. The reaction mixture was directly purified by flash chromatography (0-5% EtOAc in hexanes) on silica gel to yield the product.

**(*R*)-4-Methyl-1,2-diphenylpent-4-en-2-ol 12a**

The general procedure was applied to 1,2-diphenylethanone (0.39 g, 2.0 mmol) in the presence of 2 mol % **7**. The crude product was purified by column chromatography on silica gel (hexanes: EtOAc = 5:95) to give the product as an oil (0.49 g, 98 yield, 93:7 er). <sup>1</sup>H NMR (400 MHz, CDCl<sub>3</sub>): δ 7.35-7.14 (m, 8H), 6.97-6.95 (m, 2H), 4.82 (s, 1H), 4.67 (s, 1H), 3.16 (d, *J* = 13.4 Hz, 1H), 3.06 (d, *J* = 13.4 Hz, 1H), 2.76 (d, *J* = 13.6 Hz, 1H), 2.57 (d, *J* = 13.6 Hz, 1H), 2.26 (s, 1H), 1.37 (s, 3H); <sup>13</sup>C NMR (100 MHz, CDCl<sub>3</sub>): δ 145.8, 142.3, 136.6, 130.8, 127.8, 126.5, 125.7, 115.7, 75.6, 50.1, 49.9, 24.3. HRMS (ES pos.): *m/z* calcd for C<sub>18</sub>H<sub>19</sub><sup>+</sup> (M + H<sup>+</sup> - H<sub>2</sub>O): 235.1481, found: 235.1476. Optical Rotation: [α]<sub>D</sub><sup>22</sup> +21.2 (c = 1.13, CHCl<sub>3</sub>) for an enantiomerically enriched sample of 93:7 er.

Chiral HPLC conditions: Chiralcel OJ-RH, 4.6 x 150 mm, 5 μm, mobile phase A (acetonitrile), mobile phase B (0.1% HCO<sub>2</sub>H in water, adjusted with NH<sub>4</sub>OH to pH = 4.0), 52:48 A/B, λ = 220 nm, flow rate: 1.3 mL min<sup>-1</sup>. The samples for HPLC were diluted with MeOH. (*R*)-**12a**, *t*<sub>major</sub> = 8.57 min; (*S*)-**12a**, *t*<sub>minor</sub> = 8.06 min.

**(R)-1-(3-Methoxyphenyl)-4-methyl-2-phenylpent-4-en-2-ol 12b**

The general procedure was applied to 2-(3-methoxyphenyl)-1-phenylethanone (113 mg, 0.5 mmol). The crude product was purified by column chromatography on silica gel (hexanes: EtOAc = 5:95) to give the product (134 mg, 95% yield, 96:4 er). <sup>1</sup>H NMR (400 MHz, CDCl<sub>3</sub>): δ 7.37-7.26 (m, 4H), 7.23-7.17 (m, 1H), 7.09 (t, 1H, *J* = 7.9 Hz), 6.73-6.68 (m, 1H), 6.59 (d, 1H, *J* = 7.4 Hz), 6.43 (bs, 1H), 4.82 (bs, 1H), 4.68 (s, 1H), 3.63 (s, 3H), 3.15 (d, 1H, *J* = 13.4 Hz), 3.03 (d, 1H, *J* = 13.4 Hz), 2.76 (d, 1H, *J* = 13.6 Hz), 2.58 (d, 1H, *J* = 13.6 Hz), 2.27 (s, 1H), 1.39 (s, 3H); <sup>13</sup>C NMR (100 MHz, CDCl<sub>3</sub>): δ 159.1, 145.8, 142.3, 138.0, 128.7, 127.8, 126.4, 125.7, 123.2, 115.9, 115.7, 112.5, 75.6, 55.0, 50.1, 50.0, 24.3. HRMS (ES pos.): *m/z* calcd for C<sub>19</sub>H<sub>26</sub>NO<sub>2</sub> (M + NH<sub>4</sub><sup>+</sup>): 300.1958, found: 300.1954. Optical Rotation: [α]<sub>D</sub><sup>22</sup> +21.1 (*c* = 0.77, CHCl<sub>3</sub>) for an enantiomerically enriched sample of 96:4 er.

Chiral HPLC conditions: Chiralcel OJ-RH, 4.6 x 150 mm, 5 μm; mobile phase A (acetonitrile), mobile phase B (0.1% HCO<sub>2</sub>H in water, adjusted with NH<sub>4</sub>OH to pH = 4.0), 52:48 A/B, λ = 220 nm, flow rate: 1.3 mL min<sup>-1</sup>. The samples for HPLC were diluted with MeOH. (*R*)-**12b**, *t*<sub>major</sub> = 7.15 min; (*S*)-**12b**, *t*<sub>minor</sub> = 6.64 min

**(R)-2-(2-Methoxyphenyl)-4-methyl-1-phenylpent-4-en-2-ol 12c**

The general procedure was applied to 1-(2-methoxyphenyl)-2-phenylethanone (250 mg, 1.1 mmol). The crude product was purified by column chromatography on silica gel (hexanes: EtOAc = 5:95) to give the product (302 mg, 97% yield, 95:5 er). <sup>1</sup>H NMR (400 MHz, CDCl<sub>3</sub>): δ 7.24-7.17 (m, 2H), 7.16-7.10 (m, 3H), 6.99-6.94 (m, 2H), 6.88-6.79 (m, 2H), 4.76 (bs, 1H), 4.67 (bs, 1H), 3.88 (s, 3H), 3.45 (d, 1H, *J* = 13.3 Hz), 3.20 (d, 1H, *J* = 13.5 Hz), 3.09 (d, 1H, *J* = 13.3 Hz), 2.86 (s, 1H), 2.46 (d, 1H, *J* = 13.5 Hz), 1.38 (s, 3H); <sup>13</sup>C NMR (100 MHz, CDCl<sub>3</sub>): δ 142.9, 142.8, 134.8, 130.8, 129.3, 128.6, 126.6, 125.3, 125.1, 125.0, 123.6, 115.8, 74.7, 50.5, 30.2, 24.0. HRMS (ES pos.): *m/z* calcd for C<sub>19</sub>H<sub>21</sub>O<sup>+</sup> (M + H<sup>+</sup> - H<sub>2</sub>O): 265.1287, found: 265.1581. Optical Rotation: [α]<sub>D</sub><sup>22</sup> +27.1 (*c* = 0.90, CHCl<sub>3</sub>) for an enantiomerically enriched sample of 92.5:7.5 er.

Chiral HPLC conditions: Chiralcel OJ-RH, 4.6 x 150 mm, 5 μm; mobile phase A (acetonitrile), mobile phase B (0.1% HCO<sub>2</sub>H in water, adjusted with NH<sub>4</sub>OH to pH =

4.0), 48:52 A/B,  $\lambda = 220$  nm, flow rate: 1.3 mL min<sup>-1</sup>. The samples for HPLC were diluted with MeOH. (*R*)-**12c**,  $t_{\text{major}} = 10.58$  min; (*S*)-**12c**,  $t_{\text{minor}} = 11.28$  min.

#### **(*R*)-2-(4-Fluorophenyl)-4-methyl-1-phenylpent-4-en-2-ol 12d**

The general procedure was applied to 1-(4-fluorophenyl)-2-phenylethanone (107.1 mg, 0.5 mmol) in the presence of 5 mol % of **7** (8.06 mg, 0.03 mmol). The crude product was purified by column chromatography on silica gel (hexanes: EtOAc = 5:95) to give the product (136 mg, 97% yield, 96:4 er). <sup>1</sup>H NMR (400 MHz, CDCl<sub>3</sub>):  $\delta$  7.31-7.24 (m, 2H), 7.19-7.14 (m, 3H), 6.99-6.91 (m, 4H), 4.84 (bs, 1H), 4.67 (bs, 1H), 3.12 (d, 1H,  $J = 13.4$  Hz), 3.04 (d, 1H,  $J = 13.4$  Hz), 2.74 (d, 1H,  $J = 13.6$  Hz), 2.57 (d, 1H,  $J = 13.6$  Hz), 2.27 (s, 1H), 1.39 (s, 3H); <sup>13</sup>C NMR (100 MHz, CDCl<sub>3</sub>):  $\delta$  162.8, 160.0, 142.1, 141.5, 136.3, 130.7, 127.9, 127.4, 127.3, 126.6, 116.0, 114.6, 114.4, 75.3, 50.2, 50.1, 24.3. HRMS (ES pos.):  $m/z$  calcd for C<sub>18</sub>H<sub>23</sub>NFO (M + NH<sub>4</sub><sup>+</sup>): 288.1758, found: 288.1749. Optical Rotation:  $[\alpha]_{\text{D}}^{22} +22.3$  ( $c = 0.785$ , CHCl<sub>3</sub>) for an enantiomerically enriched sample of 96:4 er.

Chiral HPLC conditions: Chiralcel OJ-RH, 4.6 x 150 mm, 5  $\mu\text{m}$ ; mobile phase A (acetonitrile), mobile phase B (0.1% HCO<sub>2</sub>H in water, adjusted with NH<sub>4</sub>OH to pH = 4.0), 60:40 A/B,  $\lambda = 220$  nm, flow rate: 1.3 mL min<sup>-1</sup>. The samples for HPLC were diluted with MeOH. (*R*)-**12d**,  $t_{\text{major}} = 4.75$  min; (*S*)-**12d**,  $t_{\text{minor}} = 4.41$  min.

#### **(*R*)-2-(4-Chlorophenyl)-4-methyl-1-phenylpent-4-en-2-ol 12e**

The general procedure was applied to 1-(4-chlorophenyl)-2-phenylethanone (115.3 mg, 0.5 mmol) in the presence of 5 mol % of **7** (8.06 mg, 0.03 mmol). The crude product was purified by column chromatography on silica gel (hexanes: EtOAc = 5:95) to give the product **12e** (139 mg, 97% yield, 96:4 er). <sup>1</sup>H NMR (400 MHz, CDCl<sub>3</sub>):  $\delta$  7.28-7.21 (m, 4H), 7.19-7.14 (m, 3H), 6.97-6.91 (m, 2H), 4.83 (bs, 1H), 4.66 (bs, 1H), 3.12 (d, 1H,  $J = 13.4$  Hz), 3.03 (d, 1H,  $J = 13.4$  Hz), 2.73 (d, 1H,  $J = 13.6$  Hz), 2.56 (d, 1H,  $J = 13.6$  Hz), 2.26 (s, 1H), 1.39 (s, 3H); <sup>13</sup>C NMR (100 MHz, CDCl<sub>3</sub>):  $\delta$  144.5, 141.9, 136.2, 132.3, 130.7, 128.0, 127.3, 126.6, 116.1, 75.4, 50.1, 50.0, 24.4. HRMS (ES pos.):  $m/z$  calcd for C<sub>18</sub>H<sub>23</sub>NCIO (M + NH<sub>4</sub><sup>+</sup>): 304.1463, found: 304.1451. Optical Rotation:  $[\alpha]_{\text{D}}^{22} +29.5$  ( $c = 0.59$ , CHCl<sub>3</sub>) for an enantiomerically enriched sample of 96:4 er.



Chiral HPLC conditions: Chiralcel OJ-RH, 4.6 x 150 mm, 5  $\mu$ m; mobile phase A (acetonitrile), mobile phase B (0.1% HCO<sub>2</sub>H in water, adjusted with NH<sub>4</sub>OH to pH = 4.0), 60:40 A/B,  $\lambda$  = 220 nm, flow rate: 1.3 mL min<sup>-1</sup>. The samples for HPLC were diluted with MeOH. (*R*)-**12e**,  $t_{\text{major}}$  = 6.03 min; (*S*)-**12e**,  $t_{\text{minor}}$  = 5.75 min.

**(*R*)-2-(4-Bromophenyl)-4-methyl-1-phenylpent-4-en-2-ol 12f**

The general procedure was applied to 1-(4-bromophenyl)-2-phenylethanone (137.6 mg, 0.5 mmol) in the presence of 5 mol % of **7** (8.06 mg, 0.03 mmol). The crude product was purified by column chromatography on silica gel (hexanes: EtOAc = 5:95) to give the product (162 mg, 98% yield, 97:3 er). <sup>1</sup>H NMR (400 MHz, CDCl<sub>3</sub>):  $\delta$  7.42-7.37(m, 2H), 7.23-7.15 (m, 5H), 6.97-6.91 (m, 2H), 4.84 (bs, 1H), 4.67 (s, 1H), 3.12 (d, 1H,  $J$  = 13.4 Hz), 3.03 (d, 1H,  $J$  = 13.4 Hz), 2.73 (d, 1H,  $J$  = 13.7 Hz), 2.56 (d, 1H,  $J$  = 13.7 Hz), 2.26 (s, 1H), 1.40 (s, 3H); <sup>13</sup>C NMR (100 MHz, CDCl<sub>3</sub>):  $\delta$  145.0, 141.9, 136.1, 130.9, 130.7, 128.0, 127.6, 126.6, 120.4, 116.1, 75.4, 50.1, 50.0, 24.4. HRMS (ES pos.):  $m/z$  calcd for C<sub>18</sub>H<sub>23</sub>NBrO (M + NH<sub>4</sub><sup>+</sup>): 348.0958, found: 348.0940. Optical Rotation:  $[\alpha]_{\text{D}}^{22}$  +40 (c = 0.80, CHCl<sub>3</sub>) for an enantiomerically enriched sample of 97:3 er.

Chiral HPLC conditions: Chiralpak OD-H, 4.6 x 250 mm; 98:2 heptane/*iso*-propanol, 1.0 mL/min; 220 nm; (*R*)-**12f**,  $t$  = 16.47 min; (*S*)-**12f**,  $t$  = 19.54 min.

**(*R*)-2-(4-Methoxyphenyl)-4-methyl-1-(naphthalen-1-yl)pent-4-en-2-ol 12g**

The general procedure was applied to 1-(4-methoxyphenyl)-2-(naphthalen-1-yl)ethanone (138 mg, 0.5 mmol) in the presence of 5 mol % of **7** (8.06 mg, 0.03 mmol). The crude product was purified by column chromatography on silica gel (hexanes: EtOAc = 5:95) to give the product (159.6 mg, 96% yield, 93:7 er). <sup>1</sup>H NMR (400 MHz, CDCl<sub>3</sub>):  $\delta$  8.14-8.06 (m, 1H), 7.84-7.77 (m, 1H), 7.70 (d, 1H,  $J$  = 8.1 Hz), 7.48-7.38 (m, 2H), 7.34-7.27 (m, 3H), 7.11 (d, 1H,  $J$  = 7.0 Hz), 6.84-6.78 (m, 2H), 4.81 (s, 1H), 4.63 (s, 1H), 3.78 (s, 3H), 3.66 (d, 1H,  $J$  = 14.0 Hz), 3.46 (d, 1H,  $J$  = 14.0 Hz), 2.83 (d, 1H,  $J$  = 13.6 Hz), 2.60 (d, 1H,  $J$  = 13.6 Hz), 2.23 (s, 1H), 1.37 (s, 3H); <sup>13</sup>C NMR (100 MHz, CDCl<sub>3</sub>):  $\delta$  158.2, 142.5, 138.5, 133.8, 133.5, 133.2, 129.4, 128.5, 127.2, 126.8, 125.6, 125.3, 125.0, 115.8, 113.2, 76.0, 55.2, 49.8, 45.9, 24.4. HRMS (ES pos.):  $m/z$  calcd for C<sub>23</sub>H<sub>28</sub>NO<sub>2</sub> (M + NH<sub>4</sub><sup>+</sup>): 350.2115, found: 350.2093. Optical Rotation:  $[\alpha]_{\text{D}}^{22}$  +37.4 (c = 0.96, CHCl<sub>3</sub>) for an enantiomerically enriched sample of 93:7 er.

Chiral HPLC conditions: Chiralcel OJ-RH, 4.6 x 150 mm, 5  $\mu$ m; mobile phase A (acetonitrile), mobile phase B (0.1% HCO<sub>2</sub>H in water, adjusted with NH<sub>4</sub>OH to pH = 4.0), 52:48 A/B,  $\lambda$  = 220 nm, flow rate: 1.3 mL min<sup>-1</sup>. The samples for HPLC were diluted with MeOH. (*R*)-**12g**,  $t_{\text{major}}$  = 26.23 min; (*S*)-**12g**,  $t_{\text{minor}}$  = 27.77 min.

#### **(*R*)-2-(4-Methoxyphenyl)-4-methyl-1-(naphthalen-2-yl)pent-4-en-2-ol 12h**

The general procedure was applied to 1-(4-methoxyphenyl)-2-(naphthalen-2-yl)ethanone (138 mg, 0.5 mmol) in the presence of 5 mol % of **7** (16.73 mg, 0.05 mmol). The crude product was purified by column chromatography on silica gel (hexanes: EtOAc = 5:95) to give the product **12h** (164 mg, 99% yield, 98:2 er). <sup>1</sup>H NMR (400 MHz, CDCl<sub>3</sub>):  $\delta$  7.79-7.68 (m, 2H), 7.61 (d, 1H,  $J$  = 8.4 Hz), 7.49 (s, 1H), 7.45-7.37 (m, 2H), 7.28-7.22 (m, 2H), 7.06-7.01 (m, 1H), 6.84-6.78 (m, 2H), 4.83(s, 1H), 4.67 (s, 1H), 3.79 (s, 3H), 3.30 (d, 1H,  $J$  = 13.4 Hz), 3.19 (d, 1H,  $J$  = 13.4 Hz), 2.77 (d, 1H,  $J$  = 13.6 Hz), 2.59 (d, 1H,  $J$  = 13.6 Hz), 2.29 (s, 1H), 1.40(s, 3H); <sup>13</sup>C NMR (100 MHz, CDCl<sub>3</sub>):  $\delta$  158.2, 142.5, 137.9, 134.4, 133.2, 132.2, 129.4, 129.3, 127.7, 127.5, 127.1, 126.8, 125.7, 125.4, 115.7, 113.2, 75.5, 55.2, 50.2, 50.1, 24.4. HRMS (ES pos.):  $m/z$  calcd for C<sub>23</sub>H<sub>23</sub>O (M + H<sup>+</sup>-H<sub>2</sub>O): 315.1743, found: 315.1730. Optical Rotation:  $[\alpha]_{\text{D}}^{22}$  +80.4 ( $c$  = 0.83, CHCl<sub>3</sub>) for an enantiomerically enriched sample of 98:2 er.

Chiral HPLC conditions: Chiralcel OJ-RH, 4.6 x 150 mm, 5  $\mu$ m; mobile phase A (acetonitrile), mobile phase B (0.1% HCO<sub>2</sub>H in water, adjusted with NH<sub>4</sub>OH to pH = 4.0), 60:40 A/B,  $\lambda$  = 220 nm, flow rate: 1.3 mL min<sup>-1</sup>. The samples for HPLC were diluted with MeOH. (*R*)-**12h**,  $t_{\text{major}}$  = 10.31 min; (*S*)-**12h**,  $t_{\text{minor}}$  = 11.33 min.

#### **(*R*)-1-Chloro-3-(4-fluorophenyl)-5-methylhex-5-en-3-ol 12i**

The general procedure was applied to 3-chloro-1-(4-fluorophenyl)propan-1-one (96 mg, 0.5 mmol) in the presence of 5 mol % of **7** (8.06 mg, 0.03 mmol). The crude product was purified by column chromatography on silica gel (hexanes: EtOAc = 5:95) to give the product (115 mg, 95% yield, 85:15 er). <sup>1</sup>H NMR (400 MHz, CDCl<sub>3</sub>):  $\delta$  7.39-7.32 (m, 2H), 7.06-7.00 (m, 2H), 4.94 (bs, 1H), 4.77 (bs, 1H), 3.60-3.52 (m, 1H), 3.18-3.10 (m, 1H), 2.64 (d, 1H,  $J$  = 13.3 Hz), 2.54 (d, 1H,  $J$  = 13.3 Hz), 2.52 (s, 1H), 2.38-2.24 (m, 2H), 1.32 (s, 3H); <sup>13</sup>C NMR (100 MHz, CDCl<sub>3</sub>):  $\delta$  141.5, 140.4, 126.8, 116.8, 115.2, 115.0, 74.2, 51.5, 46.4, 40.0, 24.3. HRMS (ES pos.):  $m/z$  calcd for C<sub>13</sub>H<sub>15</sub>ClF<sup>+</sup> (M + H<sup>+</sup>-H<sub>2</sub>O):

225.0841, found: 225.0837. Optical Rotation:  $[\alpha]_D^{22}$  -56.3 ( $c = 0.70$ ,  $\text{CHCl}_3$ ) for an enantiomerically enriched sample of 85:15 er.

Chiral HPLC conditions: Chiralcel OJ-RH, 4.6 x 150 mm, 5  $\mu\text{m}$ ; mobile phase A (acetonitrile), mobile phase B (0.1%  $\text{HCO}_2\text{H}$  in water, adjusted with  $\text{NH}_4\text{OH}$  to pH = 4.0), 52:48 A/B,  $\lambda = 220$  nm, flow rate: 1.3  $\text{mL min}^{-1}$ . The samples for HPLC were diluted with MeOH. (*R*)-**12i**,  $t_{\text{major}} = 5.32$  min; (*S*)-**12i**,  $t_{\text{minor}} = 5.63$  min.

#### **(*R*)-4-Methyl-1-phenyl-2-(thiophen-3-yl)pent-4-en-2-ol 12j**

The general procedure was applied to 2-phenyl-1-(thiophen-3-yl)ethanone (0.21 g, 1.04 mmol) in the presence of 5 mol % of **7** (16.73 mg, 0.05 mmol). The crude product was purified by column chromatography on silica gel (hexanes: EtOAc = 5:95) to give the product (0.26 g, 98% yield, 96:4 er).  $^1\text{H}$  NMR (400 MHz,  $\text{CDCl}_3$ ),  $\delta$  7.27-7.25 (m, 1H), 7.20-7.16 (m, 3H), 6.97-6.93 (m, 4H), 4.86 (m, 1H), 4.70 (m, 1H), 3.02 (d,  $J = 13.32$  Hz, 1H), 3.03 (d,  $J = 13.36$  Hz, 1H), 2.67 (d,  $J = 13.44$  Hz, 1H), 2.55 (d,  $J = 13.44$  Hz, 1H), 2.33 (s, 1H), 1.44 (s, 3H).  $^{13}\text{C}$ -NMR (100 MHz,  $\text{CDCl}_3$ )  $\delta$  148.1, 142.3, 136.5, 130.6, 127.8, 126.5, 126.0, 125.4, 120.6, 115.7, 75.0, 50.2, 49.6, 24.1. HRMS (ES pos.):  $m/z$  calcd for  $\text{C}_{16}\text{H}_{22}\text{NOS}$  ( $\text{M} + \text{NH}_4^+$ ): 276.1417, found: 276.1416. Optical Rotation:  $[\alpha]_D^{22} +1.39$  ( $c = 0.79$ ,  $\text{CHCl}_3$ ) for an enantiomerically enriched sample of 96:4 er.

Chiral HPLC conditions: Chiralcel OJ-RH, 4.6 x 150 mm, 5  $\mu\text{m}$ ; mobile phase A (acetonitrile), mobile phase B (0.1%  $\text{HCO}_2\text{H}$  in water, adjusted with  $\text{NH}_4\text{OH}$  to pH = 4.0), 40:60 A/B,  $\lambda = 220$  nm, flow rate: 1.3  $\text{mL min}^{-1}$ . The samples for HPLC were diluted with MeOH. (*R*)-**12j**,  $t_{\text{major}} = 23.36$  min; (*S*)-**12j**,  $t_{\text{minor}} = 24.38$  min.

#### **(*R*)-4-Methyl-1-phenyl-2-(thiophen-2-yl)pent-4-en-2-ol 12k**

The general procedure was applied to 2-phenyl-1-(thiophen-2-yl)ethanone (0.21 g, 1.04 mmol) in the presence of 5 mol % of **7** (16.73 mg, 0.05 mmol). The crude product was purified by column chromatography on silica gel (hexanes: EtOAc = 5:95) to give the product (0.26 g, 97% yield, 97:3 er).  $^1\text{H}$  NMR (400 MHz,  $\text{CDCl}_3$ ),  $\delta$  7.26-7.18 (m, 3H), 7.15-7.13 (m, 1H), 7.06-7.03 (m, 2H), 6.92-6.90 (m, 1H), 6.76-6.74 (m, 1H), 4.91 (m, 1H), 4.73 (m, 1H), 3.18 (d,  $J = 13.4$  Hz, 1H), 3.10 (d,  $J = 13.4$  Hz, 1H), 2.70 (d,  $J = 13.5$  Hz, 1H), 2.61 (dd,  $J = 0.64, 13.5$  Hz, 1H), 2.58 (s, 1H), 1.50 (s, 3H).  $^{13}\text{C}$ -NMR (100 MHz,  $\text{CDCl}_3$ )  $\delta$  151.8, 142.1, 136.2, 130.7, 127.9, 126.7, 126.7, 123.7, 123.1, 116.1,

75.1, 51.1, 50.7, 24.2. HRMS (ES pos.):  $m/z$  calcd for  $C_{16}H_{22}NOS$  ( $M + NH_4^+$ ): 276.1417, found: 276.1419. Optical Rotation:  $[\alpha]_D^{22} +13.5$  ( $c = 0.89$ ,  $CHCl_3$ ) for an enantiomerically enriched sample of 96:4 er.

Chiral HPLC conditions: Chiralcel OJ-RH, 4.6 x 150 mm, 5  $\mu m$ ; mobile phase A (acetonitrile), mobile phase B (0.1%  $HCO_2H$  in water, adjusted with  $NH_4OH$  to pH = 4.0), 40:60 A/B,  $\lambda = 220$  nm, flow rate: 1.3 mL  $min^{-1}$ . The samples for HPLC were diluted with MeOH. (*R*)-**12k**,  $t_{major} = 24.43$  min; (*S*)-**12k**,  $t_{minor} = 26.30$  min.

### **(*S*)-5-Methyl-1,3-diphenylhex-5-en-3-ol 12l**

The general procedure was applied to 1,3-diphenylpropan-1-one (125 mg, 0.59 mmol) in the presence of 5 mol % of **7** (9.58 mg, 0.03 mmol). The crude product was purified by column chromatography on silica gel (hexanes: EtOAc = 5:95) to give the product (154 mg, 97% yield, 91:9 er).  $^1H$  NMR (400 MHz,  $CDCl_3$ )  $\delta$  7.46-7.43 (m, 2H), 7.37-7.33 (m, 2H), 7.26-7.21 (m, 3H), 7.15-7.08 (m, 3H), 4.90 (m, 1H), 4.77 (bs, 1H), 2.72-2.56 (m, 3H), 2.42 (s, 1H), 2.30-2.06 (m, 3H), 1.30 (s, 3H).  $^{13}C$ -NMR (100 MHz,  $CDCl_3$ )  $\delta$  145.9, 142.6, 142.4, 128.4, 128.3, 128.2, 126.5, 125.7, 125.4, 116.0, 75.0, 51.5, 45.5, 30.0, 24.3. HRMS (ES pos.):  $m/z$  calcd for  $C_{19}H_{21}^+$  ( $M + H^+ - H_2O$ ): 249.1638, found: 249.1639. Optical Rotation:  $[\alpha]_D^{22} -75.6$  ( $c = 0.88$ ,  $CHCl_3$ ) for an enantiomerically enriched sample of 91:9 er.

Chiral HPLC conditions: Chiralcel OJ-RH, 4.6 x 150 mm, 5  $\mu m$ ; mobile phase A (acetonitrile), mobile phase B (0.1%  $HCO_2H$  in water, adjusted with  $NH_4OH$  to pH = 4.0), 60:40 A/B,  $\lambda = 220$  nm, flow rate: 1.3 mL  $min^{-1}$ . The samples for HPLC were diluted with MeOH. (*R*)-**12l**,  $t_{minor} = 8.17$  min; (*S*)-**12l**,  $t_{major} = 7.36$  min.

### **(*S*)-2-Methyl-4,7-diphenylhept-1-en-4-ol 12m**

The general procedure was applied to 1,4-diphenylbutan-1-one (125 mg, 0.56 mmol) in the presence of 5 mol % of **7** (8.98 mg, 0.03 mmol). The crude product was purified by column chromatography on silica gel (hexanes: EtOAc = 5:95) to give the product (150 mg, 96% yield, 90:10 er).  $^1H$  NMR (400 MHz,  $CDCl_3$ ):  $\delta$  7.23-7.07 (m, 10 H), 4.86 (s, 1H), 4.72 (s, 1H), 2.63-2.49 (m, 4H), 2.33 (s, 1H), 1.91-1.80 (m, 3H), 1.38-1.29 (m, 1H), 1.27 (s, 3H);  $^{13}C$  NMR (100 MHz,  $CDCl_3$ ):  $\delta$  146.1, 142.5, 142.4, 128.4, 128.2, 128.0, 126.4, 125.7, 125.3, 115.9, 75.0, 51.3, 43.1, 36.1, 25.3, 24.3. HRMS (ES pos.):  $m/z$  calcd

for  $\text{C}_{20}\text{H}_{28}\text{NO}^+$  ( $\text{M} + \text{NH}_4^+$ ): 298.2165, found: 298.2156. Optical Rotation:  $[\alpha]_{\text{D}}^{22}$  -44.8 ( $c = 0.65$ ,  $\text{CHCl}_3$ ) for an enantiomerically enriched sample of 90:10 er.

Chiral HPLC conditions: Chiralcel OJ-RH, 4.6 x 150 mm, 5  $\mu\text{m}$ ; mobile phase A (acetonitrile), mobile phase B (0.1%  $\text{HCO}_2\text{H}$  in water, adjusted with  $\text{NH}_4\text{OH}$  to pH = 4.0), 60:40 A/B,  $\lambda = 220$  nm, flow rate: 1.3  $\text{mL min}^{-1}$ . The samples for HPLC were diluted with MeOH. (*R*)-**12m**,  $t_{\text{minor}} = 8.34$  min; (*S*)-**12m**,  $t_{\text{major}} = 6.83$  min.

### **(*R*)-1-(Benzyloxy)-4-methyl-2-phenylpent-4-en-2-ol 12n**

The general procedure was applied to 2-(benzyloxy)-1-phenylethanone (0.23 g, 1.02 mmol) in the presence of 5 mol % of **7** (6.55 mg, 0.02 mmol). The crude product was purified by column chromatography on silica gel (hexanes: EtOAc = 5:95) to give the product **12n** (269 mg, 93% yield, 85:15 er).  $^1\text{H}$  NMR (400 MHz,  $\text{CDCl}_3$ ),  $\delta$  7.44-7.42 (m, 2H), 7.34-7.22 (m, 8H), 4.78 (m, 1H), 4.63 (m, 1H), 4.54 (bs, 2H), 3.65 (d,  $J = 9.4$  Hz, 1H), 3.62 (d,  $J = 9.3$  Hz, 1H), 2.88 (s, 1H), 2.68 (d,  $J = 13.68$  Hz), 2.57 (d,  $J = 13.68$  Hz, 1H), 1.46 (s, 3H).  $^{13}\text{C}$ -NMR (100 MHz,  $\text{CDCl}_3$ )  $\delta$  144.2, 141.9, 138.0, 128.4, 128.0, 127.8, 127.7, 126.8, 125.5, 115.2, 77.3, 75.5, 73.4, 47.1, 24.3. HRMS (ES pos.):  $m/z$  calcd for  $\text{C}_{19}\text{H}_{26}\text{NO}_2$  ( $\text{M} + \text{NH}_4^+$ ): 300.1958, found: 300.1959. Optical Rotation:  $[\alpha]_{\text{D}}^{22}$  -24.3 ( $c = 1.02$ ,  $\text{CHCl}_3$ ) for an enantiomerically enriched sample of 84:16 er.

Chiral HPLC conditions: Chiralcel OJ-3, 4.6 x 150 mm, 5  $\mu\text{m}$ ; mobile phase A (heptane), mobile phase B (IPA), 92:8 A/B,  $\lambda = 220$  nm, flow rate: 1.0  $\text{mL min}^{-1}$ . The samples for HPLC were diluted with MeOH. (*R*)-**12n**,  $t_{\text{major}} = 6.63$  min; (*S*)-**12n**,  $t_{\text{minor}} = 9.53$  min.

### **(*S*)-4-Methyl-2-phenylpent-4-en-2-ol 12o<sup>5</sup>**

The general procedure was applied to acetophenone (60 mg, 0.50 mmol) in the presence of 5 mol % of **7** (0.025 mmol). The crude product was purified by column chromatography on silica gel (hexanes: EtOAc = 5:95) to give the product **12n** (85 mg, 96% yield, 78:22 er). Optical Rotation:  $[\alpha]_{\text{D}}^{22}$  -43.2 ( $c = 3.49$ ,  $\text{CHCl}_3$ ) for an enantiomerically enriched sample of 78:22 er.

Chiral HPLC conditions: Chiralcel OJ-RH, 4.6 x 150 mm, 5  $\mu\text{m}$ , mobile phase A (acetonitrile), mobile phase B (0.1%  $\text{HCO}_2\text{H}$  in water, adjusted with  $\text{NH}_4\text{OH}$  to pH =

4.0), 52:48 A/B,  $\lambda = 220$  nm, flow rate: 1.3 mL min<sup>-1</sup>. The samples for HPLC were diluted with MeOH. (*R*)-**12o**,  $t_{\text{minor}} = 3.75$  min; (*S*)-**12o**,  $t_{\text{major}} = 4.89$  min.

### (*R*)-tert-Butyl 3-hydroxy-5-methyl-3-phenylhex-5-enoate **12p**

The general procedure was applied to tert-butyl 3-oxo-3-phenylpropanoate (0.23 g, 0.98 mmol) in the presence of 5 mol % of **1** (15.82 mg, 0.05 mmol). The crude product was purified by column chromatography on silica gel (hexanes: EtOAc = 5:95) to give the product **12p** (275 mg, 95% yield, 78:22 er). <sup>1</sup>H NMR (400 MHz, CDCl<sub>3</sub>),  $\delta$  7.44-7.42 (m, 2H), 7.32-7.29 (m, 2H), 7.26-7.21 (m, 1H), 4.82 (m, 1H), 4.63 (m, 1H), 4.42 (bs, 1H), 2.89 (d,  $J = 11.61$  Hz, 1H), 2.77 (d,  $J = 15.52$  Hz, 1H), 2.50 (d,  $J = 13.56$  Hz, 1H), 2.45 (d,  $J = 13.52$  Hz, 1H), 1.62 (s, 3H), 1.23 (s, 9H). <sup>13</sup>C-NMR (100 MHz, CDCl<sub>3</sub>)  $\delta$  172.3, 146.0, 142.0, 127.9, 126.7, 125.3, 115.3, 81.7, 75.3, 51.4, 45.8, 27.8, 24.3. HRMS (ES pos.):  $m/z$  calcd for C<sub>34</sub>H<sub>48</sub>NaO<sub>6</sub> (2M + Na<sup>+</sup>): 575.3343, found: 575.3352. Optical Rotation:  $[\alpha]_{\text{D}}^{22} +11.8$  ( $c = 0.89$ , CHCl<sub>3</sub>) for an enantiomerically enriched sample of 80:20 er.

Chiral HPLC conditions: Chiralcel OJ-RH, 4.6 x 150 mm, 5  $\mu\text{m}$ ; mobile phase A (acetonitrile), mobile phase B (0.1% HCO<sub>2</sub>H in water, adjusted with NH<sub>4</sub>OH to pH = 4.0), 48:52 A/B,  $\lambda = 220$  nm, flow rate: 1.3 mL min<sup>-1</sup>. The samples for HPLC were diluted with MeOH. (*R*)-**12p**,  $t_{\text{major}} = 7.31$  min; (*S*)-**12p**,  $t_{\text{minor}} = 9.10$  min.

### Synthesis of enantioenriched (*R*)-tert-butyl 4-(6-(2-methylallyl)-2-oxo-6-phenyl-1,3-oxazinan-3-yl)piperidine-1-carboxylate **1**

#### *Synthesis of tert-butyl 4-isocyanatopiperidine-1-carboxylate 13*

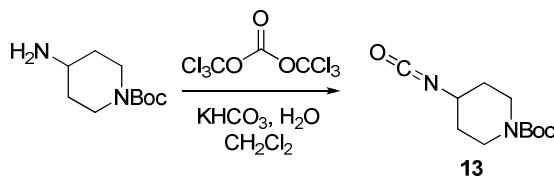

To a flask was charged KHCO<sub>3</sub> (5.75 g; 57.42 mmol) and H<sub>2</sub>O (50.00 ml; 10.000 V) followed by addition of CH<sub>2</sub>Cl<sub>2</sub> (50.00 ml; 10.000 V) and 4-amino-1-Boc-piperidine (5.00 g; 24.97 mmol). The resulting mixture was cooled to 0 °C. Triphosgene (2.56 g; 8.44 mmol) was charged in one portion. After the mixture was stirred for 1h, the organic layer was separated. The aqueous layer was extracted with CH<sub>2</sub>Cl<sub>2</sub> (2 x 30 mL). The combined organic layers were washed successively with water and brine, and dried with

anhydrous Na<sub>2</sub>SO<sub>4</sub>. After removal of the solvent, the residue was dissolved in hexanes. After the mixture was stirred for 1h, the solid (small amount of urea) was filtered off. The filtrate was concentrated to give the tert-butyl 4-isocyanatopiperidine-1-carboxylate **13** as a liquid, which was used for next step directly.

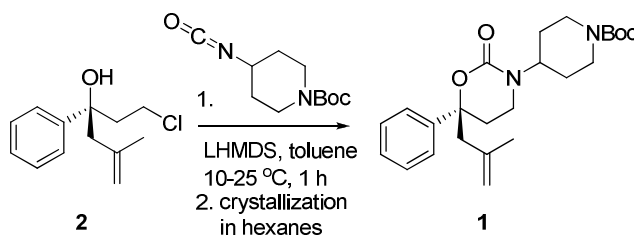

*Synthesis of (R)-tert-butyl 4-(6-(2-methylallyl)-2-oxo-6-phenyl-1,3-oxazinan-3-yl)piperidine-1-carboxylate 1*

To a dry flask was charged (*R*)-1-chloro-5-methyl-3-phenylhex-5-en-3-ol **2** (3.20 g, 13.67 mmol) with 87:13 er, tert-butyl 4-isocyanatopiperidine-1-carboxylate **13** (13.67 mmol) and anhydrous toluene (35 mL). After the mixture was cooled to ~10 °C, LiHMDS (1M in toluene, 14.36 mL) was added while maintaining the internal temperature below 25 °C. After 1h, the mixture was extracted with EtOAc (2 X 100 mL), washed successively with aq. NH<sub>4</sub>Cl and water, and dried with anhydrous Na<sub>2</sub>SO<sub>4</sub>. After removal of the solvent, the residue was stirred in 15 mL of hexanes at rt. After overnight, the white solid was collected and washed with 10 mL of 5:1 hexanes/EtOAc to give the product **1** with 99.4:0.6 er (3.5 g, 62% yield).

<sup>1</sup>H NMR (400 MHz, CDCl<sub>3</sub>): δ 7.37-7.27 (m, 5H), 4.87 (s, 1H), 4.68 (s, 1H), 4.27-4.07 (m, 3H), 3.08-3.04 (m, 1H), 2.75-2.53 (m, 5H), 2.38-2.35 (m, 1H), 2.6-2.21 (m, 1H), 1.66 (bs, 4H), 1.42 (s, 9H), 1.30-1.24 (m, 1H); <sup>13</sup>C NMR (100 MHz, CDCl<sub>3</sub>): δ 154.5, 152.9, 141.9, 140.5, 128.6, 127.6, 124.8, 116.3, 83.1, 79.6, 53.7, 50.8, 43.1, 36.6, 30.4, 28.4, 28.3, 24.3. HRMS (ES pos.): m/z calcd for C<sub>24</sub>H<sub>35</sub>N<sub>2</sub>O<sub>4</sub><sup>+</sup> (M + H<sup>+</sup> - H<sub>2</sub>O): 415.2591, found: 415.2598.

Chiral HPLC conditions: Chiralpak AD-H, 4.6 x 250 mm; 85:15 pentane/*iso*-propanol, 1.0 mL/min; 220 nm; (*S*)-**1**, *t*<sub>minor</sub> = 5.47 min; (*R*)-**1**, *t*<sub>major</sub> = 6.01 min.

**(R)-4-Methylene-1,2-diphenylhexan-2-ol 16**

The general procedure was applied to 1,2-diphenylethanone (0.20, 1.02 mmol) in the presence of 5 mol % of **7** (16.42 mg, 0.05 mmol) and boronate **14** (1.53 mmol, 1.5 equiv).

The crude product was purified by column chromatography on silica gel (hexanes: EtOAc = 5:95) to give the product (251 mg, 93% yield, 95:5 er). <sup>1</sup>H NMR (400 MHz, CDCl<sub>3</sub>), δ 7.34-7.24 (m, 4H), 7.21-7.14 (m, 4H), 6.97-6.95 (m, 2H), 4.84 (m, 1H), 4.70 (s, 1H), 3.17 (d, *J* = 13.4 Hz, 1H), 3.06 (d, *J* = 13.7 Hz, 1H), 2.79 (d, *J* = 13.7 Hz, 1H), 2.53 (d, *J* = 13.7 Hz, 1H), 2.30 (s, 1H), 1.60 (q, *J* = 7.2 Hz, 2H), 0.83 (t, *J* = 7.4 Hz, 3H). <sup>13</sup>C-NMR (100 MHz, CDCl<sub>3</sub>) δ 147.8, 146.0, 136.7, 130.8, 127.8, 126.4, 126.4, 125.6, 113.3, 75.5, 49.9, 48.5, 29.9, 12.3. HRMS (ES pos.): *m/z* calcd for C<sub>19</sub>H<sub>26</sub>NO (M + NH<sub>4</sub><sup>+</sup>): 284.2009, found: 284.2003. Optical Rotation: [α]<sub>D</sub><sup>22</sup> +15.6 (c = 0.90, CHCl<sub>3</sub>) for an enantiomerically enriched sample of 95:5 er.

Chiral HPLC conditions: Chiralpak OD-H, 4.6 x 250 mm; 98:2 heptane/*iso*-propanol, 1.0 mL/min; 220 nm; (*R*)-**16**, *t*<sub>major</sub> = 7.71 min; (*S*)-**16**, *t*<sub>minor</sub> = 11.45 min.

#### (*R*)-4-Methylene-1,2-diphenyloctan-2-ol **17**

The general procedure was applied to 1,2-diphenylethanone in the presence of 5 mol % of **7** (16.73 mg, 0.05 mmol) and boronate **15** (1.53 mmol, 1.5 equiv). The crude product was purified by column chromatography on silica gel (hexanes: EtOAc = 5:95) to give the product **17** (294 mg, 95% yield, 93:7 er). <sup>1</sup>H NMR (400 MHz, CDCl<sub>3</sub>), δ 7.34-7.25 (m, 4H), 7.21-7.14 (m, 4H), 6.98-6.96 (m, 2H), 4.82 (s, 1H), 4.70 (s, 1H), 3.17 (d, *J* = 13.4 Hz, 1H), 3.06 (d, *J* = 13.3 Hz, 1H), 2.79 (d, *J* = 13.6 Hz, 1H), 2.53 (d, *J* = 13.7 Hz, 1H), 2.32 (s, 1H), 1.51-1.59 (m, 1H), 1.53-1.46 (m, 1H), 1.23-1.07 (m, 4H), 0.77 (t, *J* = 7.2 Hz, 3H). <sup>13</sup>C-NMR (100 MHz, CDCl<sub>3</sub>) δ 146.4, 146.0, 136.7, 130.8, 127.8, 126.4, 126.4, 125.6, 114.5, 75.5, 49.9, 48.1, 36.7, 29.9, 22.3, 13.9. HRMS (ES pos.): *m/z* calcd for C<sub>21</sub>H<sub>30</sub>NO (M + NH<sub>4</sub><sup>+</sup>): 312.2322, found: 312.2314. Optical Rotation: [α]<sub>D</sub><sup>22</sup> +17.1 (c = 0.55, CHCl<sub>3</sub>) for an enantiomerically enriched sample of 93:7 er.

Chiral HPLC conditions: Chiralcel OJ-RH, 4.6 x 150 mm, 5 μm; mobile phase A (acetonitrile), mobile phase B (0.1% HCO<sub>2</sub>H in water, adjusted with NH<sub>4</sub>OH to pH = 4.0), 60:40 A/B, λ = 220 nm, flow rate: 1.3 mL min<sup>-1</sup>. The samples for HPLC were diluted with MeOH. (*R*)-**17**, *t*<sub>major</sub> = 7.09 min; (*S*)-**17**, *t*<sub>major</sub> = 8.24 min.

#### References:

1. X. Wu, T-A. Chen, L. Zhu, R. D. Rieke, *Tetrahedron Lett.* **1994**, *35*, 3673.
2. J. A. Turner, W. S. Jacks, *J. Org. Chem.* **1989**, *54*, 4229.



3. No racemization was observed in 1:1 THF:3M HCl after 16 h at 60 °C. However, the er changed from >99:1 to 90.5:9.5 in 2M NaOH after 16 h at 100 °C.
4. T. R. Hoye, A. W. Aspaas, B. M. Eklov, T. D. Ryba. *Org. Lett.* **2005**, 7, 2205.
5. J. G. Kim, E. H. Camp, P. J. Walsh, *Org. Lett.* **2006**, 8, 4413-4416.

**(S)-3,3'-Difluoro-1,1'-binaphthyl-2,2'-diol 7**

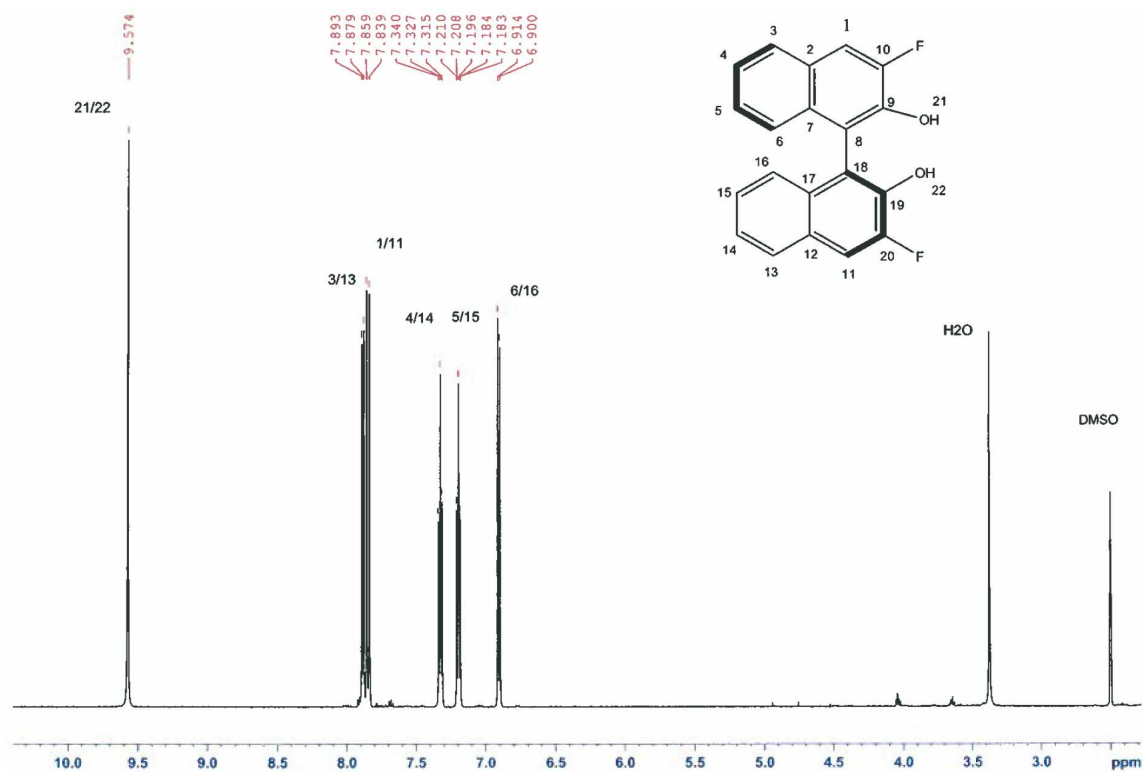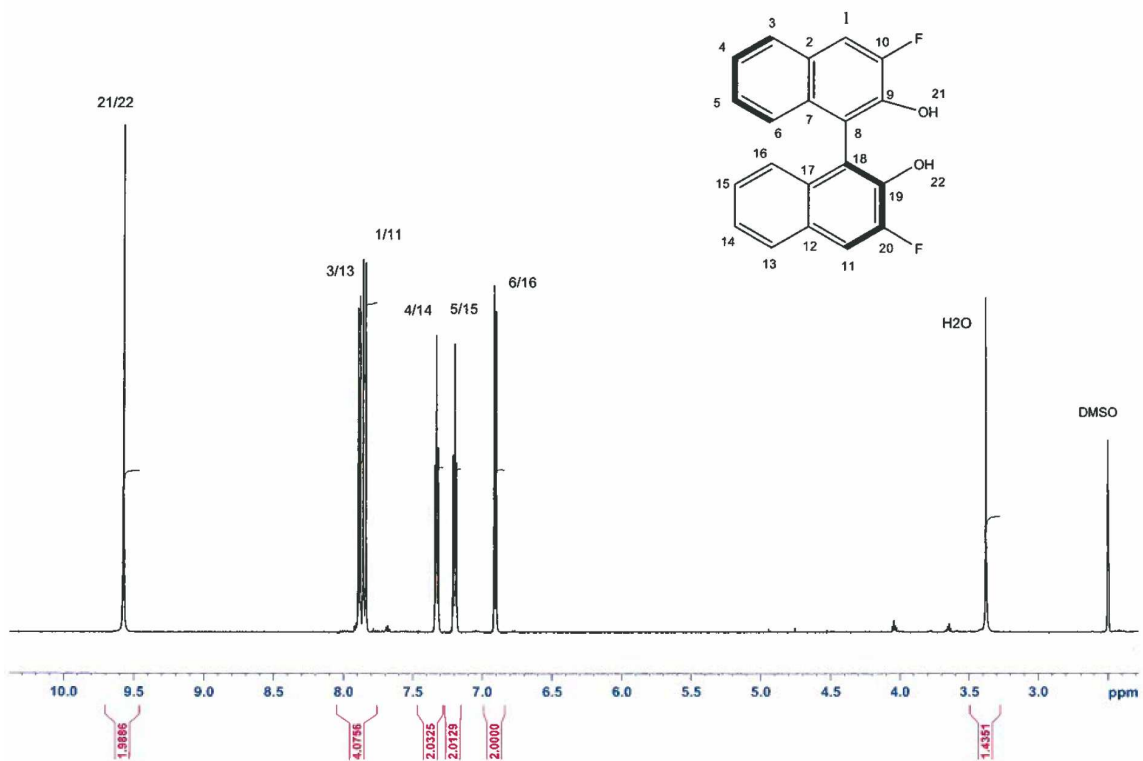

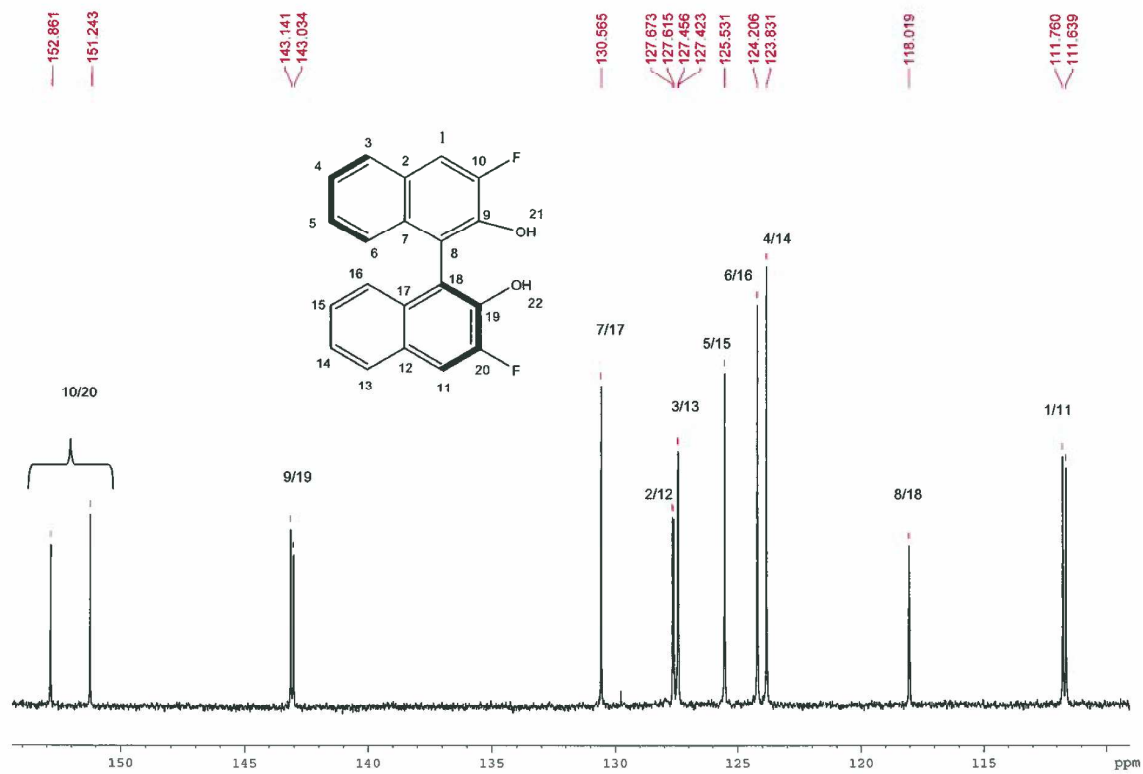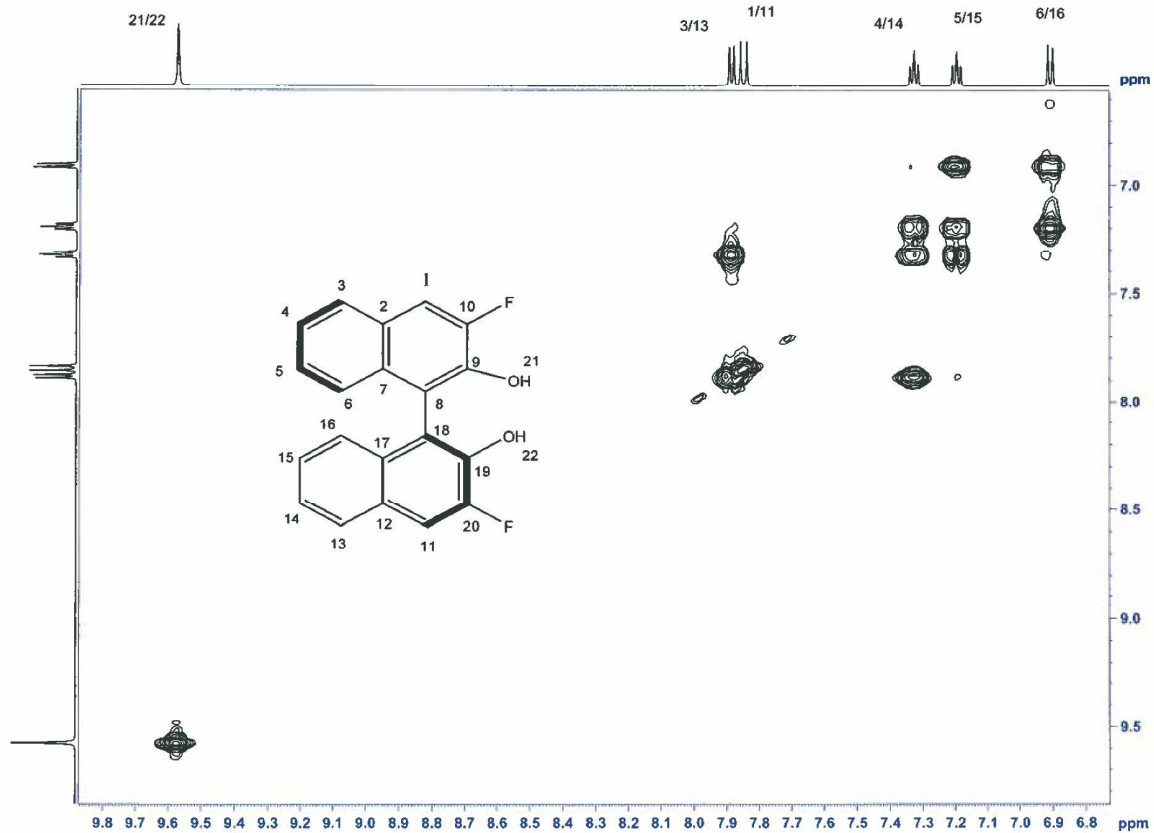

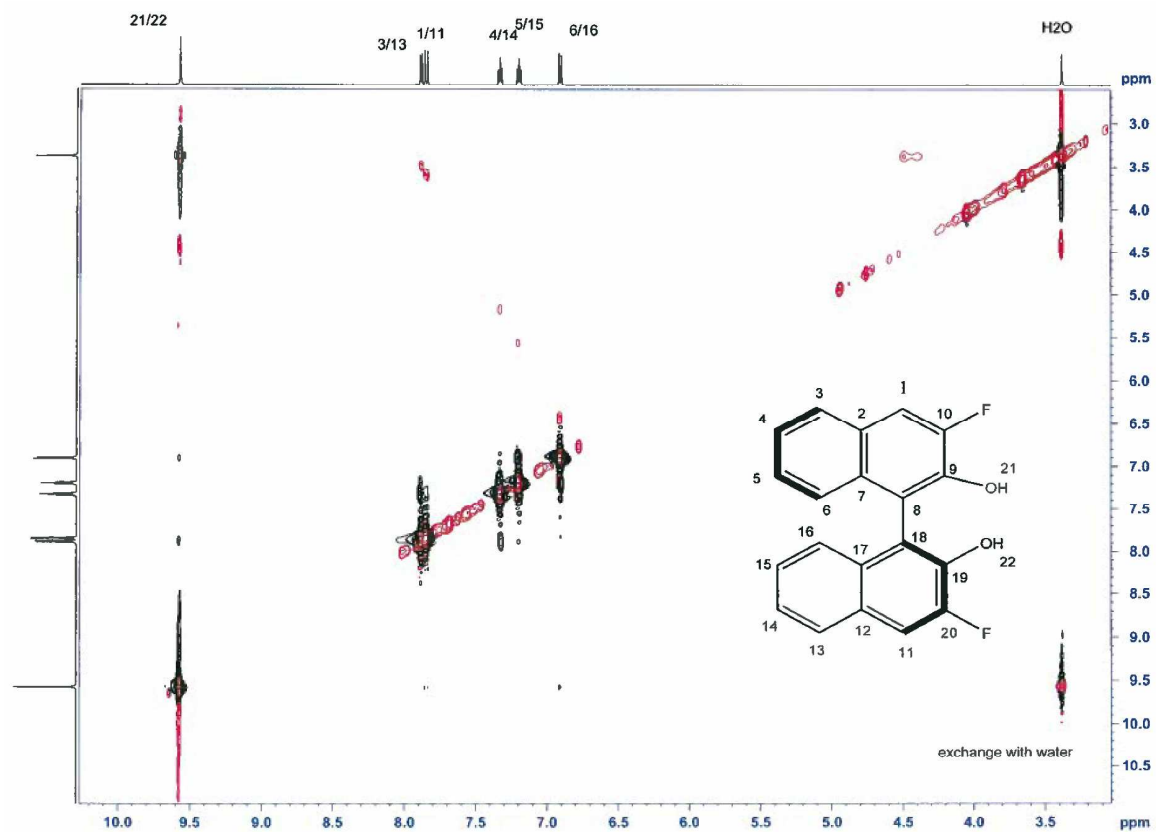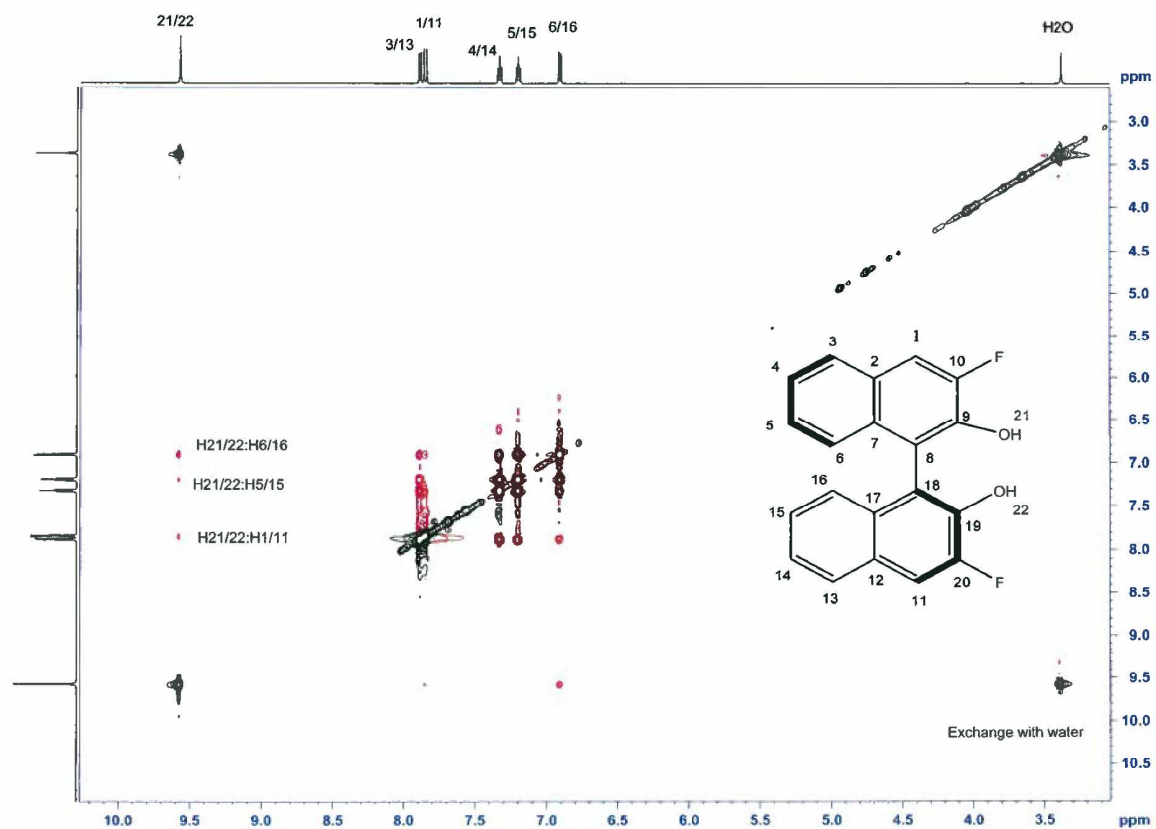

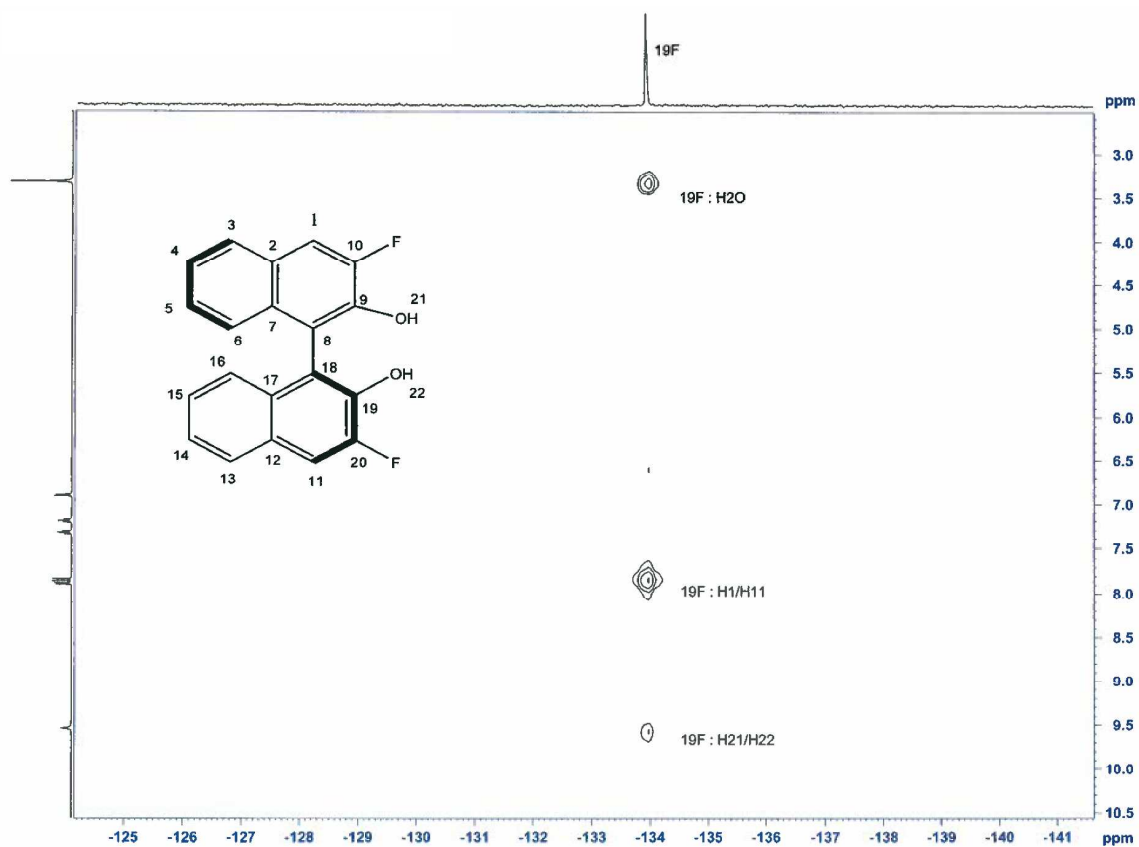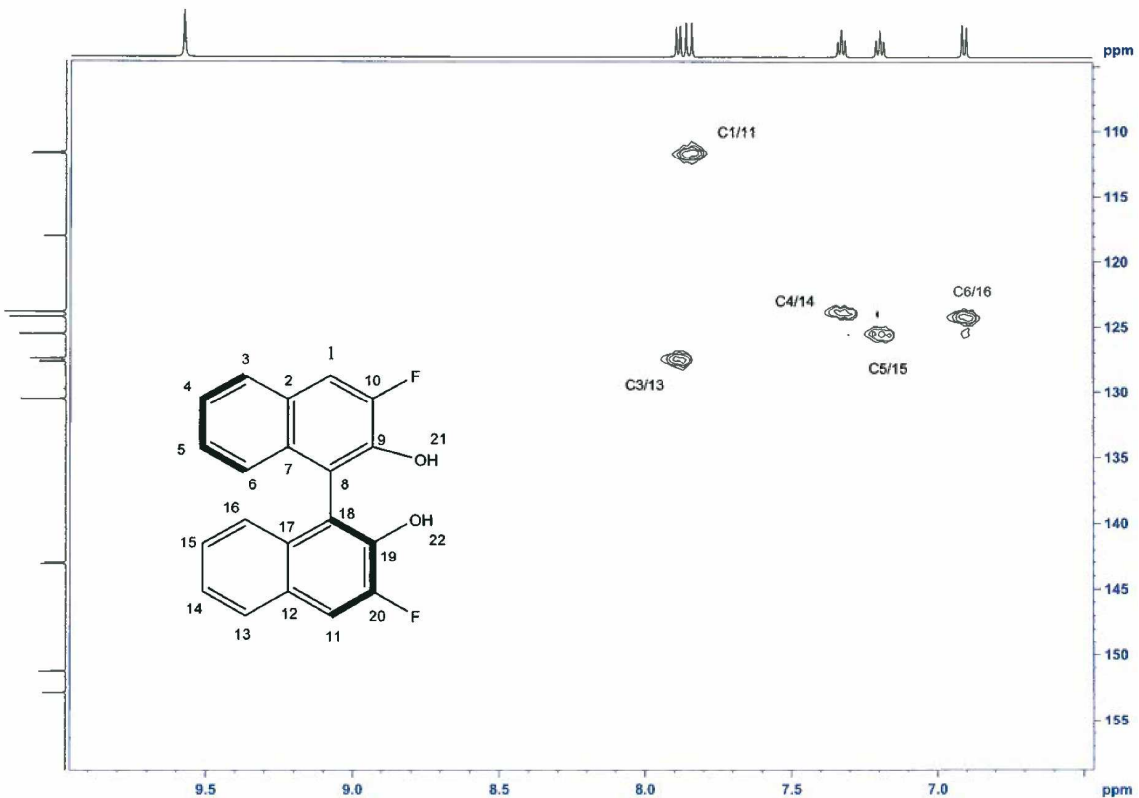

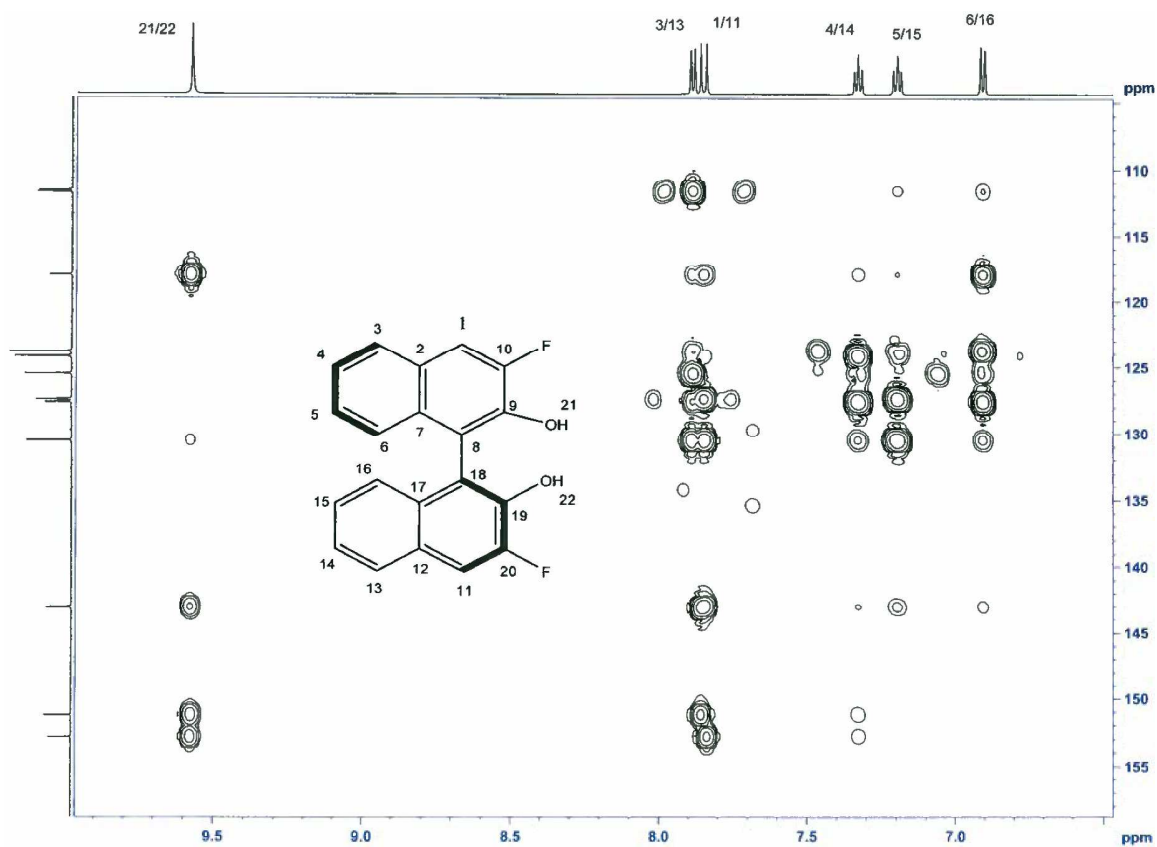

# 5,5-Dimethyl-2-(2-methylallyl)-1,3,2-dioxaborinane 4

102711-054-H

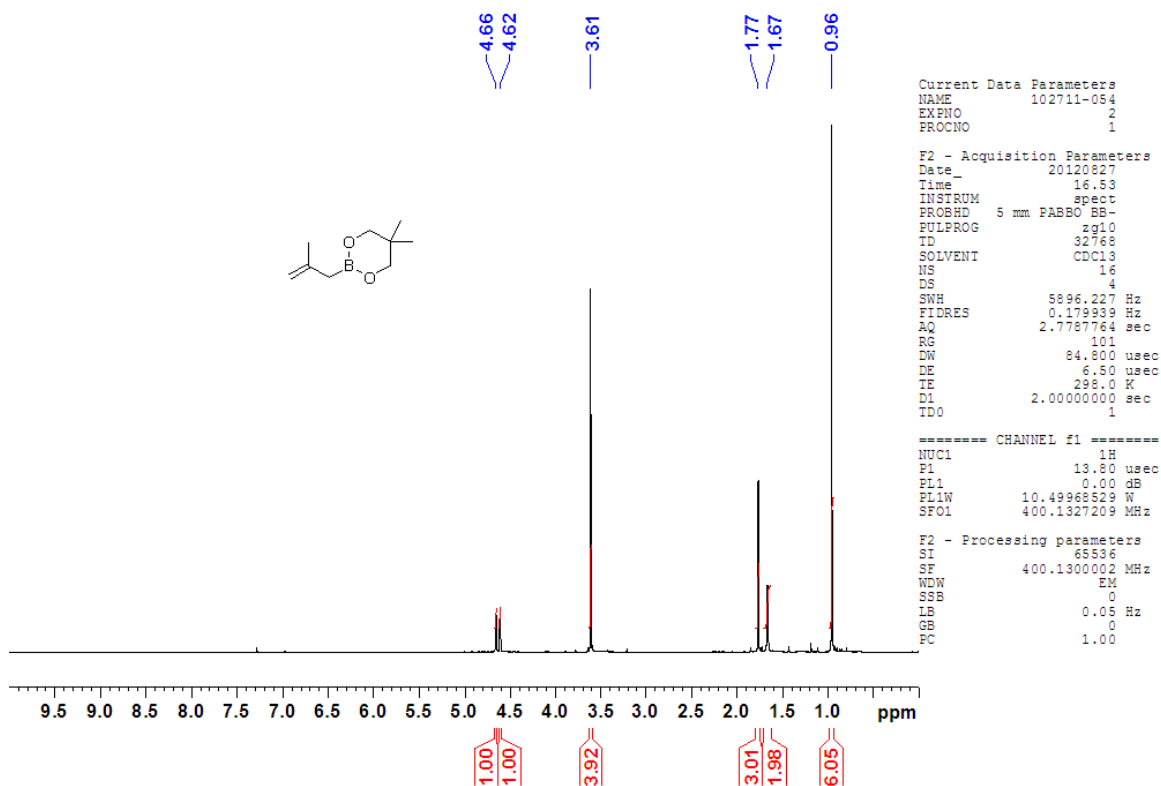

102711-054-C

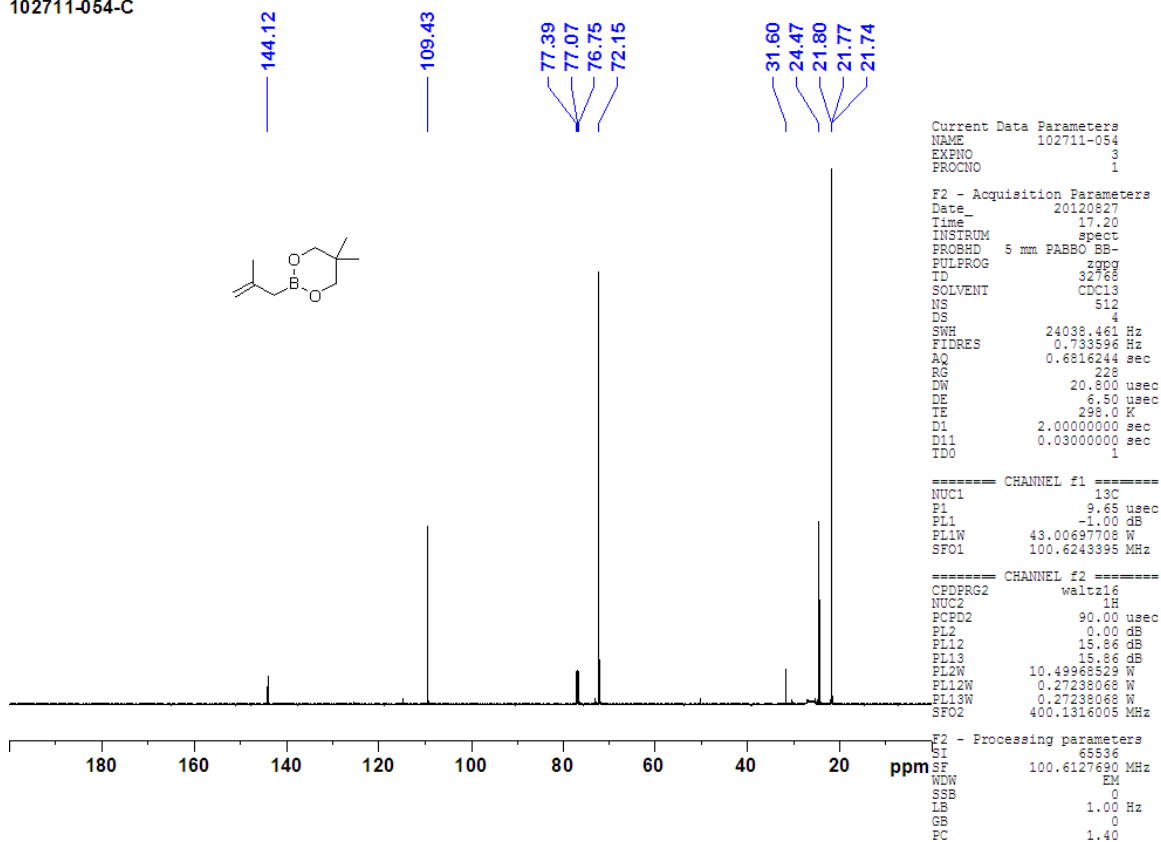

**(R)-1-Chloro-5-methyl-3-phenylhex-5-en-3-ol 2**

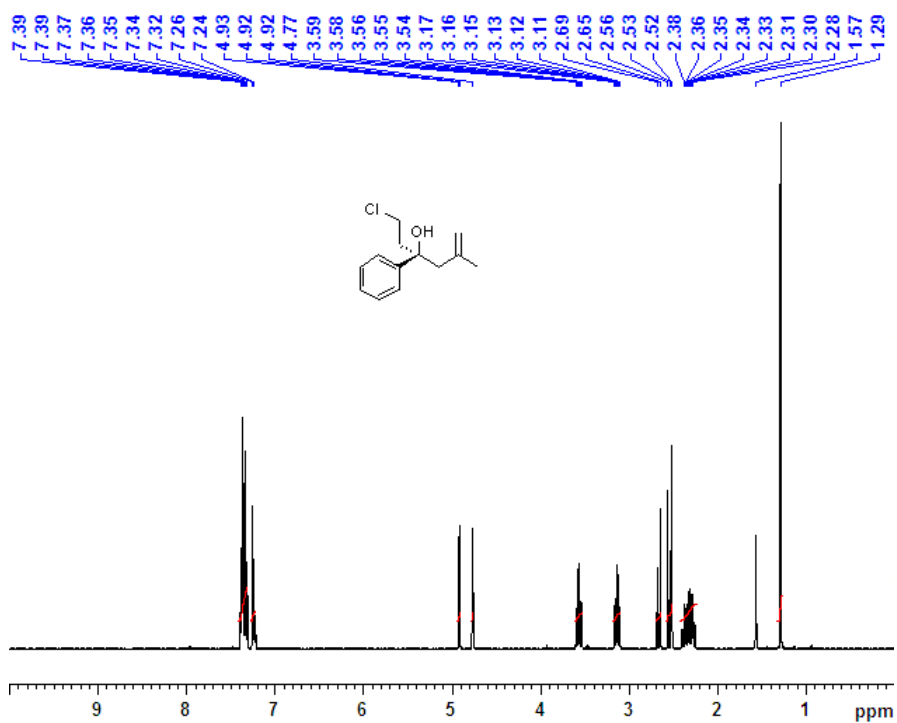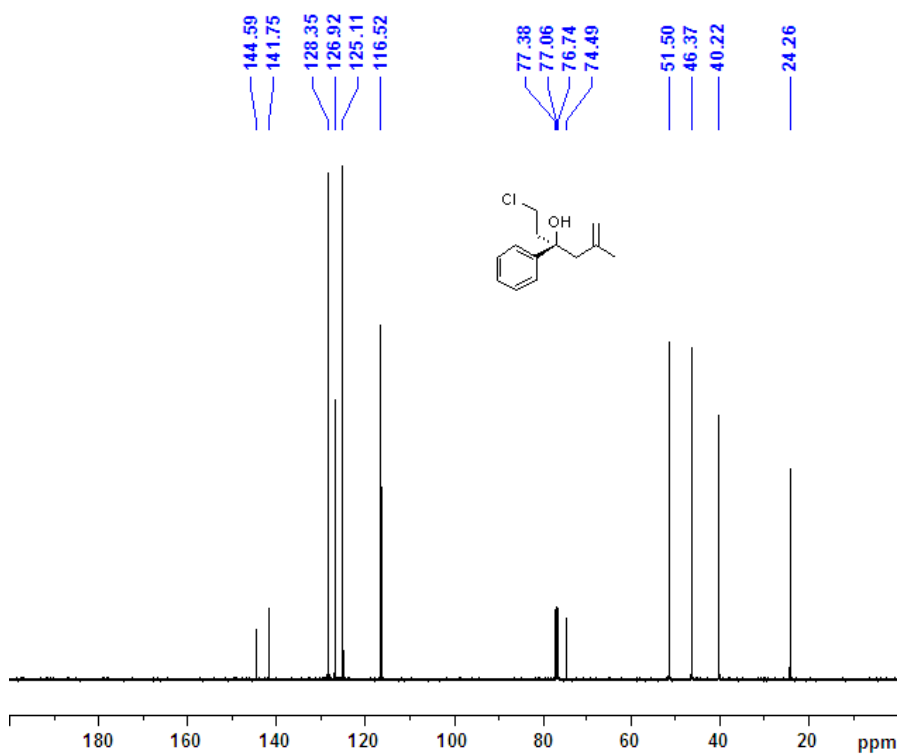



**(R)-4-Methyl-1,2-diphenylpent-4-en-2-ol 12a**

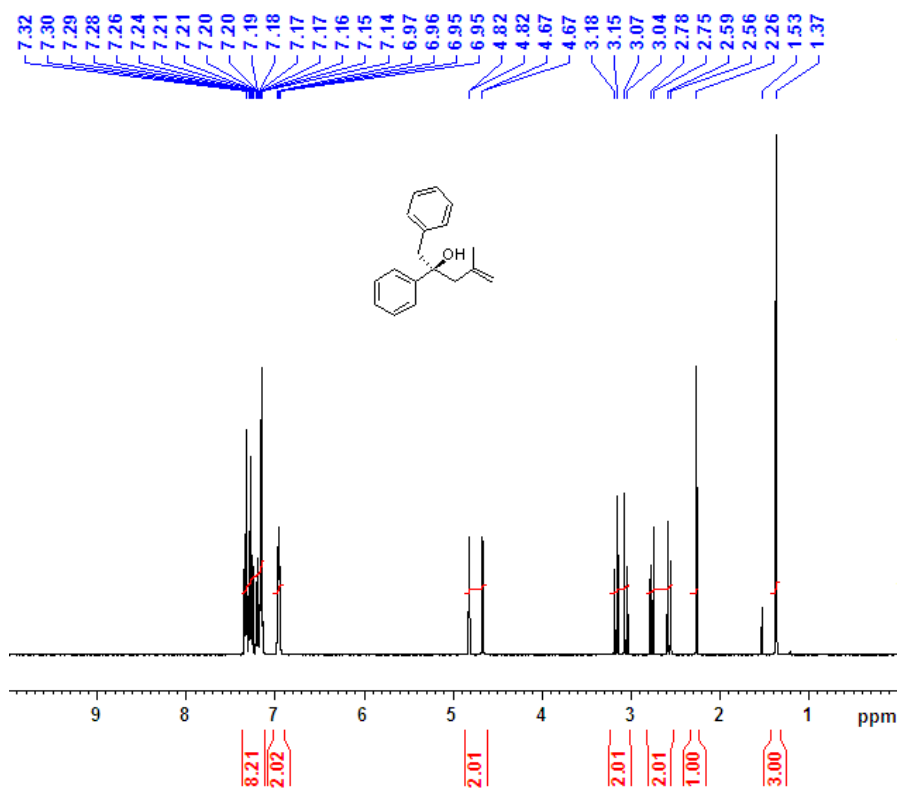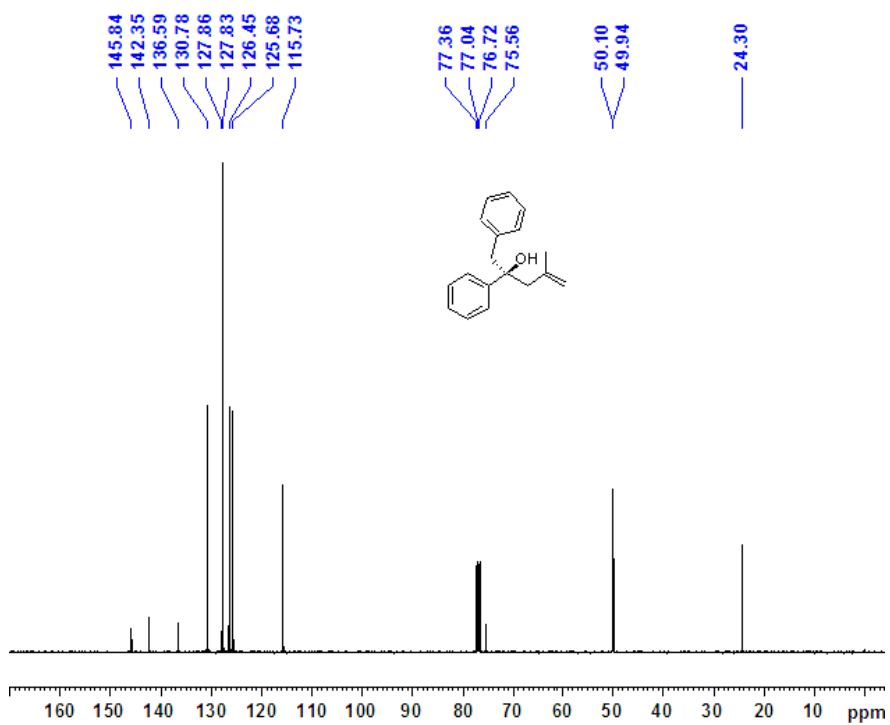

**(R)-1-(3-Methoxyphenyl)-4-methyl-2-phenylpent-4-en-2-ol 12b**

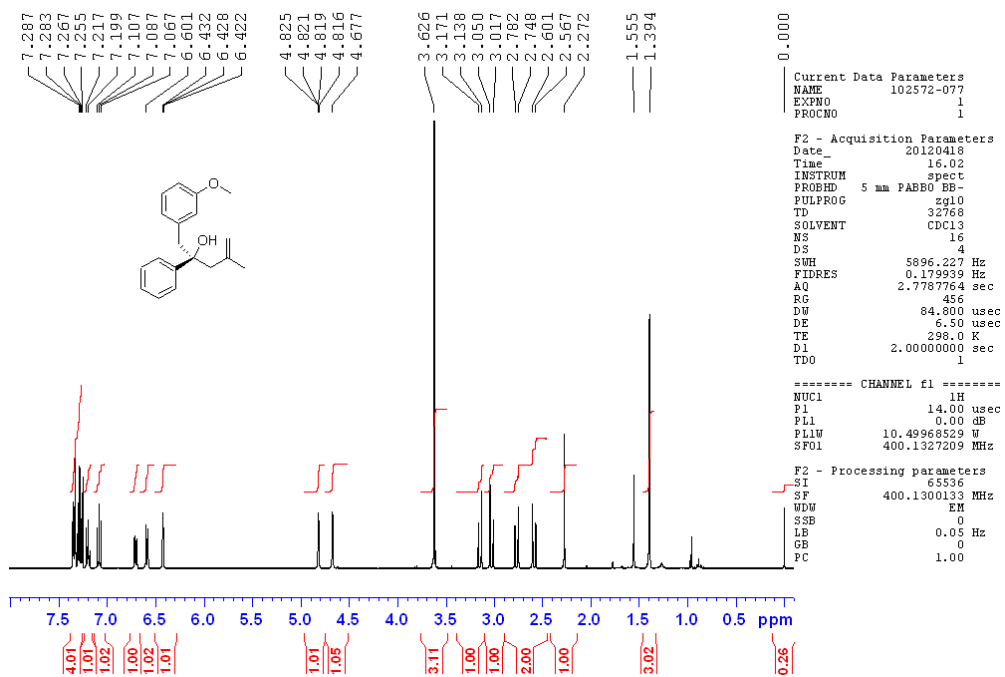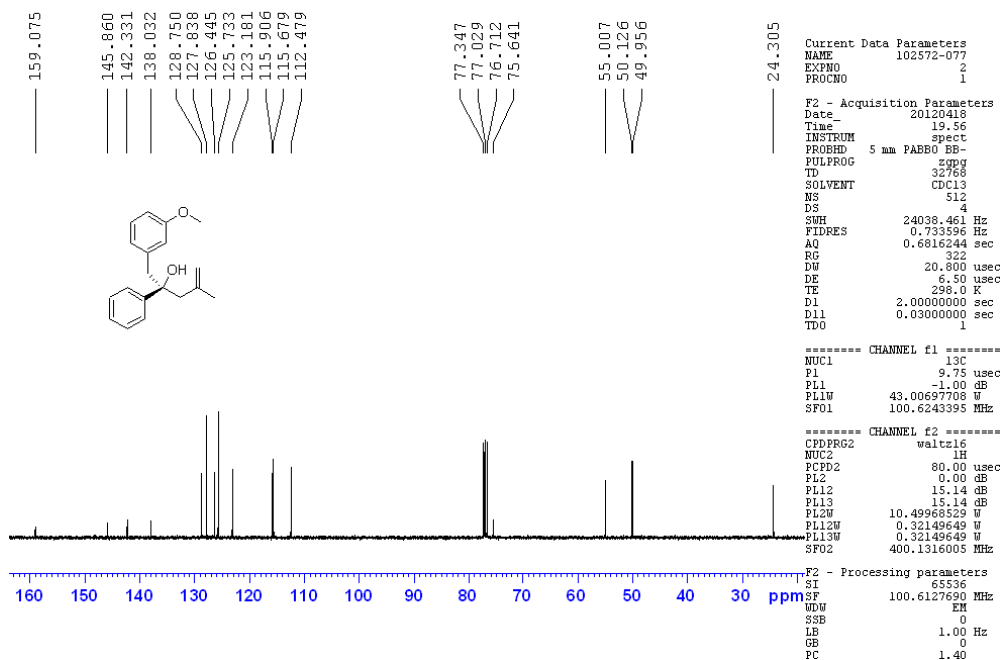

**(R)-2-(2-Methoxyphenyl)-4-methyl-1-phenylpent-4-en-2-ol 12c**

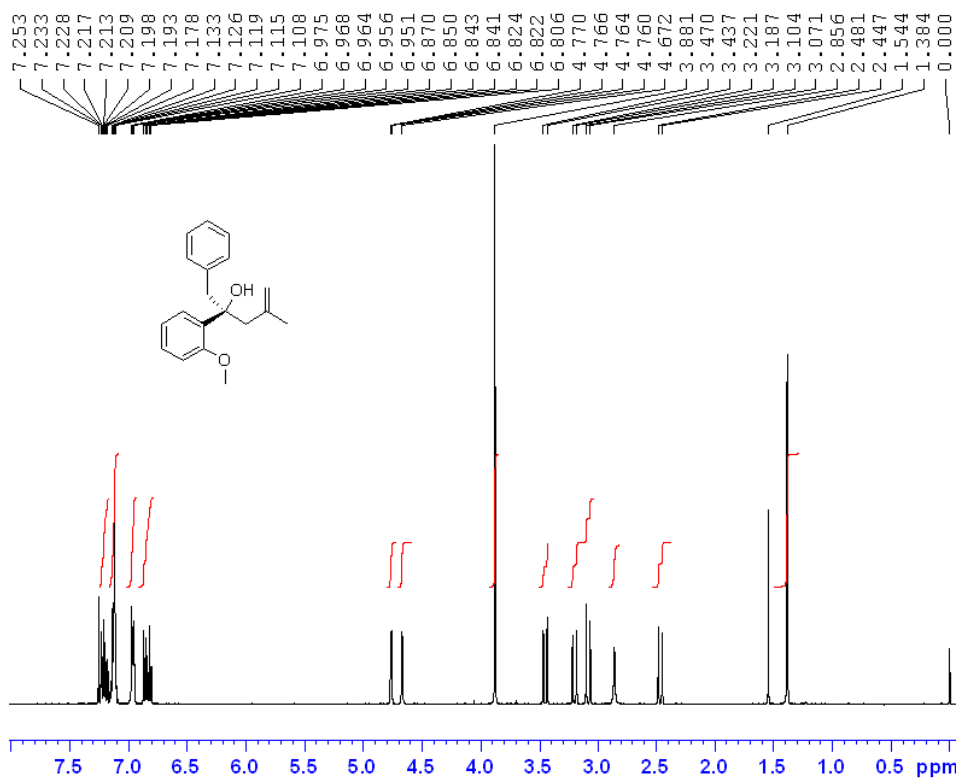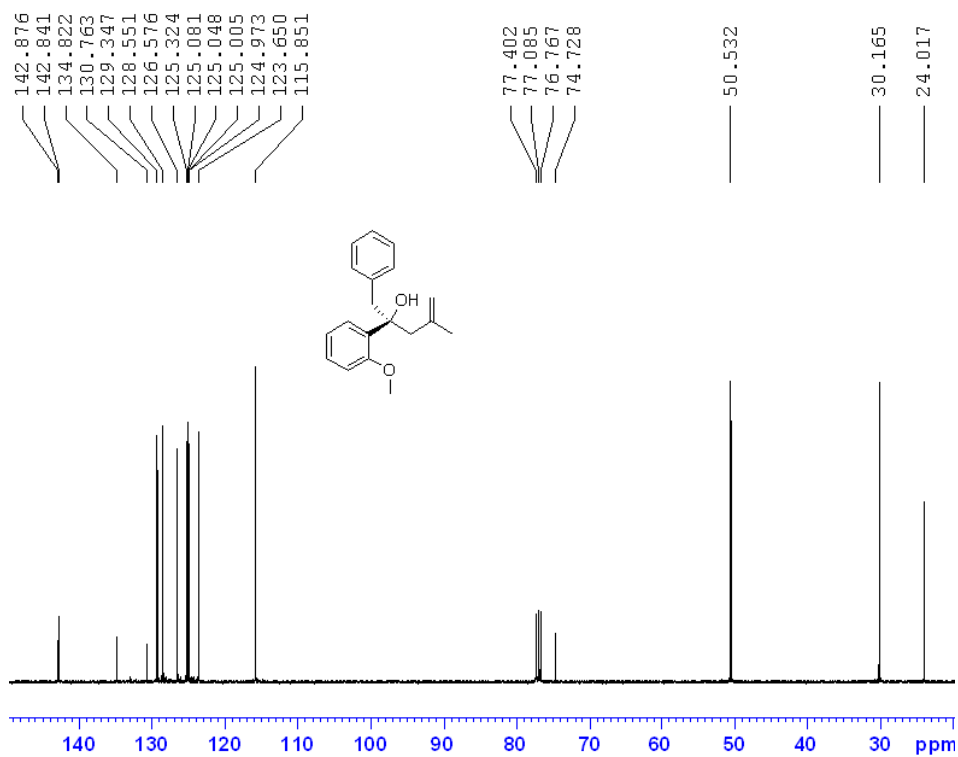

**(R)-2-(4-Fluorophenyl)-4-methyl-1-phenylpent-4-en-2-ol 12d**

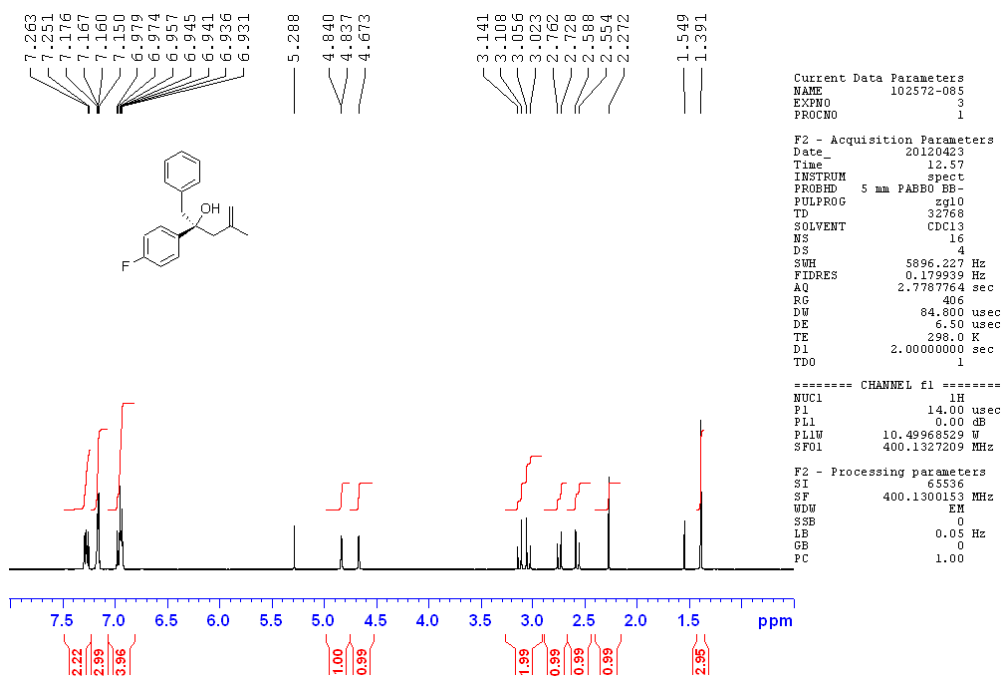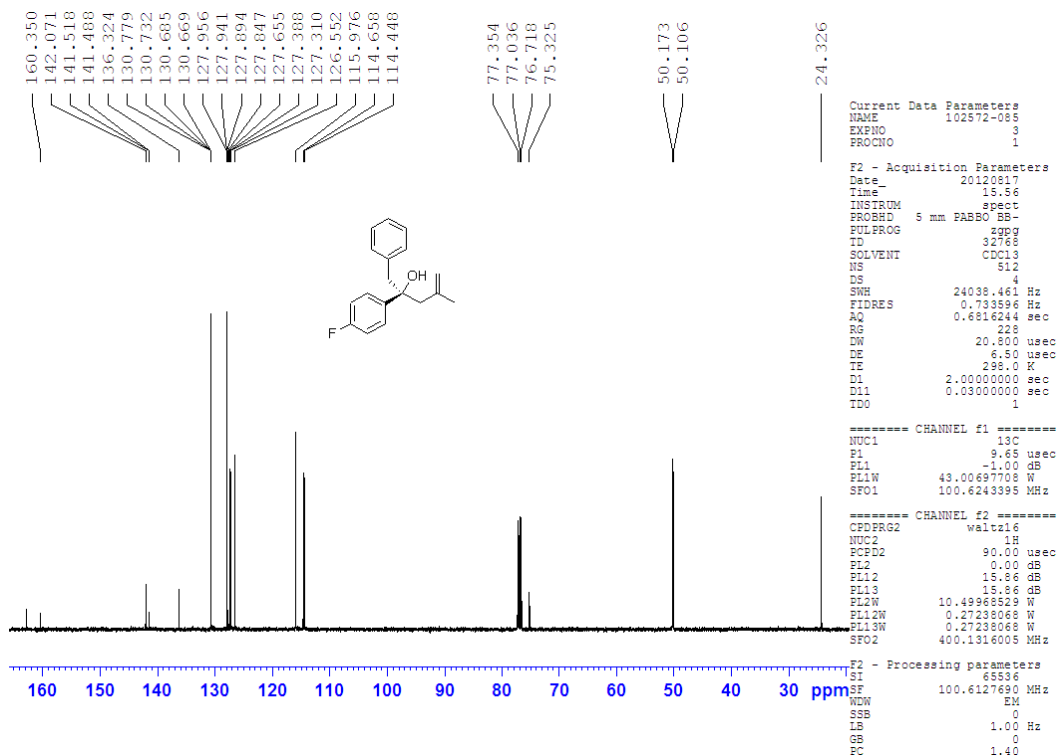

**(R)-2-(4-Chlorophenyl)-4-methyl-1-phenylpent-4-en-2-ol 12e**

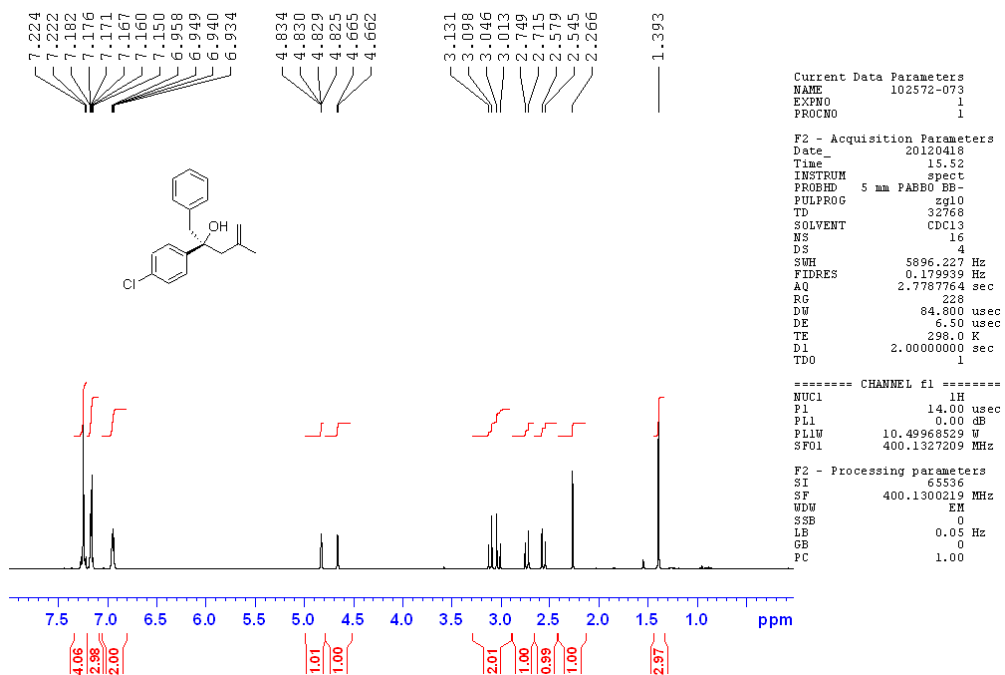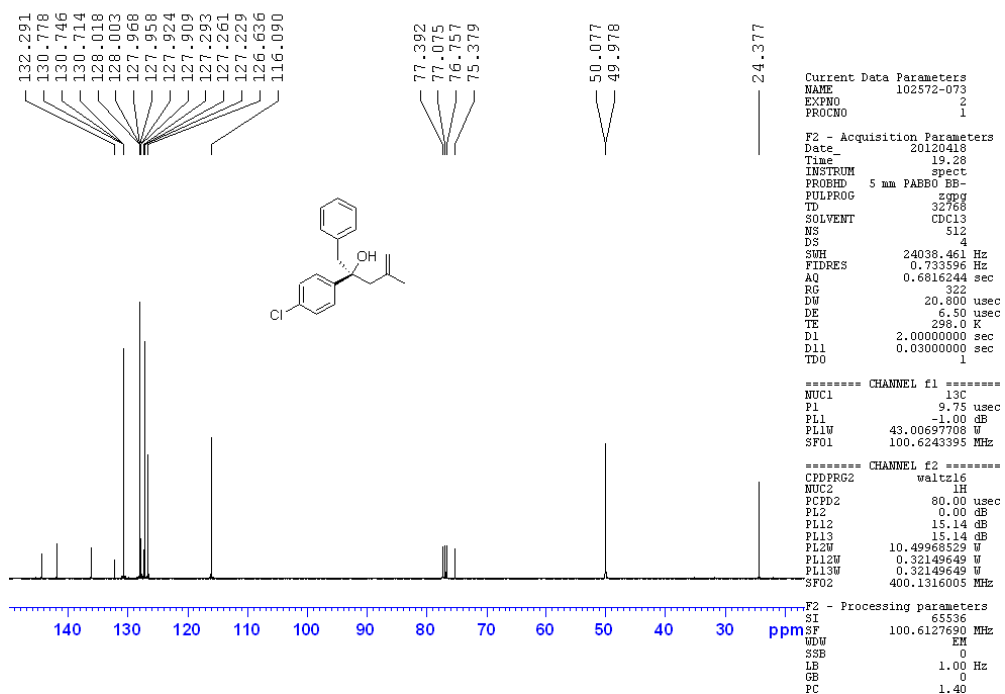

**(R)-2-(4-Bromophenyl)-4-methyl-1-phenylpent-4-en-2-ol 12f**

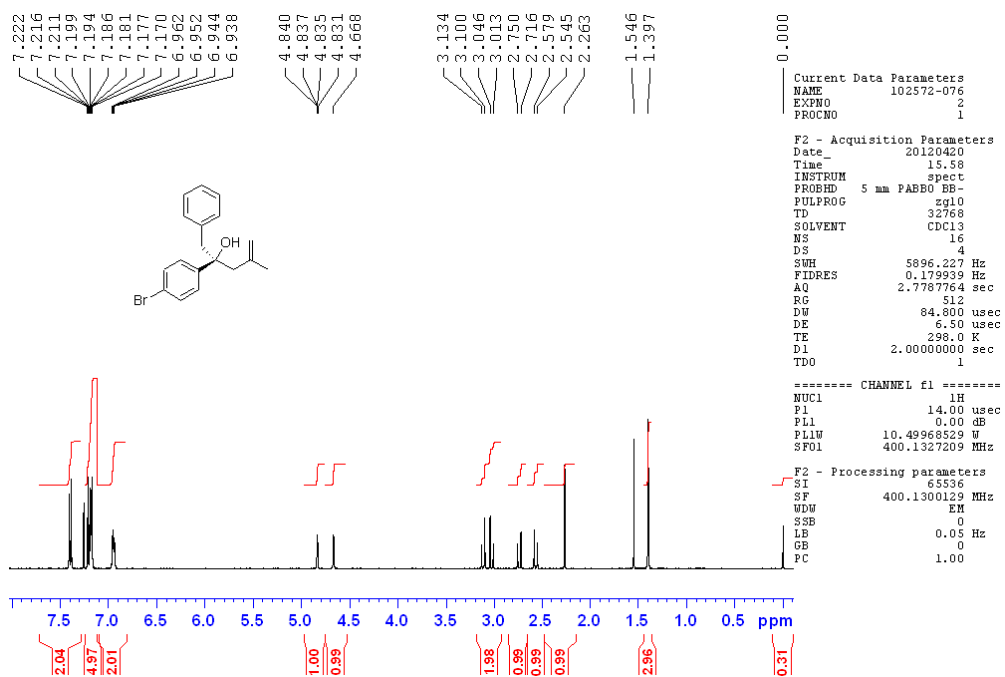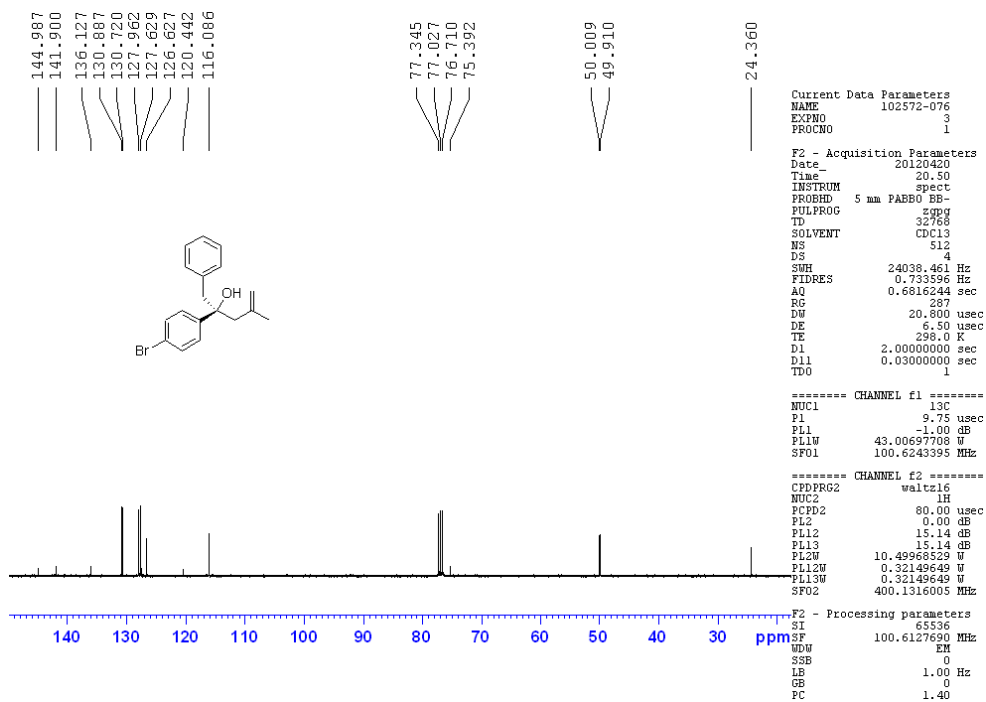

**(R)-2-(4-Methoxyphenyl)-4-methyl-1-(naphthalen-1-yl)pent-4-en-2-ol 12g**

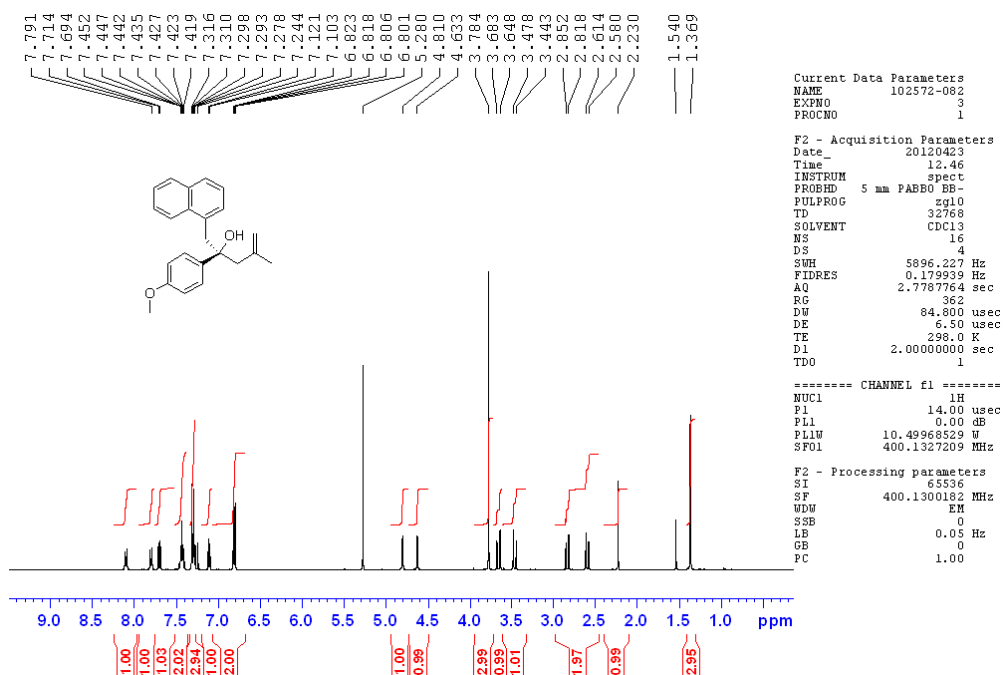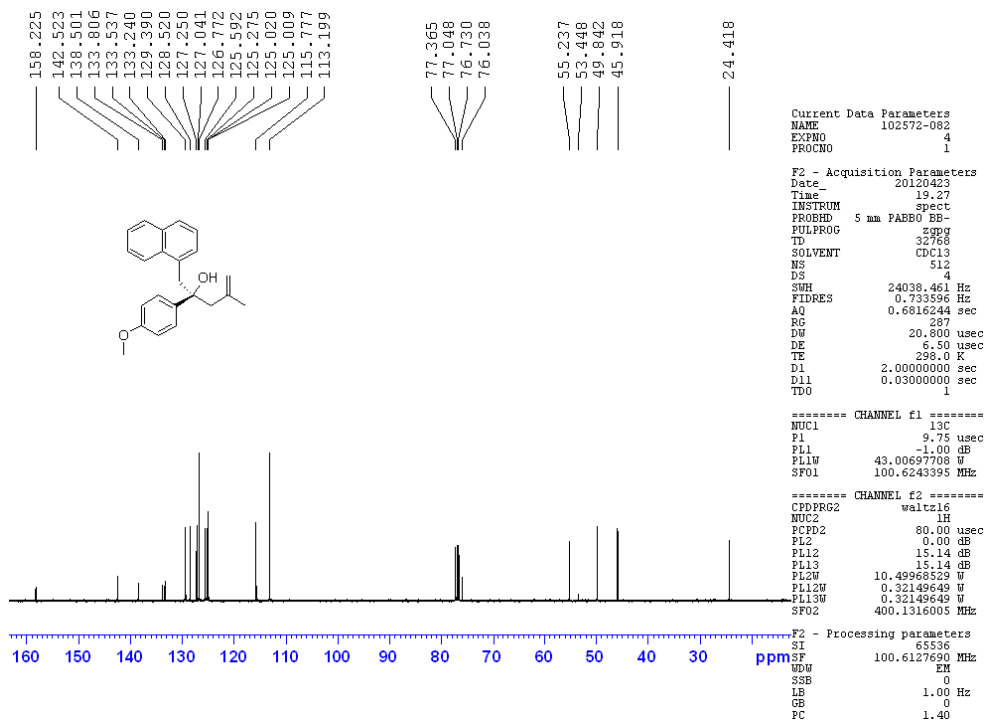

**(R)-2-(4-Methoxyphenyl)-4-methyl-1-(naphthalen-2-yl)pent-4-en-2-ol 12h**

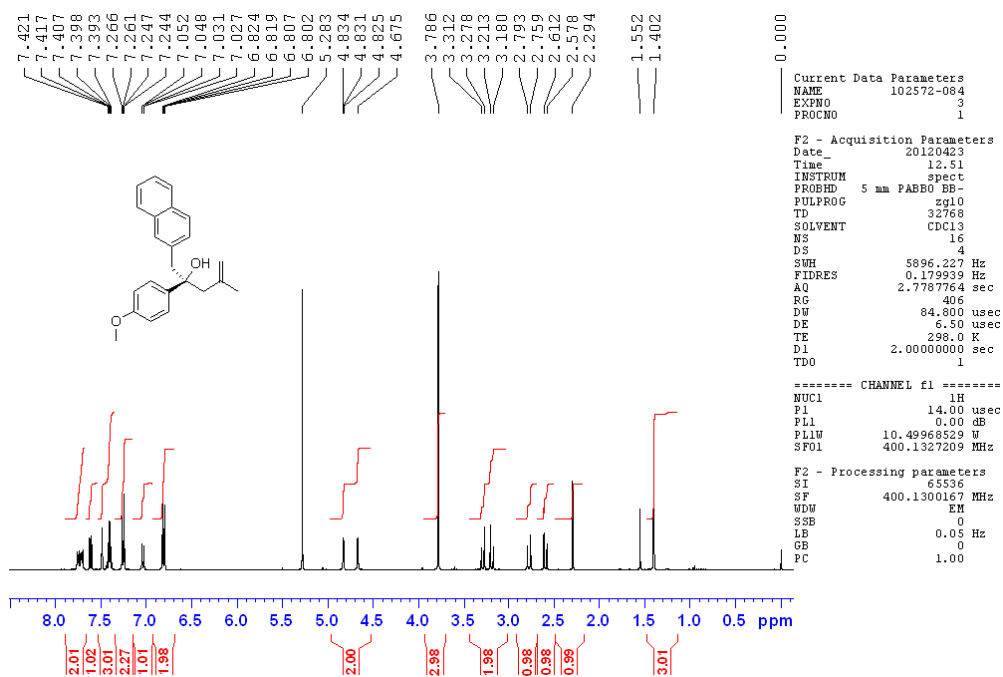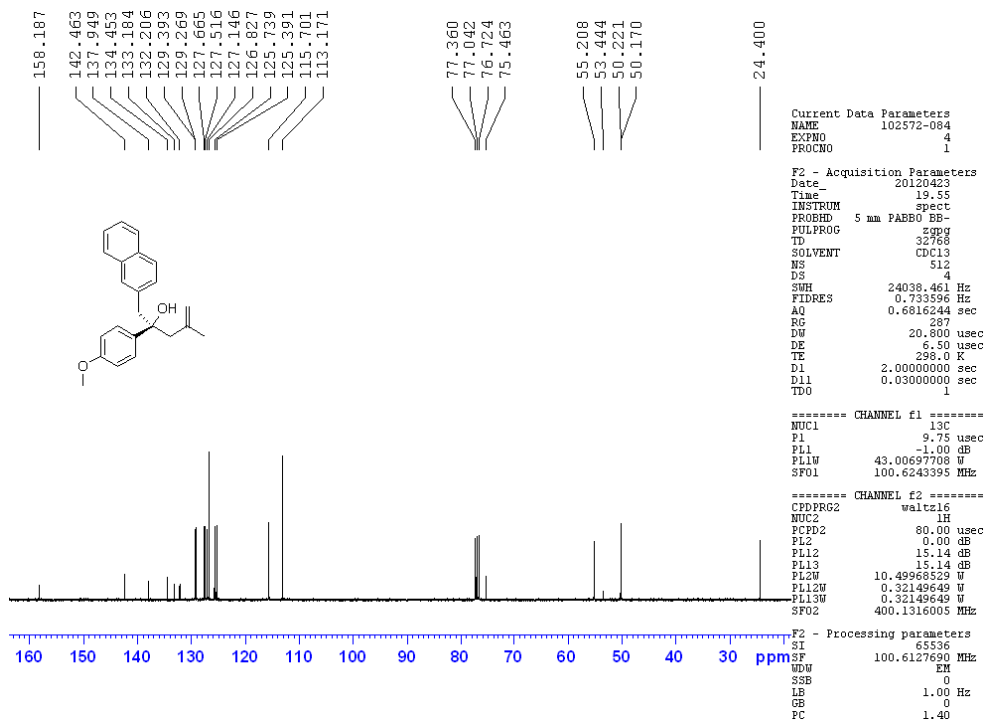



**(R)-1-Chloro-3-(4-fluorophenyl)-5-methylhex-5-en-3-ol 12i**

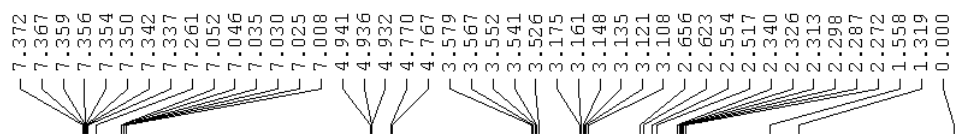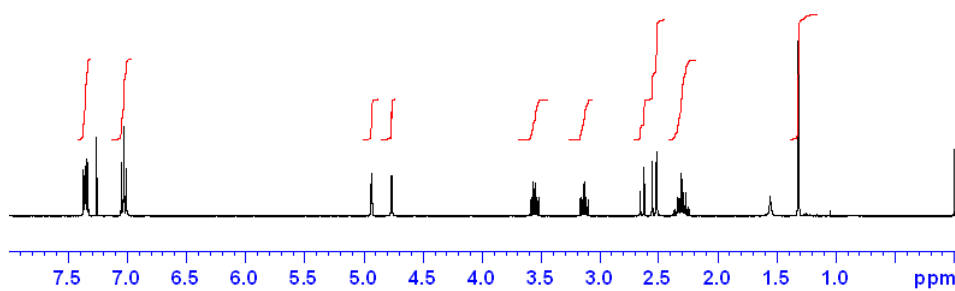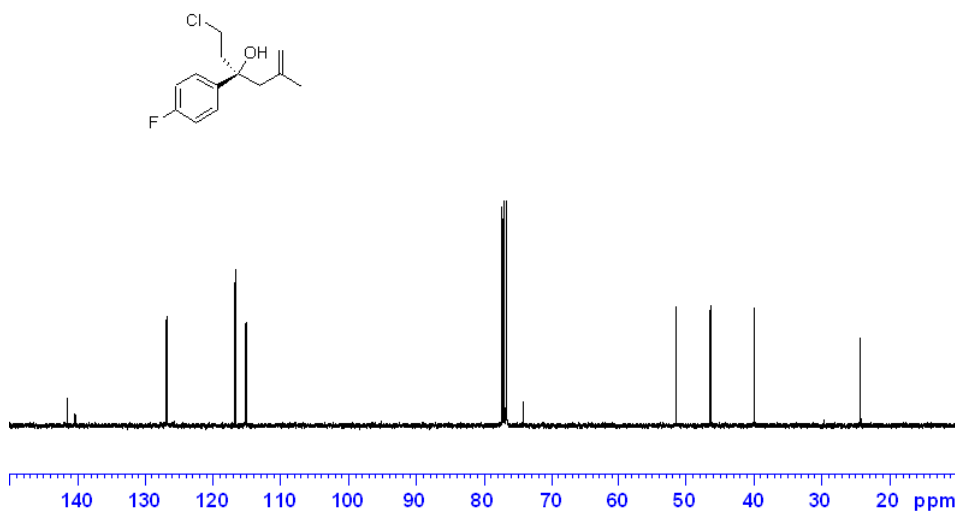

**(R)-4-Methyl-1-phenyl-2-(thiophen-3-yl)pent-4-en-2-ol 12j**

102665-030

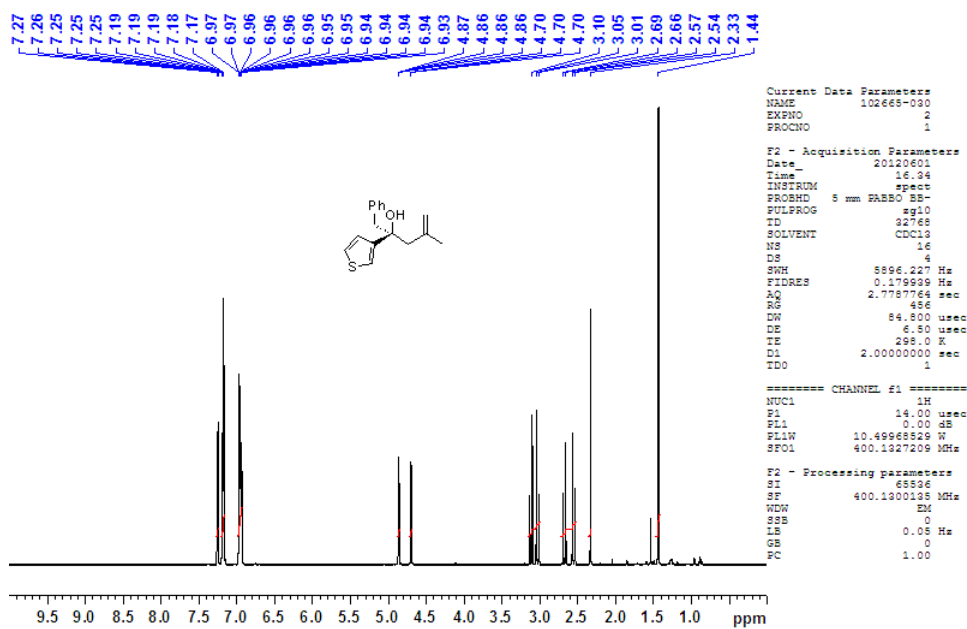

102665-030

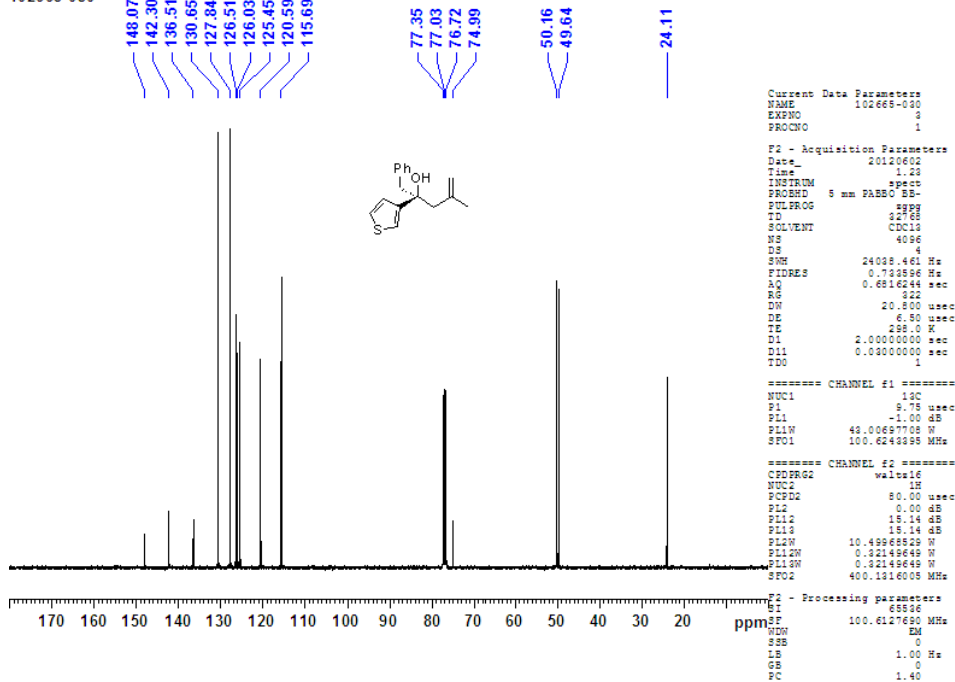

**(R)-4-Methyl-1-phenyl-2-(thiophen-3-yl)pent-4-en-2-ol 12k**

102665-038-H

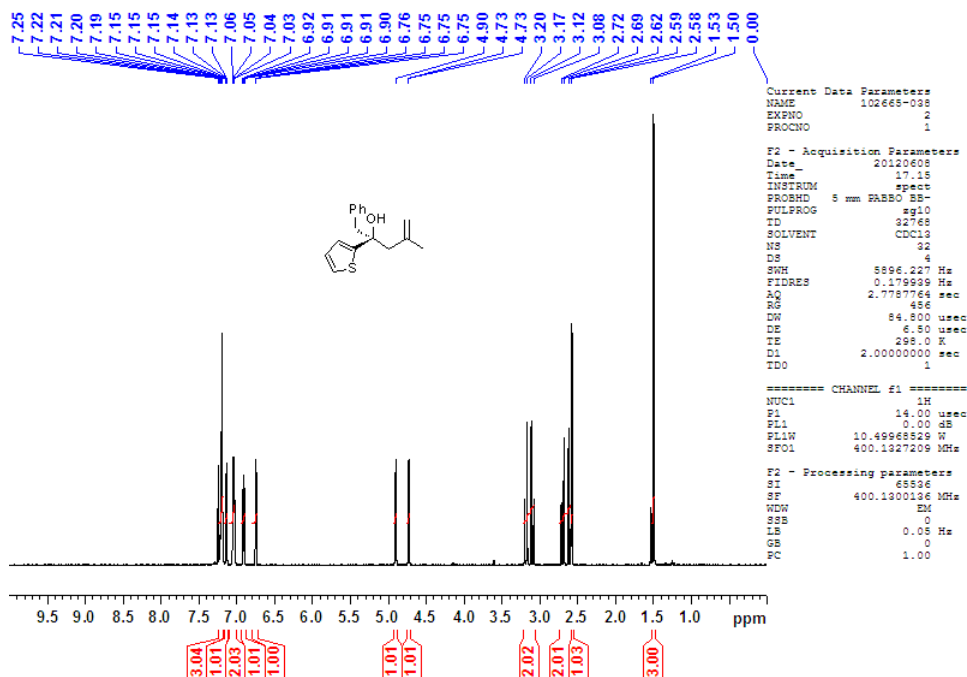

102665-038-C

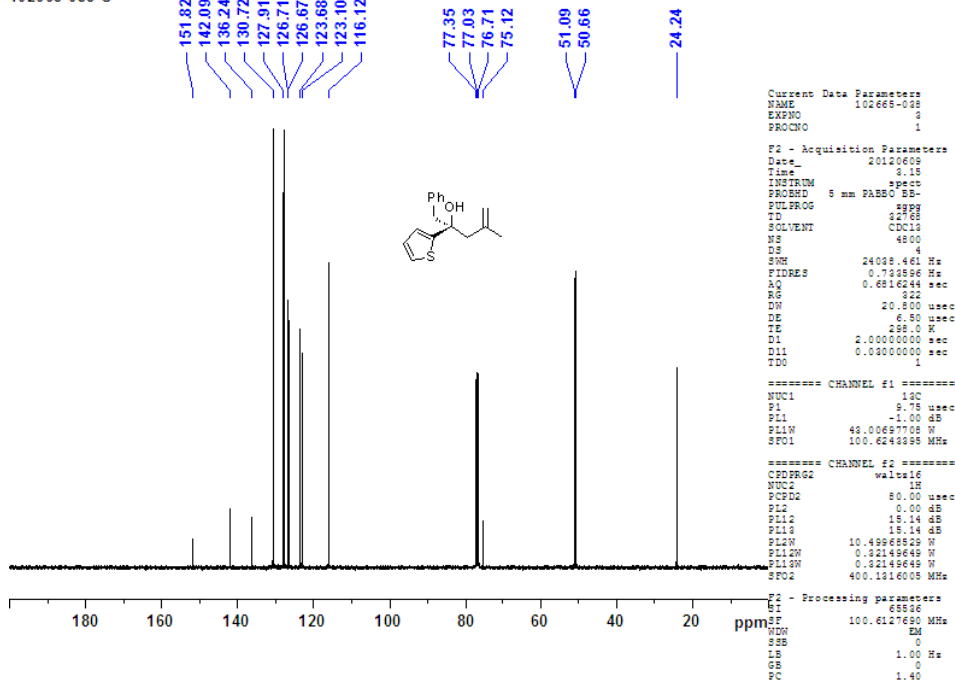

# **(S)-5-Methyl-1,3-diphenylhex-5-en-3-ol 12l**

102665-009

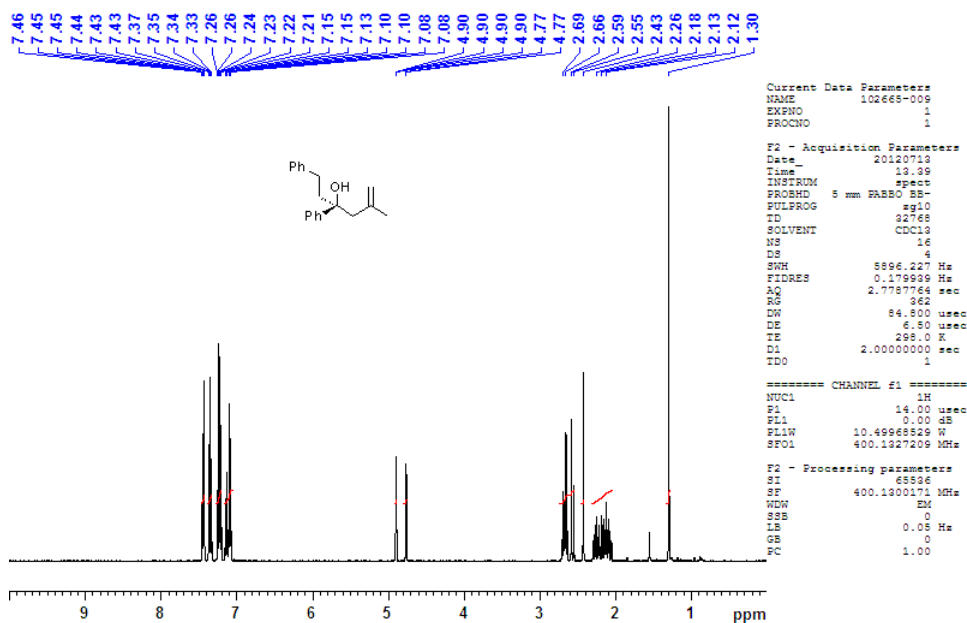

102665-009

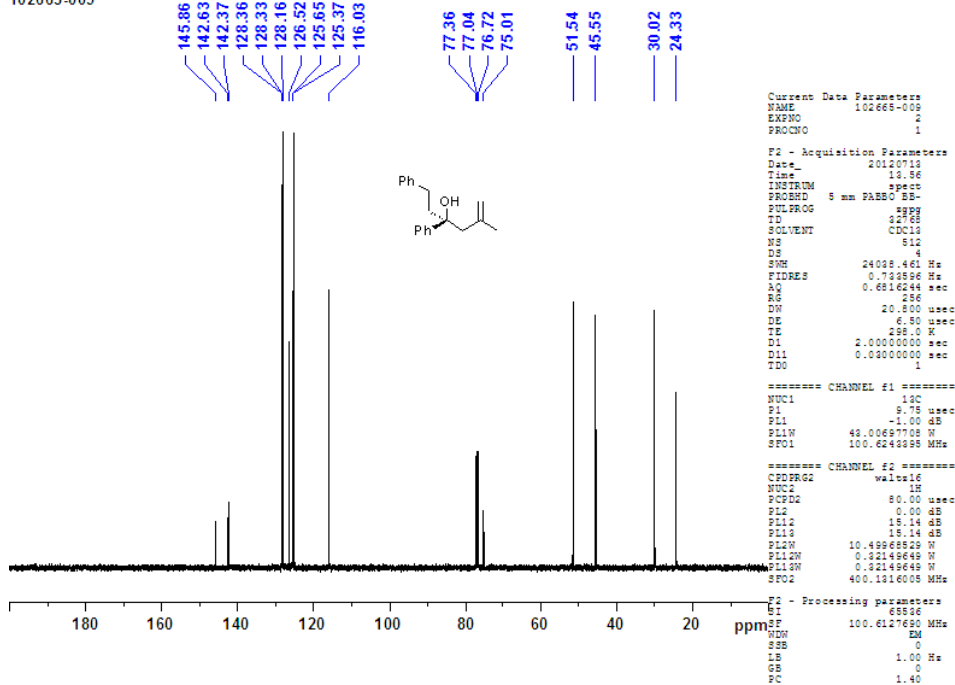

**(S)-2-Methyl-4,7-diphenylhept-1-en-4-ol 12m**

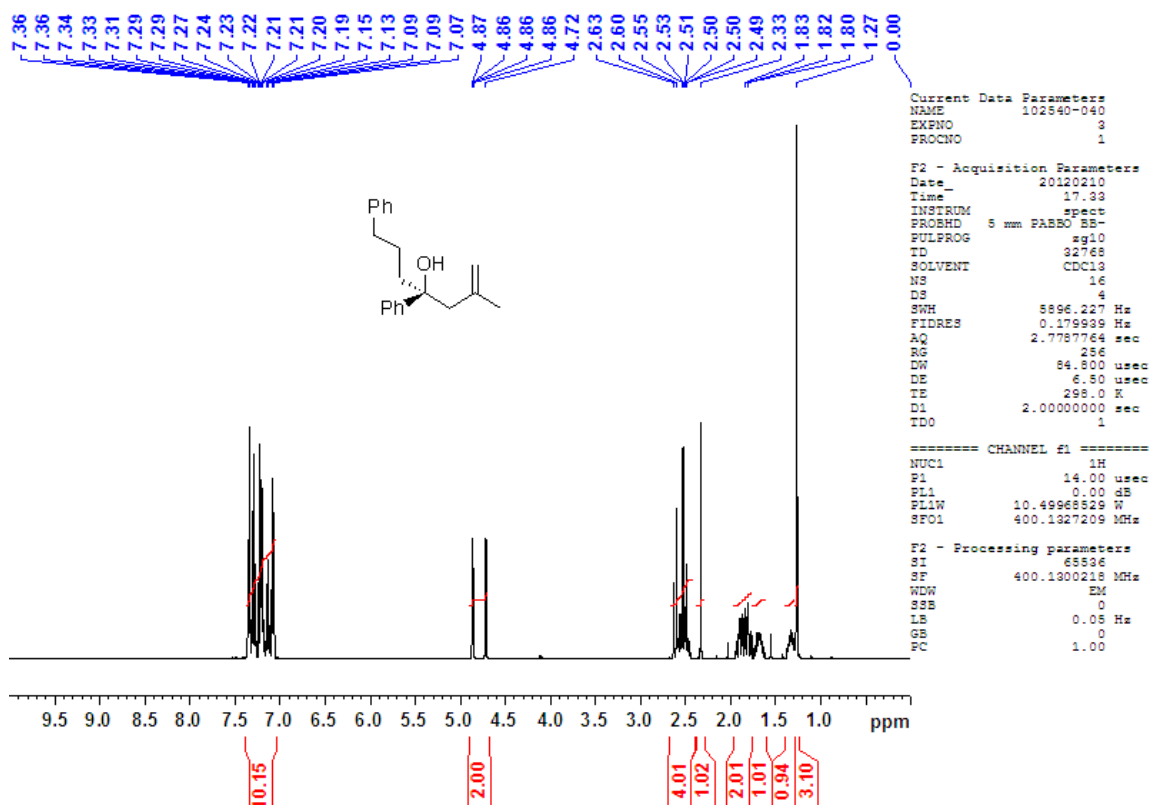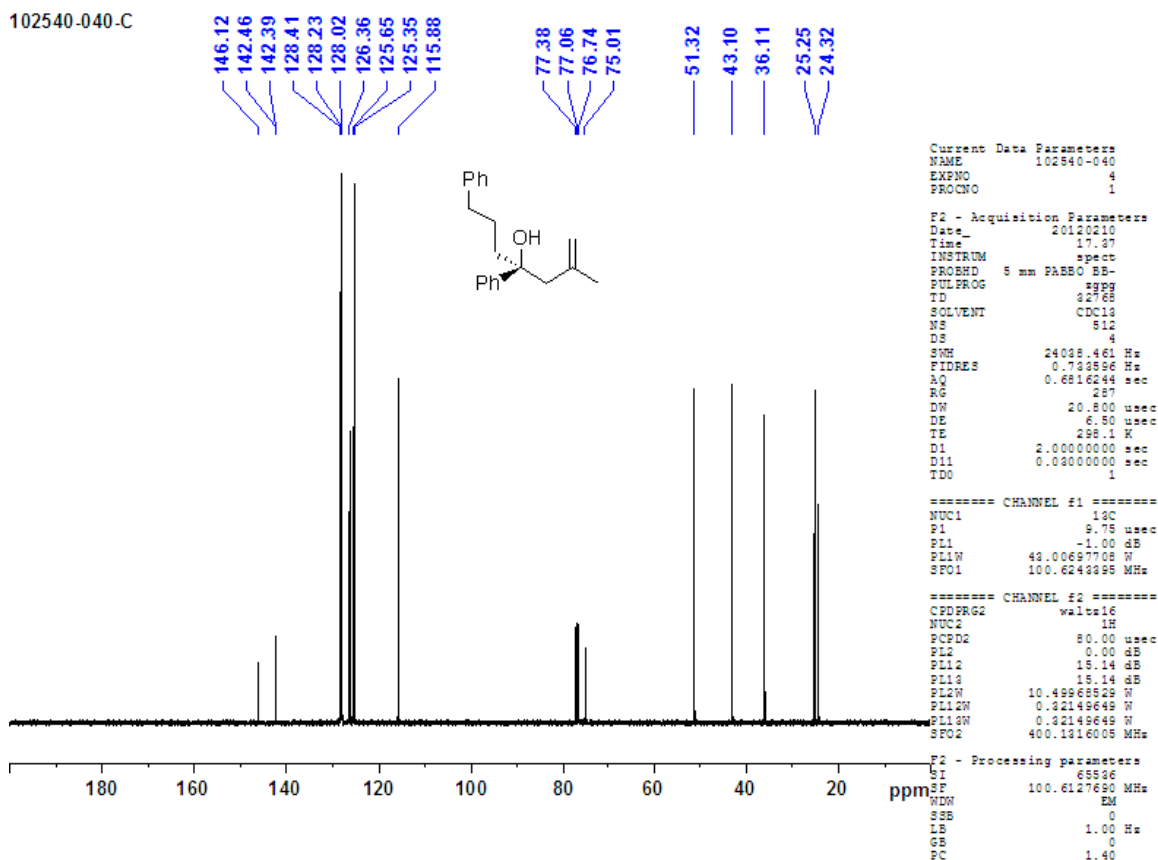

# **(R)-1-(Benzyloxy)-4-methyl-2-phenylpent-4-en-2-ol 12n**

102665-026

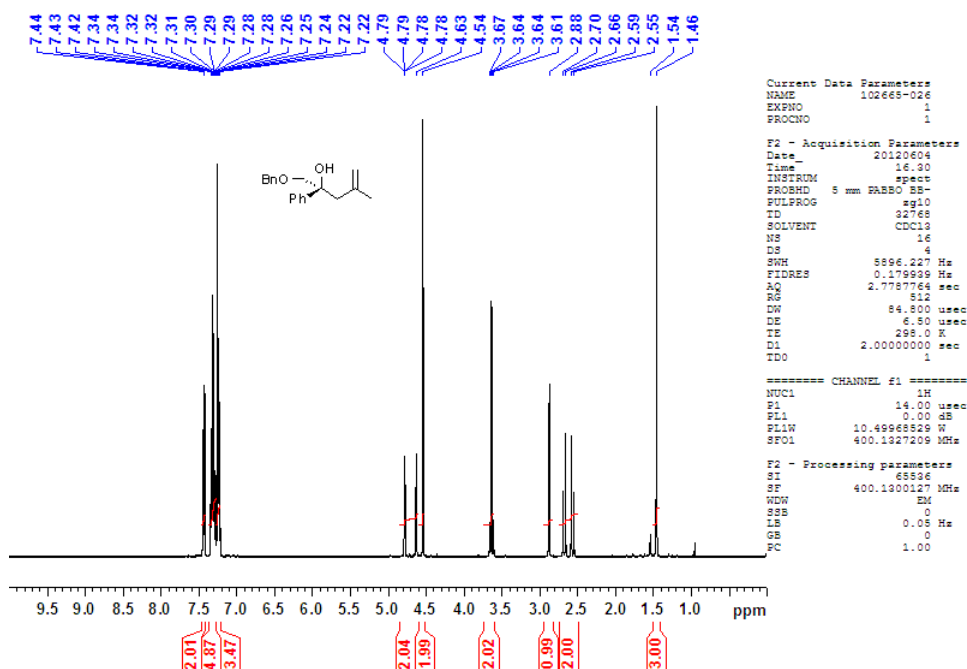

102665-026

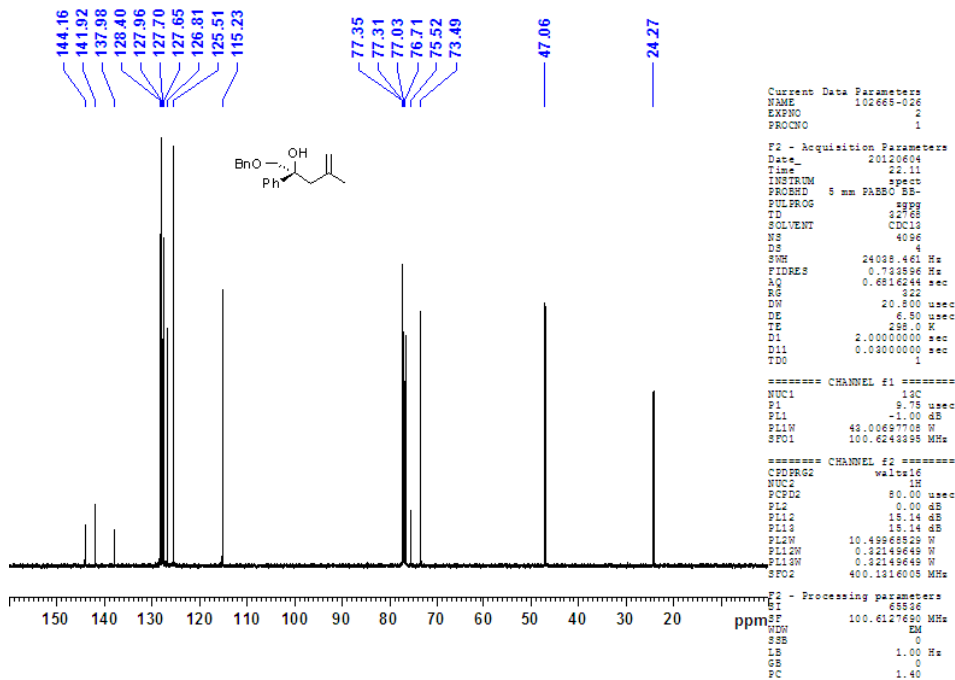

(S)-4-Methyl-2-phenylpent-4-en-2-ol 12o

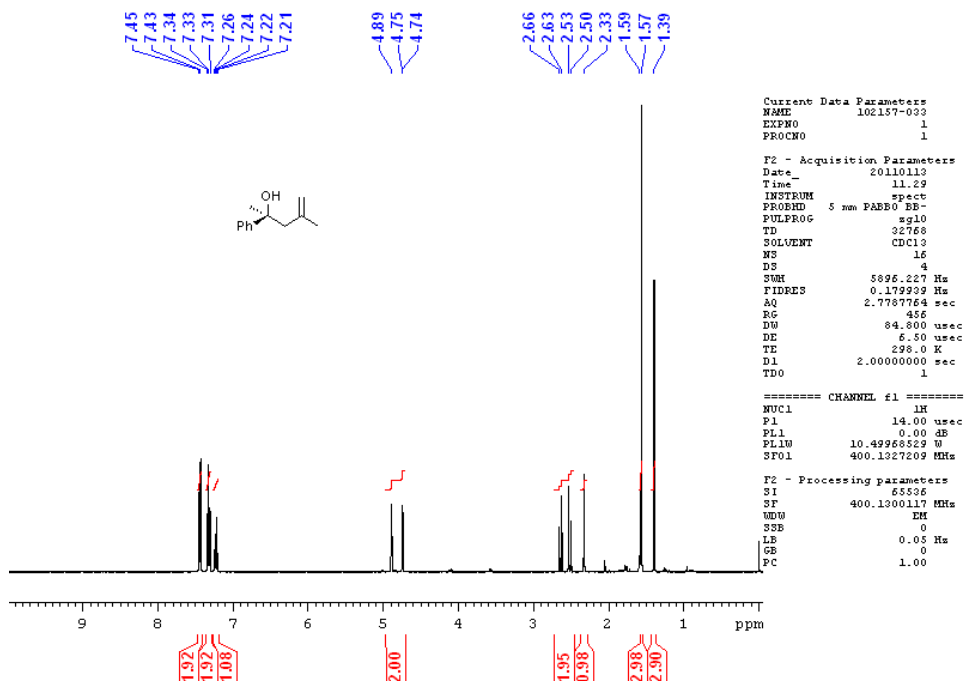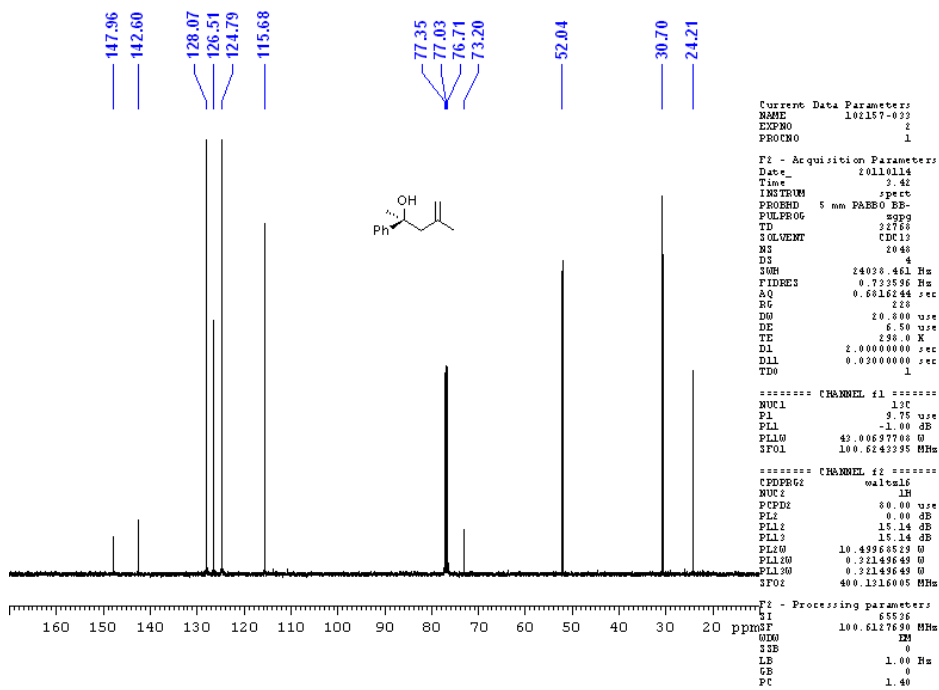

# **(R)-tert-Butyl 3-hydroxy-5-methyl-3-phenylhex-5-enoate 12p**

102665-024

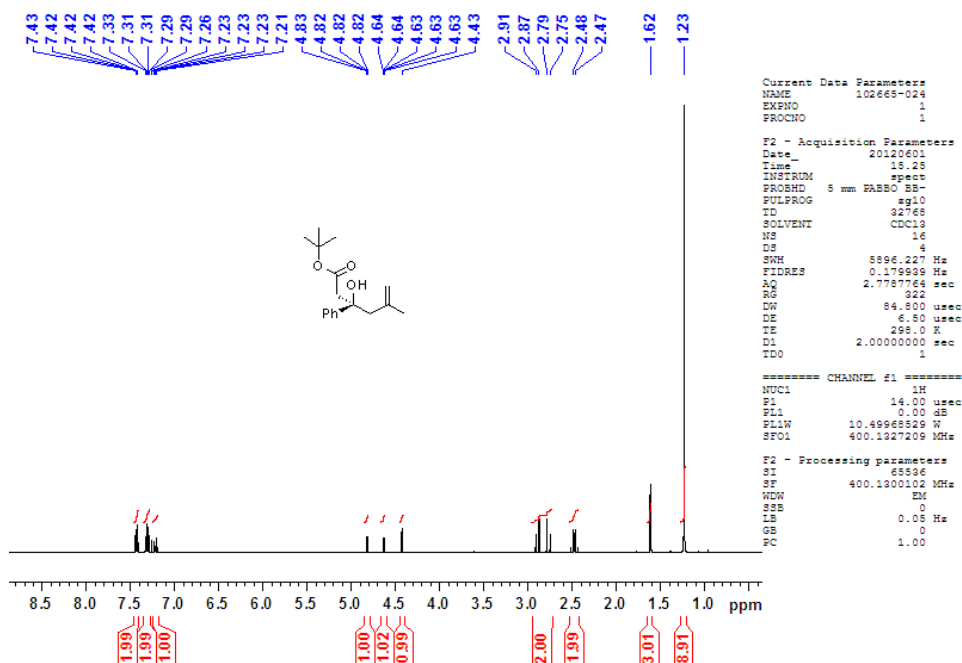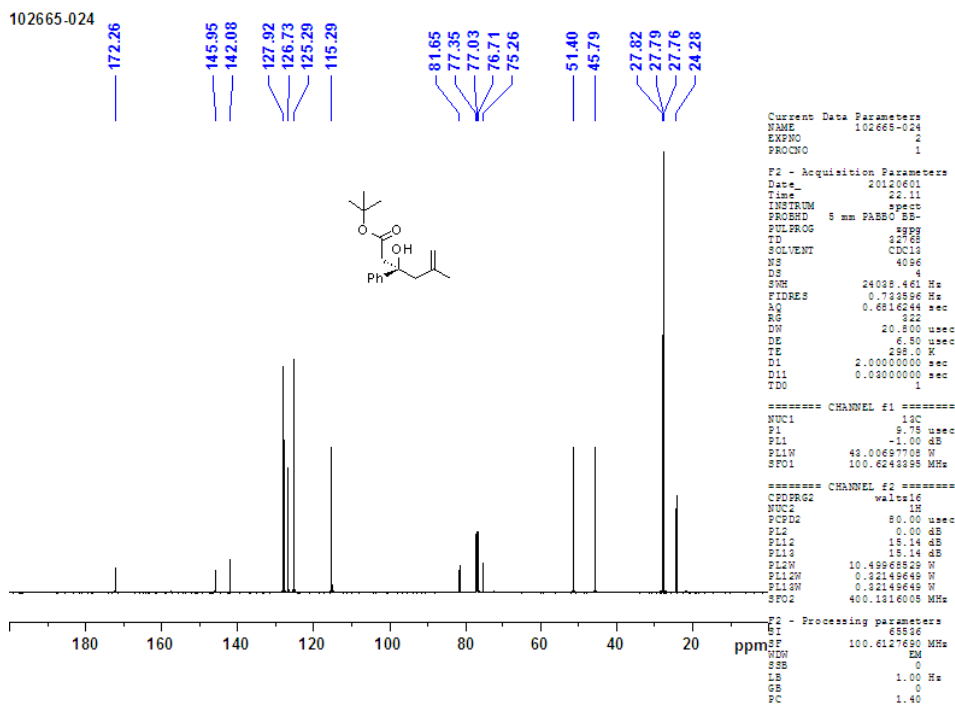



**(R)-tert-butyl 4-(6-(2-methylallyl)-2-oxo-6-phenyl-1,3-oxazinan-3-yl)piperidine-1-carboxylate 1**

102813-089

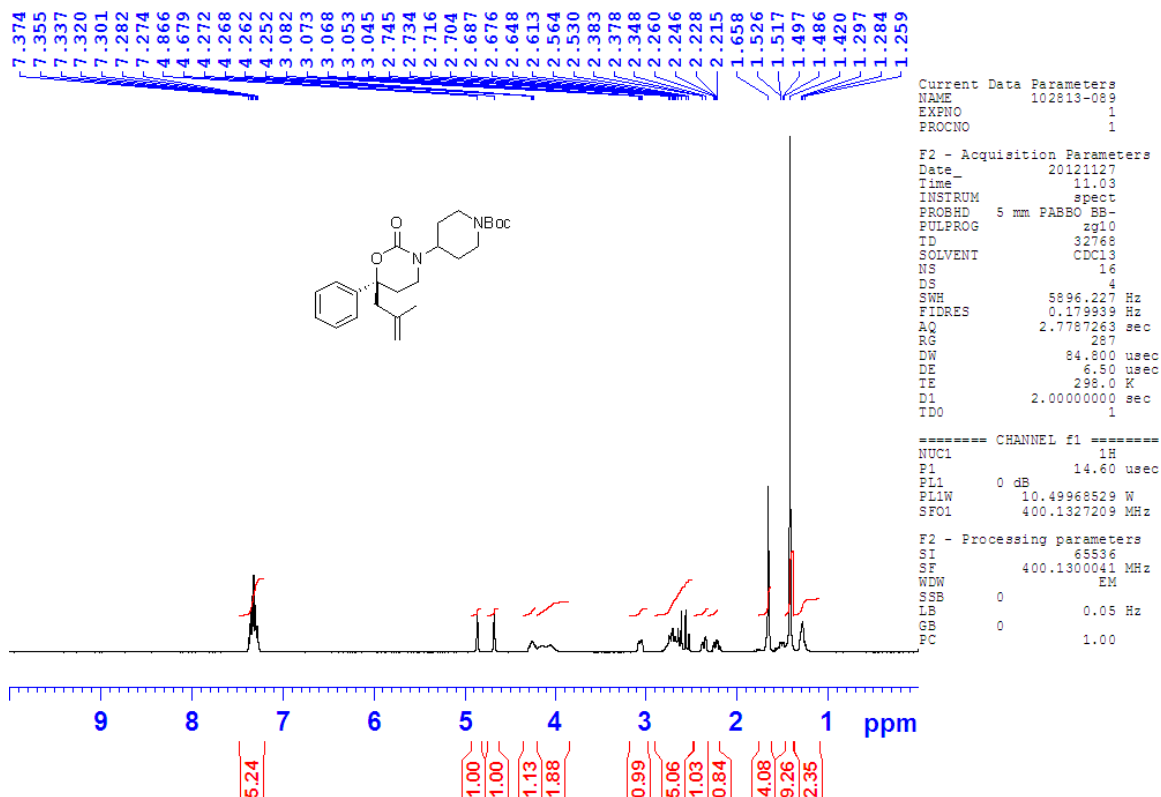

102813-089-C

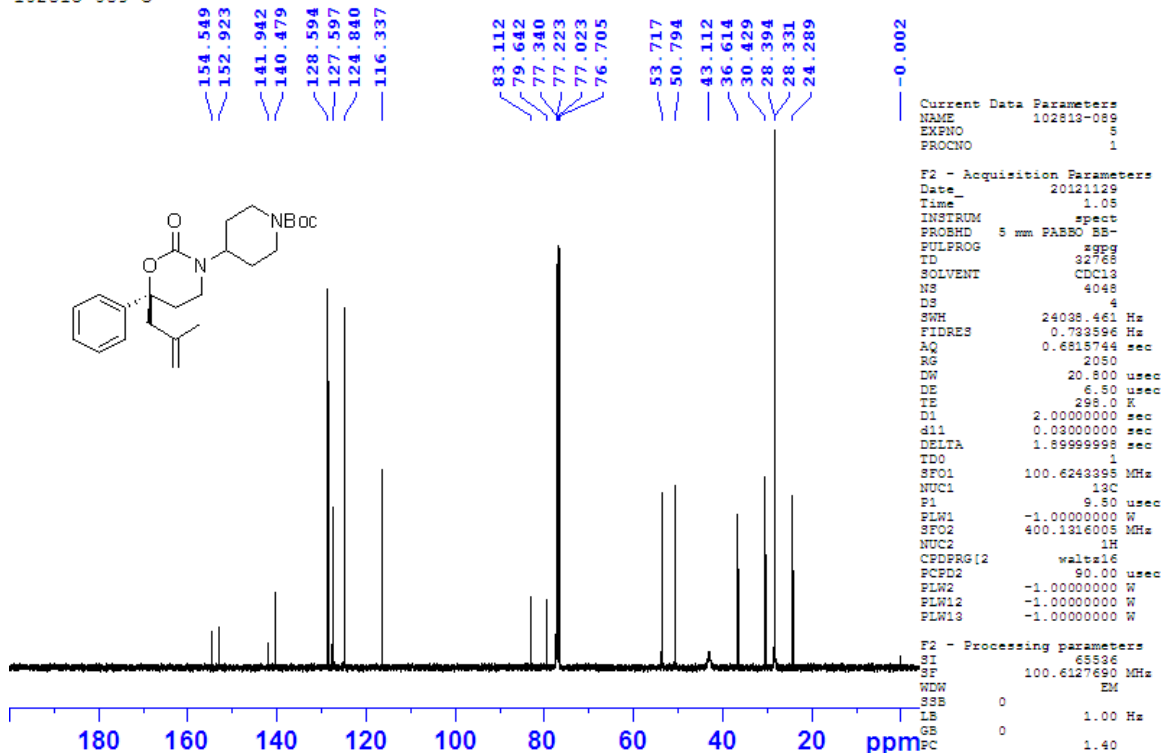

# **(R)-4-Methylene-1,2-diphenylhexan-2-ol 16**

102615-046-H

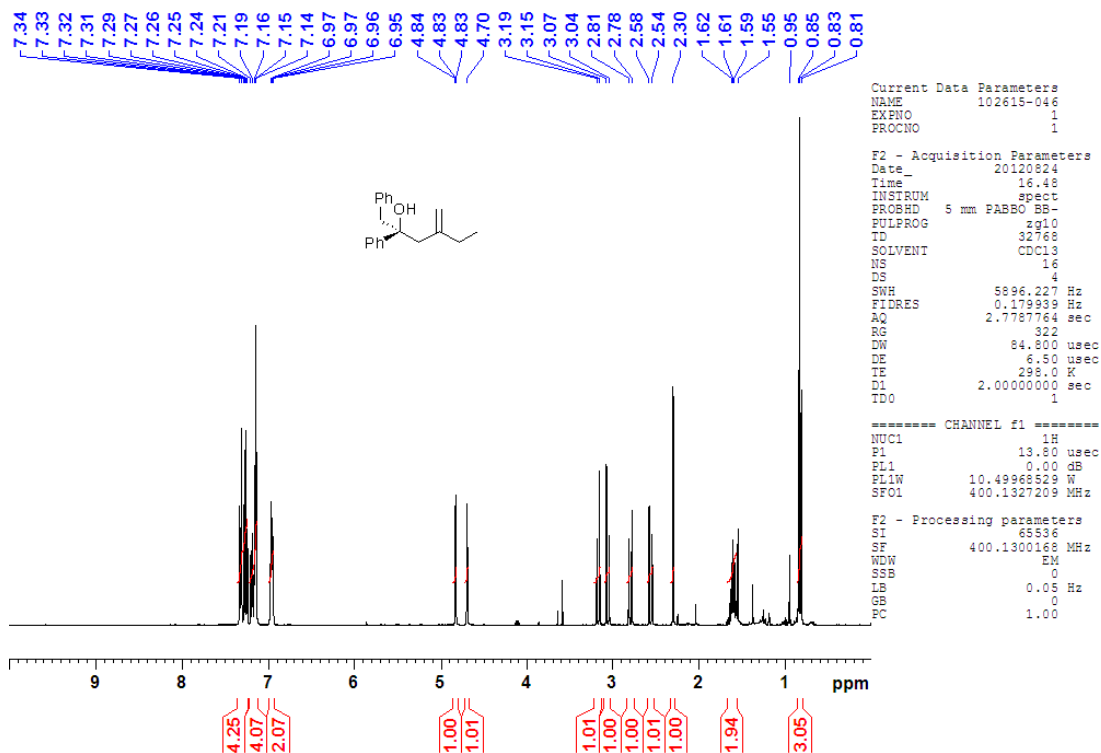

102615-046-H

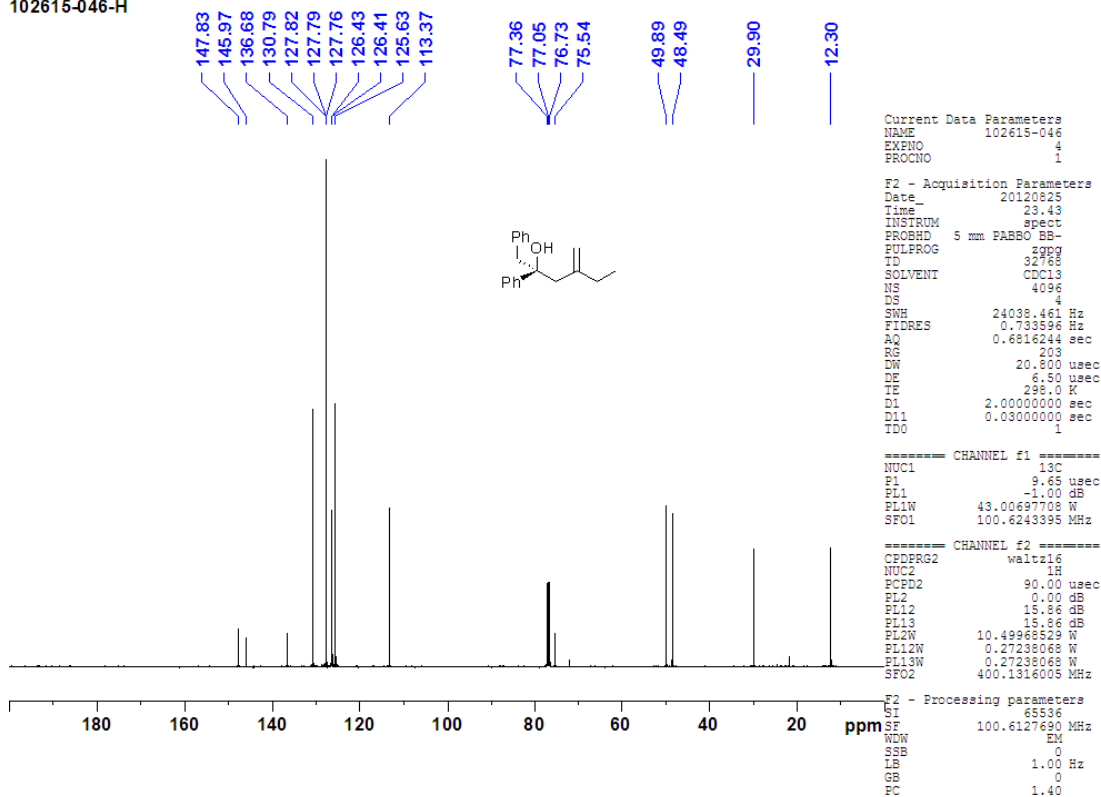

# **(R)-4-Methylene-1,2-diphenyloctan-2-ol 17**

102711-024

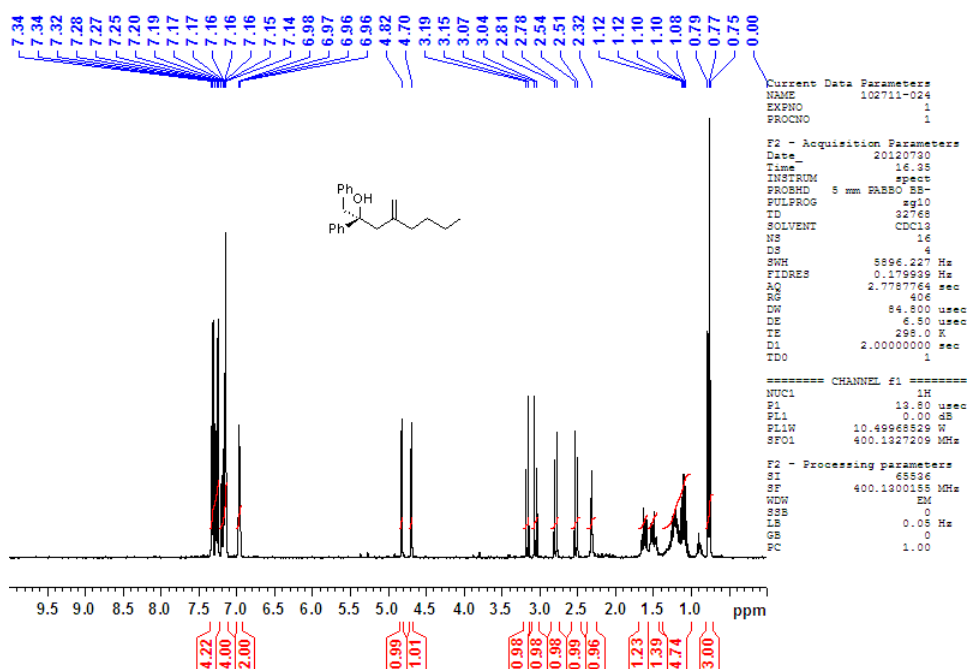

102711-024-C13

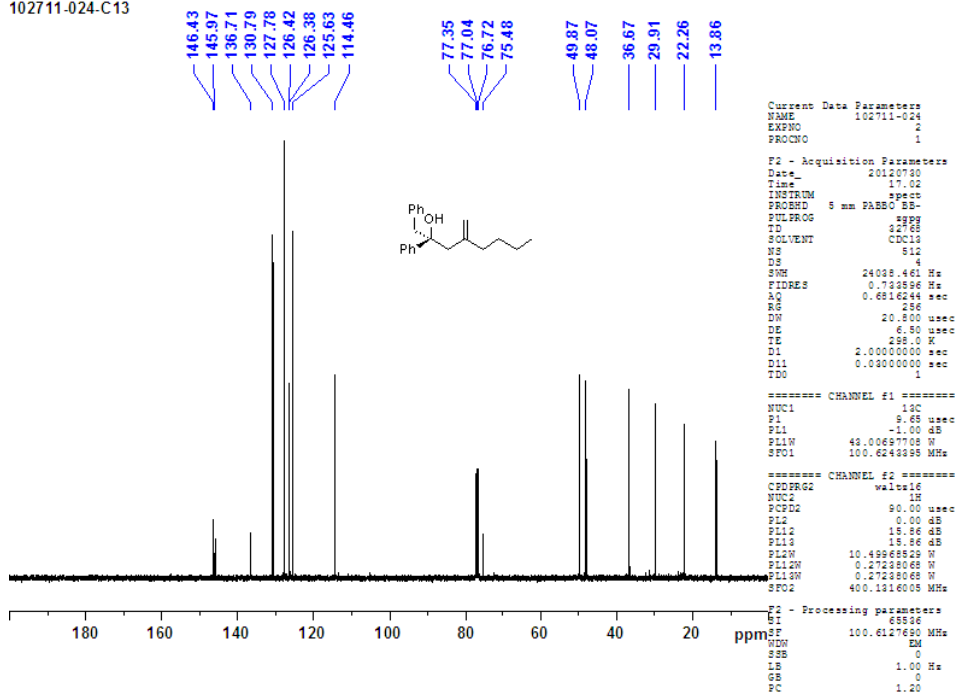

**(R)-4-Methyl-1,2-diphenylpent-4-en-2-ol 12a**

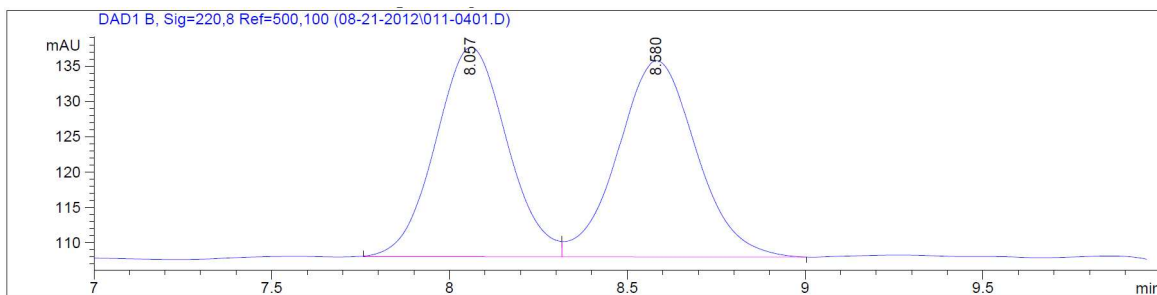

| Peak # | RetTime [min] | Type | Width [min] | Area [mAU*s] | Height [mAU] | Area %  |
|--------|---------------|------|-------------|--------------|--------------|---------|
| 1      | 8.057         | BV   | 0.2172      | 414.81424    | 29.64688     | 49.2910 |
| 2      | 8.580         | VB   | 0.2353      | 426.74731    | 27.76923     | 50.7090 |

Totals : 841.56155 57.41611

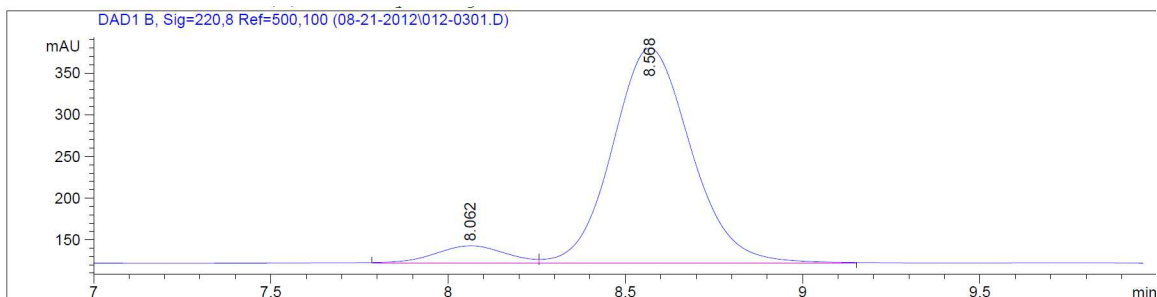

| Peak # | RetTime [min] | Type | Width [min] | Area [mAU*s] | Height [mAU] | Area %  |
|--------|---------------|------|-------------|--------------|--------------|---------|
| 1      | 8.062         | BV   | 0.2102      | 276.80423    | 20.41046     | 6.5591  |
| 2      | 8.568         | VB   | 0.2346      | 3943.35522   | 257.55811    | 93.4409 |

Totals : 4220.15945 277.96856

**(R)-1-(3-Methoxyphenyl)-4-methyl-2-phenylpent-4-en-2-ol 12b**

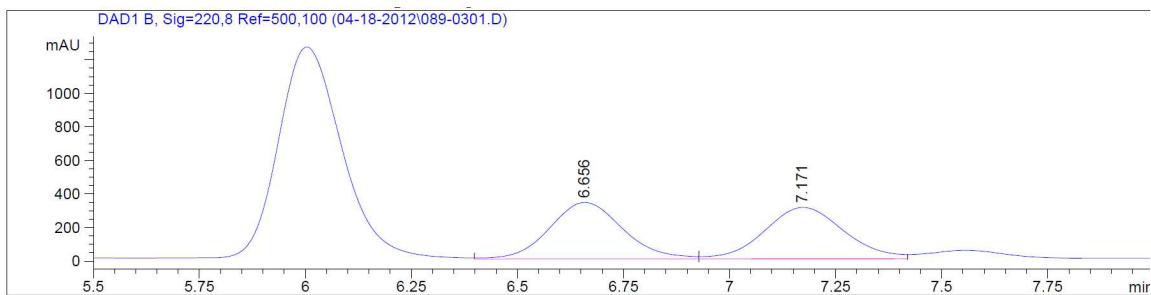

| Peak # | RetTime [min] | Type | Width [min] | Area [mAU*s] | Height [mAU] | Area %  |
|--------|---------------|------|-------------|--------------|--------------|---------|
| 1      | 6.656         | VV   | 0.1869      | 4072.97974   | 337.28018    | 50.3854 |
| 2      | 7.171         | VV   | 0.2027      | 4010.67310   | 306.36887    | 49.6146 |

Totals : 8083.65283 643.64905

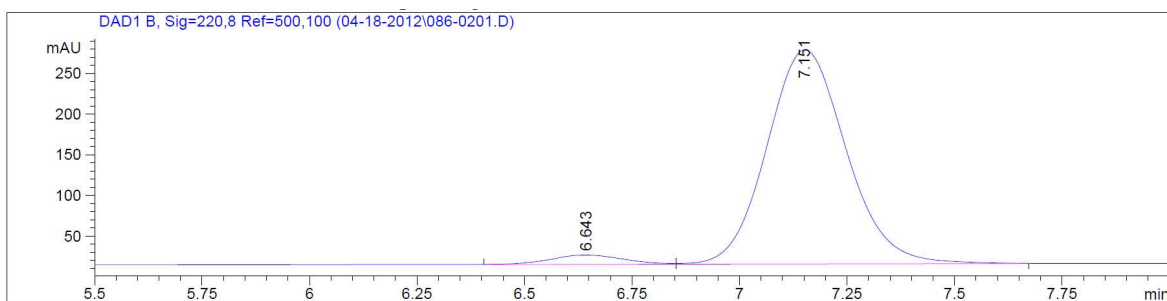

| Peak # | RetTime [min] | Type | Width [min] | Area [mAU*s] | Height [mAU] | Area %  |
|--------|---------------|------|-------------|--------------|--------------|---------|
| 1      | 6.643         | BV   | 0.1809      | 135.64973    | 11.55721     | 3.8567  |
| 2      | 7.151         | VB   | 0.1977      | 3381.61890   | 263.54947    | 96.1433 |

Totals : 3517.26863 275.10667

**(R)-2-(2-Methoxyphenyl)-4-methyl-1-phenylpent-4-en-2-ol 12c**

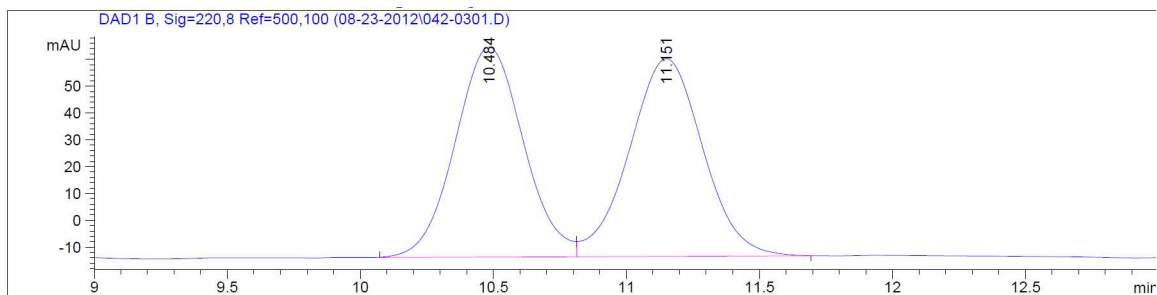

| Peak # | RetTime [min] | Type | Width [min] | Area [mAU*s] | Height [mAU] | Area %  |
|--------|---------------|------|-------------|--------------|--------------|---------|
| 1      | 10.484        | BV   | 0.2760      | 1394.80823   | 78.24401     | 49.6480 |
| 2      | 11.151        | VB   | 0.2960      | 1414.58472   | 73.68077     | 50.3520 |

Totals : 2809.39294 151.92478

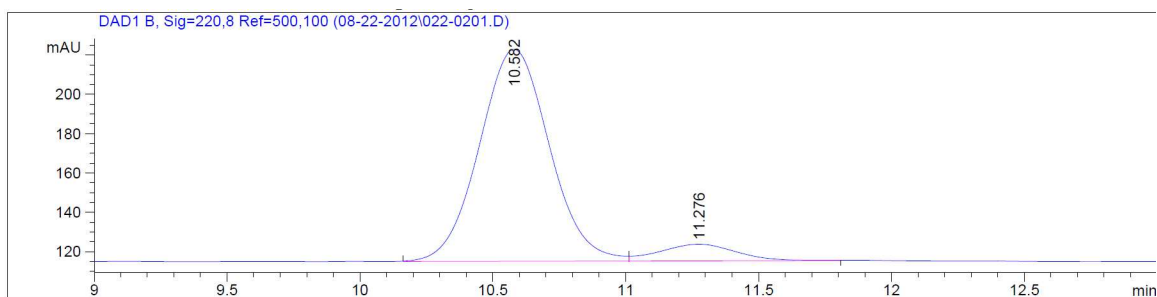

| Peak # | RetTime [min] | Type | Width [min] | Area [mAU*s] | Height [mAU] | Area %  |
|--------|---------------|------|-------------|--------------|--------------|---------|
| 1      | 10.582        | BV   | 0.2833      | 1969.88599   | 107.75513    | 92.1333 |
| 2      | 11.276        | VB   | 0.3043      | 168.19673    | 8.44598      | 7.8667  |

Totals : 2138.08272 116.20111

**(R)-2-(4-Fluorophenyl)-4-methyl-1-phenylpent-4-en-2-ol 12d**

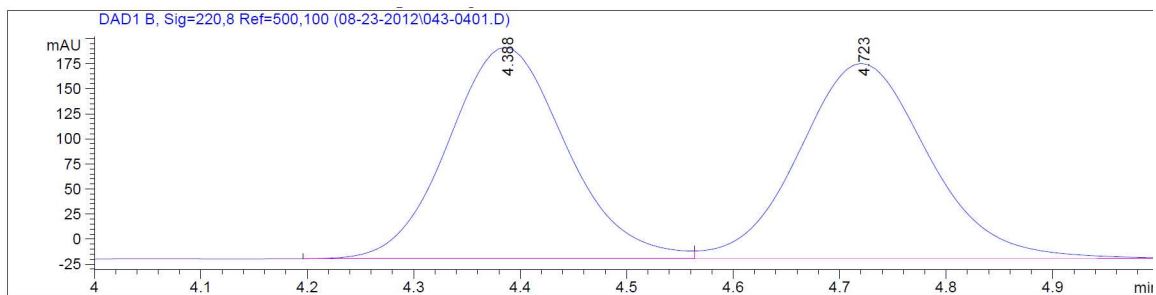

| Peak # | RetTime [min] | Type | Width [min] | Area [mAU*s] | Height [mAU] | Area %  |
|--------|---------------|------|-------------|--------------|--------------|---------|
| 1      | 4.388         | BV   | 0.1201      | 1629.31494   | 211.03214    | 49.5229 |
| 2      | 4.723         | VV   | 0.1294      | 1660.70715   | 194.92235    | 50.4771 |

Totals : 3290.02209 405.95448

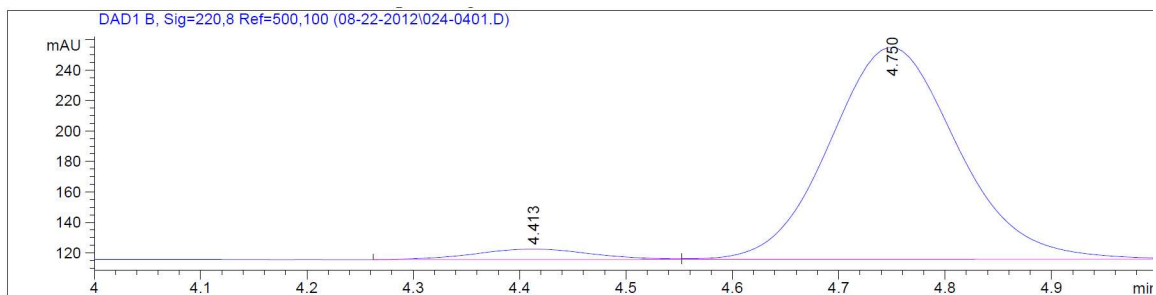

| Peak # | RetTime [min] | Type | Width [min] | Area [mAU*s] | Height [mAU] | Area %  |
|--------|---------------|------|-------------|--------------|--------------|---------|
| 1      | 4.413         | BV   | 0.1170      | 50.69893     | 6.79719      | 4.1702  |
| 2      | 4.750         | VB   | 0.1297      | 1165.04358   | 139.14168    | 95.8298 |

Totals : 1215.74251 145.93887

**(R)-2-(4-Chlorophenyl)-4-methyl-1-phenylpent-4-en-2-ol 12e**

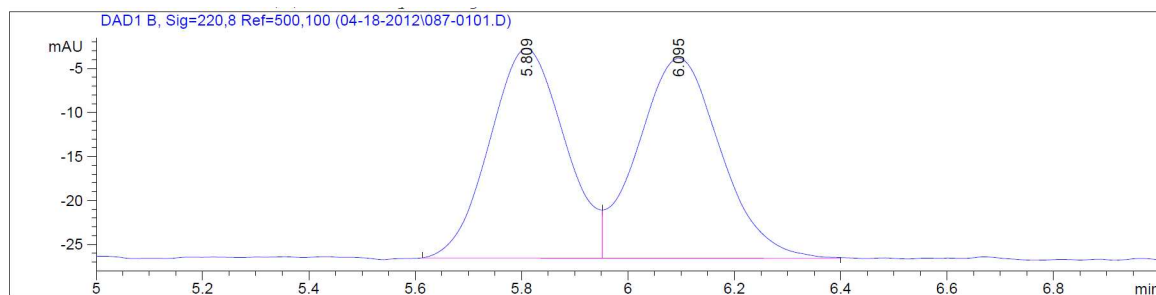

| Peak # | RetTime [min] | Type | Width [min] | Area [mAU*s] | Height [mAU] | Area %  |
|--------|---------------|------|-------------|--------------|--------------|---------|
| 1      | 5.809         | BV   | 0.1544      | 233.62427    | 23.82161     | 48.6751 |
| 2      | 6.095         | VB   | 0.1645      | 246.34253    | 22.72545     | 51.3249 |

Totals : 479.96680 46.54706

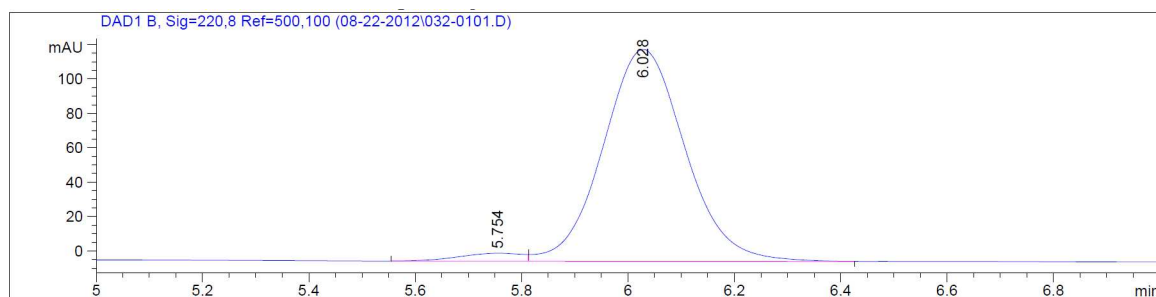

| Peak # | RetTime [min] | Type | Width [min] | Area [mAU*s] | Height [mAU] | Area %  |
|--------|---------------|------|-------------|--------------|--------------|---------|
| 1      | 5.754         | BV   | 0.1259      | 37.21839     | 4.52992      | 2.7425  |
| 2      | 6.028         | VB   | 0.1649      | 1319.85571   | 123.25403    | 97.2575 |

Totals : 1357.07410 127.78395



**(R)-2-(4-bromophenyl)-4-methyl-1-phenylpent-4-en-2-ol 12f**

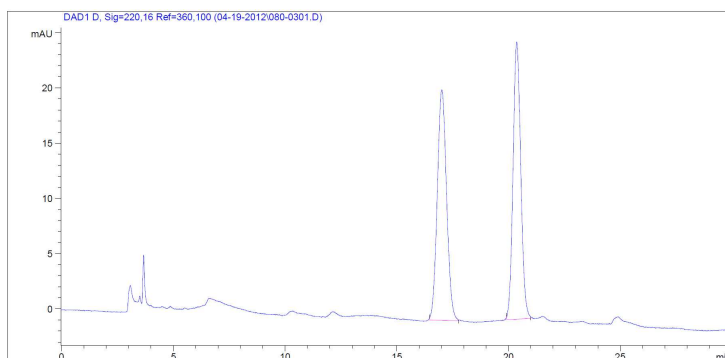

| Peak # | RetTime [min] | Type | Width [min] | Area [mAU*s] | Height [mAU] | Area %  |
|--------|---------------|------|-------------|--------------|--------------|---------|
| 1      | 17.019        | BB   | 0.4378      | 603.79785    | 20.85466     | 50.2976 |
| 2      | 20.372        | BB   | 0.3719      | 596.65350    | 25.04594     | 49.7024 |

Totals : 1200.45135 45.90060

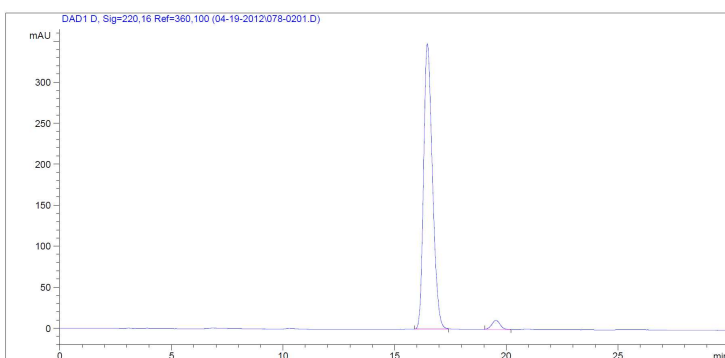

| Peak # | RetTime [min] | Type | Width [min] | Area [mAU*s] | Height [mAU] | Area %  |
|--------|---------------|------|-------------|--------------|--------------|---------|
| 1      | 16.472        | BB   | 0.4268      | 9634.00586   | 348.17361    | 97.0468 |
| 2      | 19.544        | BB   | 0.3992      | 293.17133    | 11.20531     | 2.9532  |

Totals : 9927.17719 359.37892

**(R)-2-(4-Methoxyphenyl)-4-methyl-1-(naphthalen-1-yl)pent-4-en-2-ol 12g**

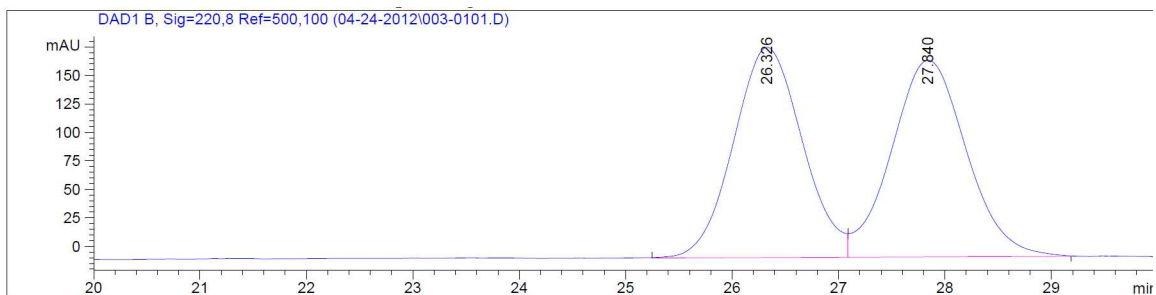

| Peak # | RetTime [min] | Type | Width [min] | Area [mAU*s] | Height [mAU] | Area %  |
|--------|---------------|------|-------------|--------------|--------------|---------|
| 1      | 26.326        | VV   | 0.6579      | 8287.64160   | 184.54683    | 49.5631 |
| 2      | 27.840        | VB   | 0.7081      | 8433.74512   | 172.57779    | 50.4369 |

Totals : 1.67214e4 357.12462

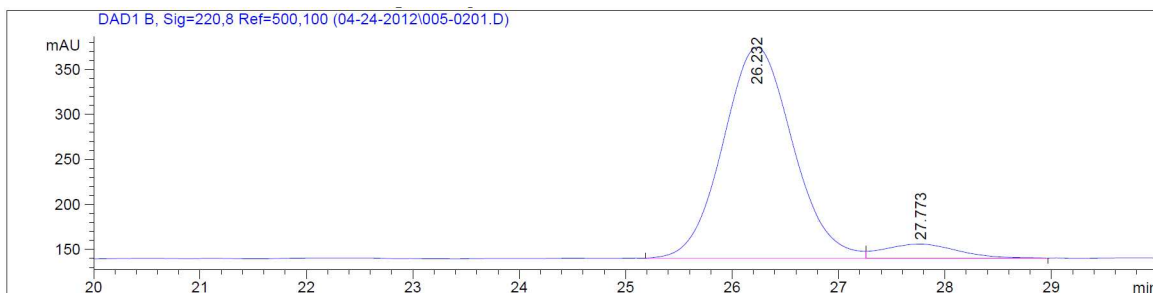

| Peak # | RetTime [min] | Type | Width [min] | Area [mAU*s] | Height [mAU] | Area %  |
|--------|---------------|------|-------------|--------------|--------------|---------|
| 1      | 26.232        | BV   | 0.6838      | 1.07003e4    | 234.72682    | 93.2776 |
| 2      | 27.773        | VV   | 0.5816      | 771.15674    | 15.85055     | 6.7224  |

Totals : 1.14715e4 250.57737

**(R)-2-(4-methoxyphenyl)-4-methyl-1-(naphthalen-2-yl)pent-4-en-2-ol 12h**

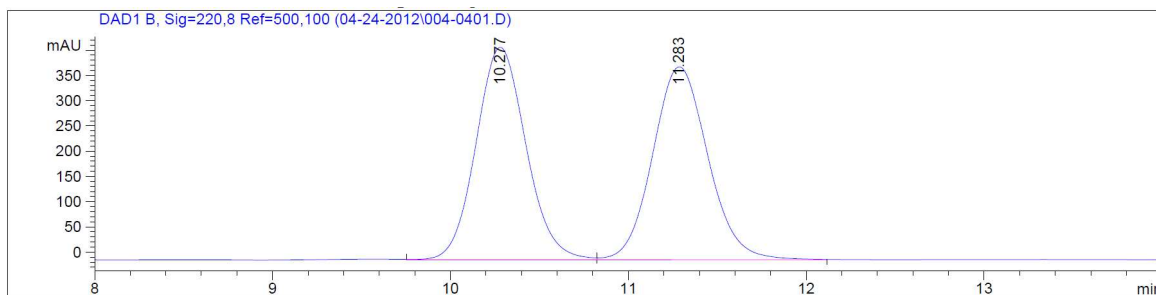

| Peak # | RetTime [min] | Type | Width [min] | Area [mAU*s] | Height [mAU] | Area %  |
|--------|---------------|------|-------------|--------------|--------------|---------|
| 1      | 10.277        | VV   | 0.3044      | 8240.25391   | 420.97717    | 49.9634 |
| 2      | 11.283        | VB   | 0.3338      | 8252.31152   | 382.33133    | 50.0366 |

Totals : 1.64926e4 803.30850

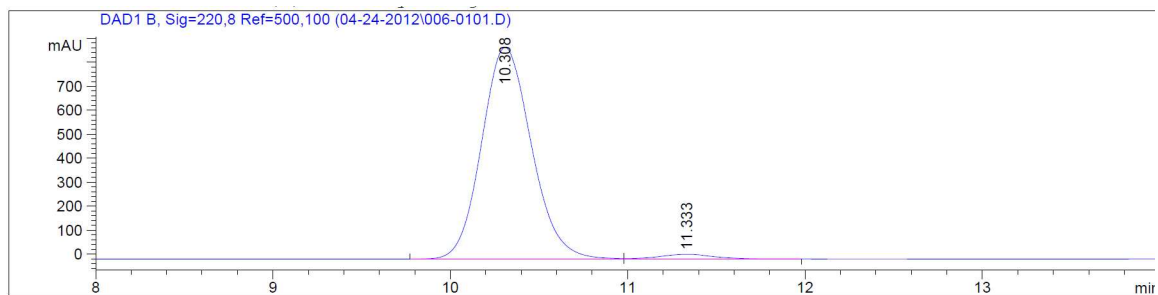

| Peak # | RetTime [min] | Type | Width [min] | Area [mAU*s] | Height [mAU] | Area %  |
|--------|---------------|------|-------------|--------------|--------------|---------|
| 1      | 10.308        | BV   | 0.3036      | 1.72128e4    | 882.19946    | 97.6047 |
| 2      | 11.333        | VB   | 0.3187      | 422.42014    | 19.50048     | 2.3953  |

Totals : 1.76352e4 901.69994

**(R)-1-Chloro-3-(4-fluorophenyl)-5-methylhex-5-en-3-ol 12i**

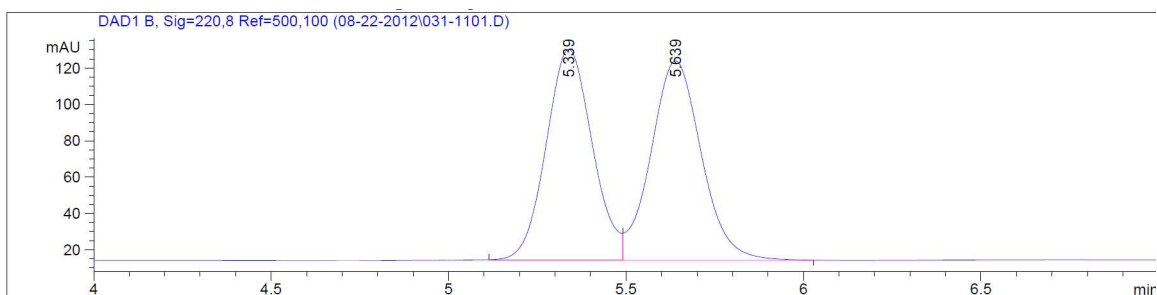

| Peak # | RetTime [min] | Type | Width [min] | Area [mAU*s] | Height [mAU] | Area %  |
|--------|---------------|------|-------------|--------------|--------------|---------|
| 1      | 5.339         | BV   | 0.1416      | 1052.29944   | 116.29847    | 49.1793 |
| 2      | 5.639         | VB   | 0.1534      | 1087.41907   | 109.94777    | 50.8207 |

Totals : 2139.71851 226.24624

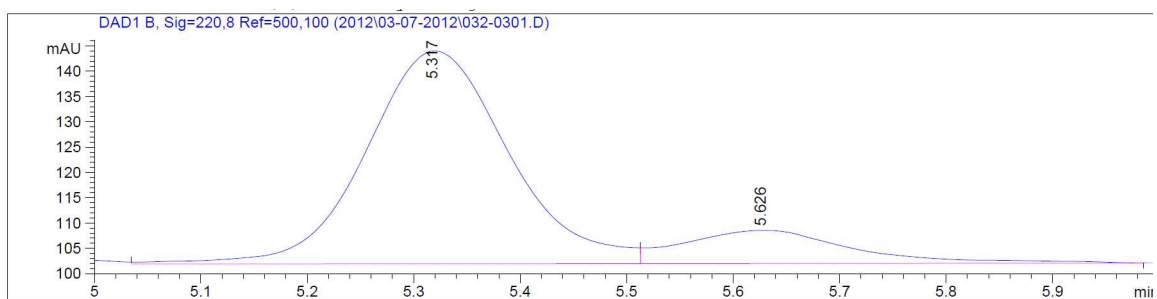

| Peak # | RetTime [min] | Type | Width [min] | Area [mAU*s] | Height [mAU] | Area %  |
|--------|---------------|------|-------------|--------------|--------------|---------|
| 1      | 5.317         | VV   | 0.1427      | 392.72311    | 42.14299     | 84.5432 |
| 2      | 5.626         | VV   | 0.1574      | 71.80025     | 6.57554      | 15.4568 |

Totals : 464.52337 48.71853

**(R)-4-methyl-1-phenyl-2-(thiophen-3-yl)pent-4-en-2-ol 12j**

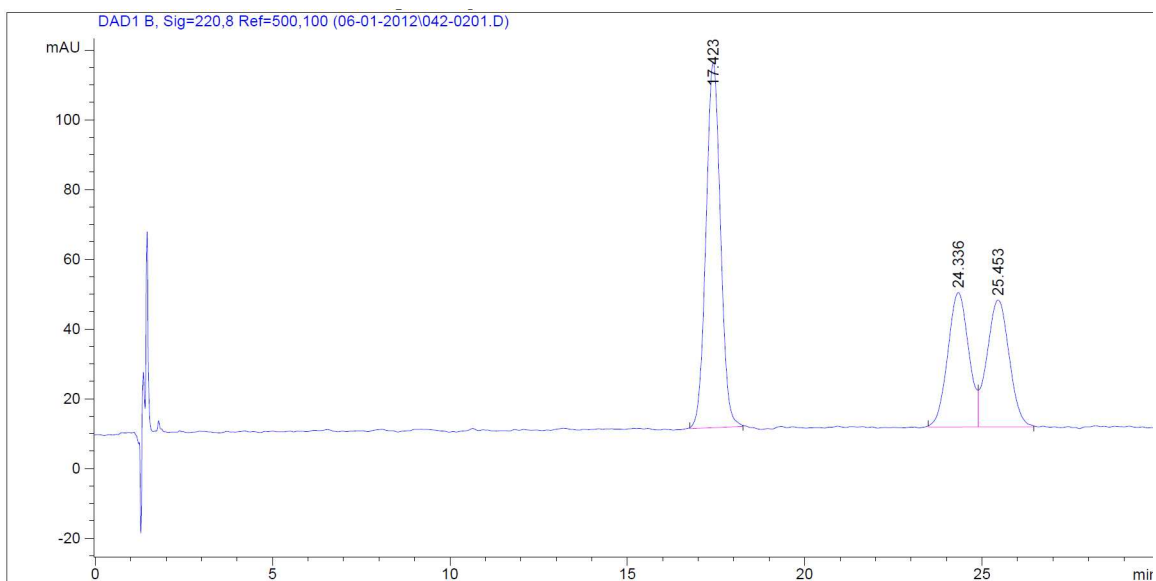

| Peak # | RetTime [min] | Type | Width [min] | Area [mAU*s] | Height [mAU] | Area %  |
|--------|---------------|------|-------------|--------------|--------------|---------|
| 1      | 17.423        | BB   | 0.4430      | 2975.52954   | 104.86835    | 48.3919 |
| 2      | 24.336        | BV   | 0.6237      | 1584.33020   | 38.53163     | 25.7664 |
| 3      | 25.453        | VB   | 0.6620      | 1588.95581   | 36.35072     | 25.8417 |

Totals : 6148.81555 179.75069

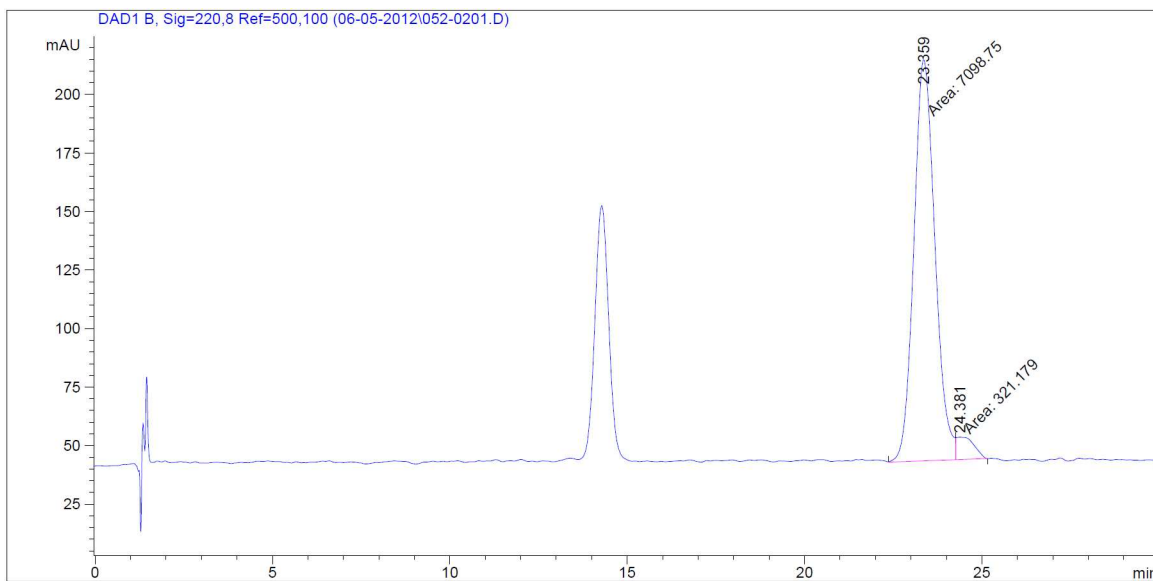

| Peak # | RetTime [min] | Type | Width [min] | Area [mAU*s] | Height [mAU] | Area %  |
|--------|---------------|------|-------------|--------------|--------------|---------|
| 1      | 23.359        | MF   | 0.6905      | 7098.75293   | 171.33400    | 95.6714 |
| 2      | 24.381        | FM   | 0.5581      | 321.17899    | 9.59143      | 4.3286  |

Totals : 7419.93192 180.92543

**(R)-4-Methyl-1-phenyl-2-(thiophen-3-yl)pent-4-en-2-ol 12k**

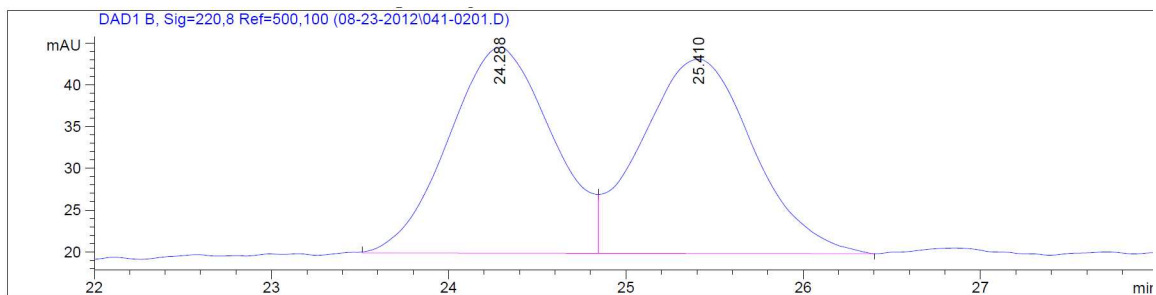

| Peak # | RetTime [min] | Type | Width [min] | Area [mAU*s] | Height [mAU] | Area %  |
|--------|---------------|------|-------------|--------------|--------------|---------|
| 1      | 24.288        | BV   | 0.6258      | 1001.28320   | 24.65535     | 49.4156 |
| 2      | 25.410        | VB   | 0.6621      | 1024.96594   | 23.25925     | 50.5844 |

Totals : 2026.24915 47.91460

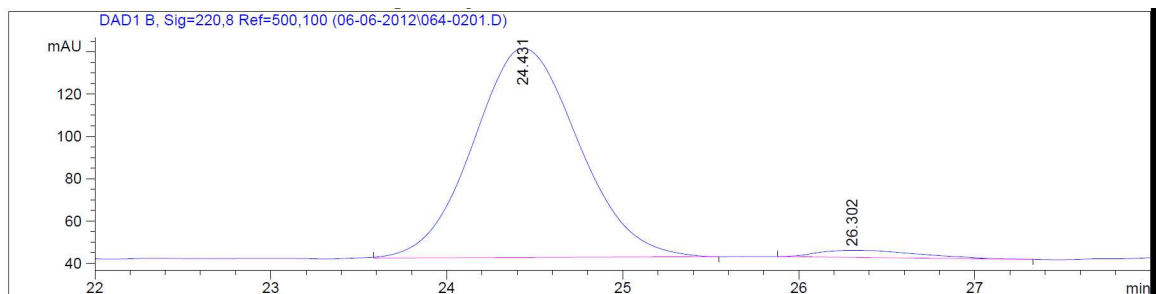

| Peak # | RetTime [min] | Type | Width [min] | Area [mAU*s] | Height [mAU] | Area %  |
|--------|---------------|------|-------------|--------------|--------------|---------|
| 1      | 24.431        | BB   | 0.6510      | 4120.61377   | 99.12616     | 96.8472 |
| 2      | 26.302        | BB   | 0.5441      | 134.14339    | 3.30112      | 3.1528  |

Totals : 4254.75716 102.42728

**(S)-5-Methyl-1,3-diphenylhex-5-en-3-ol 12l**

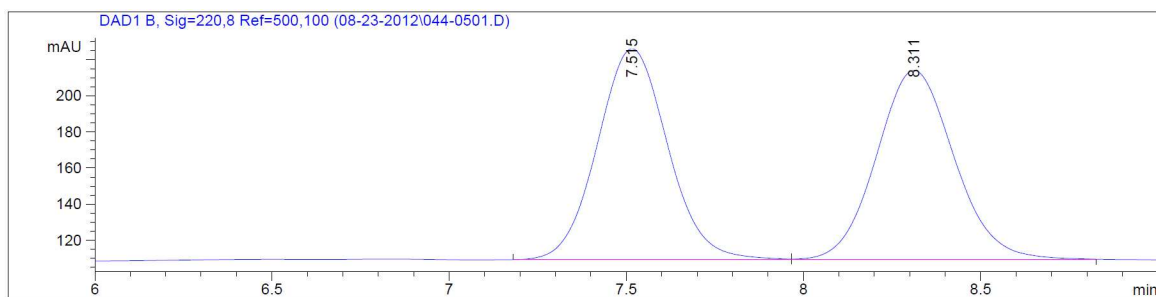

| Peak # | RetTime [min] | Type | Width [min] | Area [mAU*s] | Height [mAU] | Area %  |
|--------|---------------|------|-------------|--------------|--------------|---------|
| 1      | 7.515         | BV   | 0.2152      | 1614.78674   | 116.84342    | 50.1815 |
| 2      | 8.311         | VB   | 0.2364      | 1603.10864   | 104.83906    | 49.8185 |

Totals : 3217.89539 221.68248

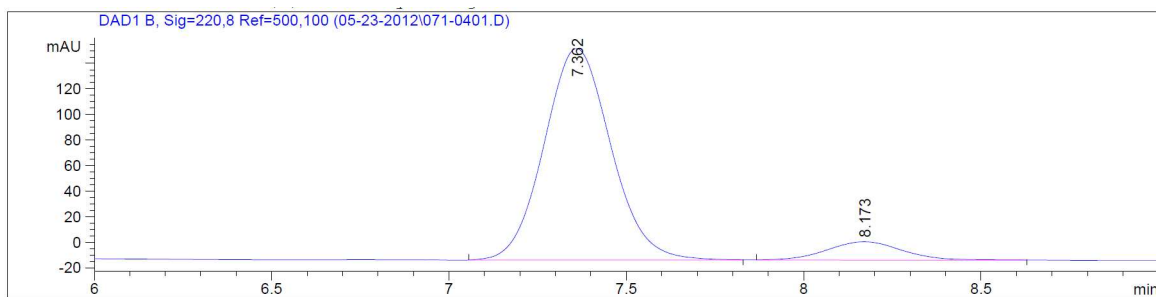

| Peak # | RetTime [min] | Type | Width [min] | Area [mAU*s] | Height [mAU] | Area %  |
|--------|---------------|------|-------------|--------------|--------------|---------|
| 1      | 7.362         | BB   | 0.2027      | 2165.67236   | 165.50398    | 90.9961 |
| 2      | 8.173         | BB   | 0.2322      | 214.28937    | 14.35128     | 9.0039  |

Totals : 2379.96173 179.85526

**(S)-2-methyl-4,7-diphenylhept-1-en-4-ol 12m**

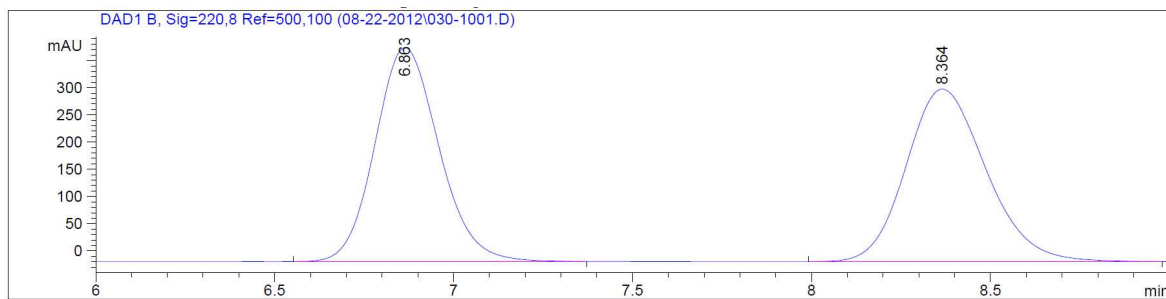

| Peak # | RetTime [min] | Type | Width [min] | Area [mAU*s] | Height [mAU] | Area %  |
|--------|---------------|------|-------------|--------------|--------------|---------|
| 1      | 6.863         | BB   | 0.1928      | 4886.65625   | 393.63443    | 49.7315 |
| 2      | 8.364         | BB   | 0.2395      | 4939.41992   | 317.44073    | 50.2685 |

Totals : 9826.07617 711.07516

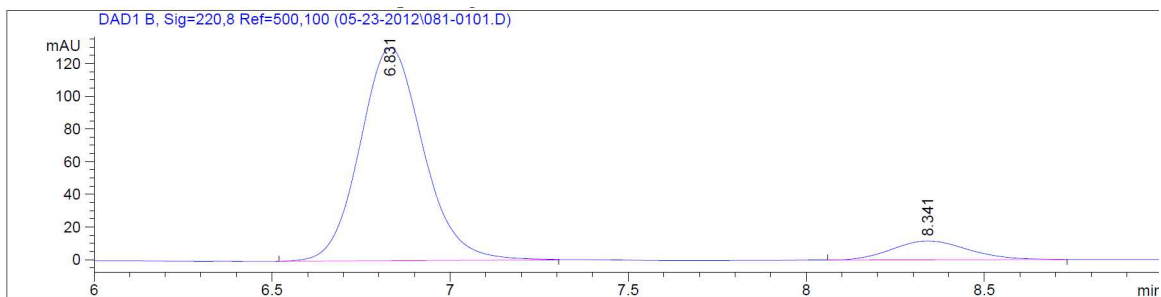

| Peak # | RetTime [min] | Type | Width [min] | Area [mAU*s] | Height [mAU] | Area %  |
|--------|---------------|------|-------------|--------------|--------------|---------|
| 1      | 6.831         | BB   | 0.1899      | 1609.17676   | 130.46039    | 90.2623 |
| 2      | 8.341         | BB   | 0.2329      | 173.60240    | 11.58259     | 9.7377  |

Totals : 1782.77916 142.04298



**(R)-1-(Benzyloxy)-4-methyl-2-phenylpent-4-en-2-ol 12n**

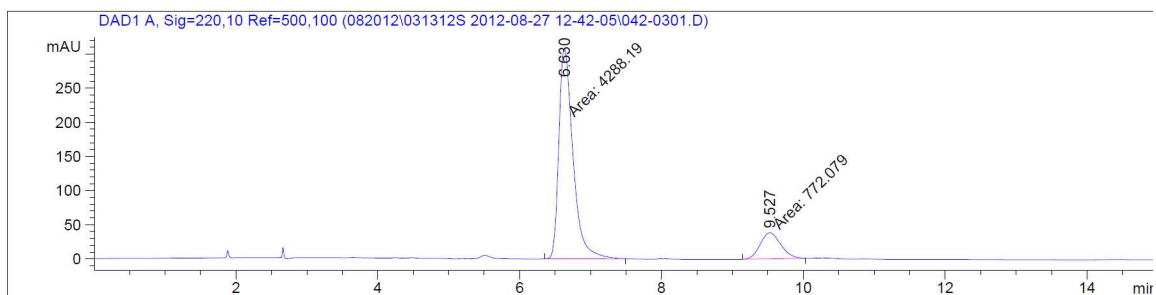

| Peak # | RetTime [min] | Type | Width [min] | Area [mAU*s] | Height [mAU] | Area %  |
|--------|---------------|------|-------------|--------------|--------------|---------|
| 1      | 6.630         | MM   | 0.2315      | 4288.18701   | 308.76804    | 84.7423 |
| 2      | 9.527         | MM   | 0.3362      | 772.07861    | 38.27243     | 15.2577 |

Totals : 5060.26562 347.04047

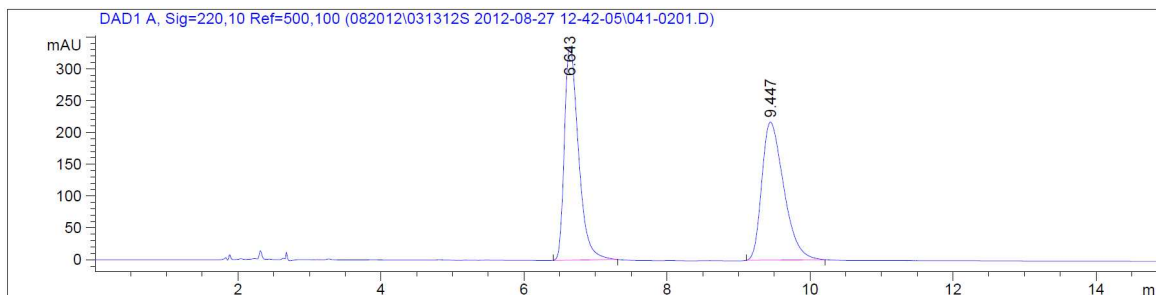

| Peak # | RetTime [min] | Type | Width [min] | Area [mAU*s] | Height [mAU] | Area %  |
|--------|---------------|------|-------------|--------------|--------------|---------|
| 1      | 6.643         | MM   | 0.2272      | 4575.40479   | 335.64401    | 49.7491 |
| 2      | 9.447         | MM   | 0.3554      | 4621.55811   | 216.74353    | 50.2509 |

Totals : 9196.96289 552.38754

**(S)-4-Methyl-2-phenylpent-4-en-2-ol 12o**

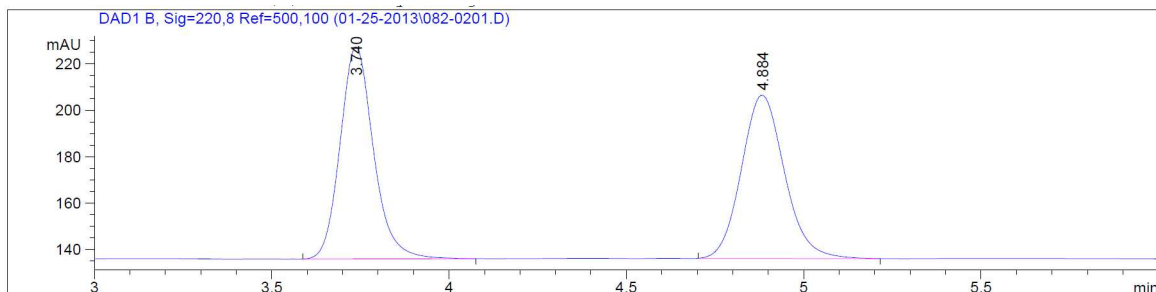

| Peak # | RetTime [min] | Type | Width [min] | Area [mAU*s] | Height [mAU] | Area %  |
|--------|---------------|------|-------------|--------------|--------------|---------|
| 1      | 3.740         | BB   | 0.1004      | 600.65021    | 91.68155     | 50.2221 |
| 2      | 4.884         | BB   | 0.1305      | 595.33752    | 70.51340     | 49.7779 |

Totals : 1195.98773 162.19495

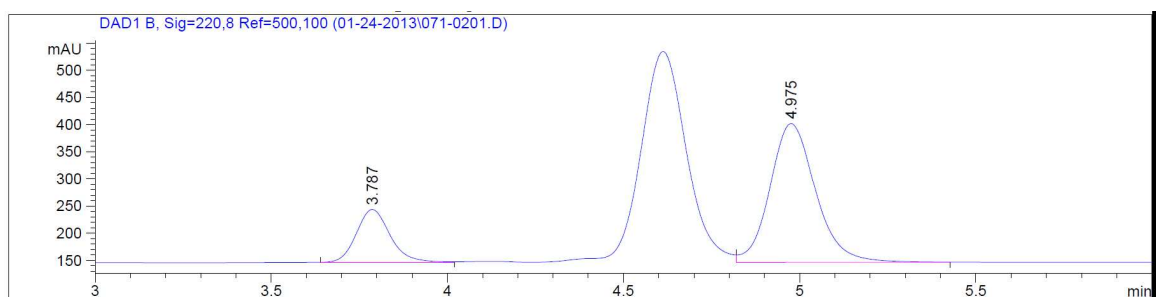

| Peak # | RetTime [min] | Type | Width [min] | Area [mAU*s] | Height [mAU] | Area %  |
|--------|---------------|------|-------------|--------------|--------------|---------|
| 1      | 3.787         | BV   | 0.1038      | 651.06793    | 97.62309     | 22.0325 |
| 2      | 4.975         | VB   | 0.1372      | 2303.97070   | 255.51031    | 77.9675 |

Totals : 2955.03864 353.13340

**(R)-tert-Butyl 3-hydroxy-5-methyl-3-phenylhex-5-enoate 12p**

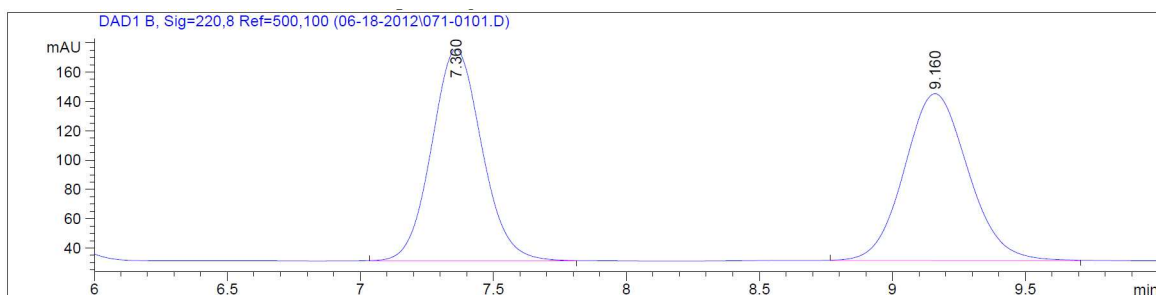

| Peak # | RetTime [min] | Type | Width [min] | Area [mAU*s] | Height [mAU] | Area %  |
|--------|---------------|------|-------------|--------------|--------------|---------|
| 1      | 7.360         | BB   | 0.2033      | 1896.80212   | 144.35103    | 49.9853 |
| 2      | 9.160         | BB   | 0.2586      | 1897.91858   | 113.80959    | 50.0147 |

Totals : 3794.72070 258.16062

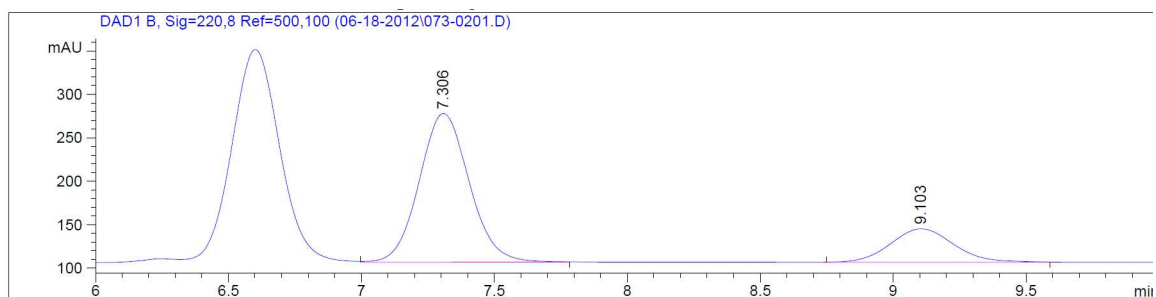

| Peak # | RetTime [min] | Type | Width [min] | Area [mAU*s] | Height [mAU] | Area %  |
|--------|---------------|------|-------------|--------------|--------------|---------|
| 1      | 7.306         | VB   | 0.2027      | 2240.48779   | 171.14331    | 77.7966 |
| 2      | 9.103         | BB   | 0.2558      | 639.44269    | 38.49627     | 22.2034 |

Totals : 2879.93048 209.63958

**(R)-tert-butyl 4-(6-(2-methylallyl)-2-oxo-6-phenyl-1,3-oxazinan-3-yl)piperidine-1-carboxylate 1**

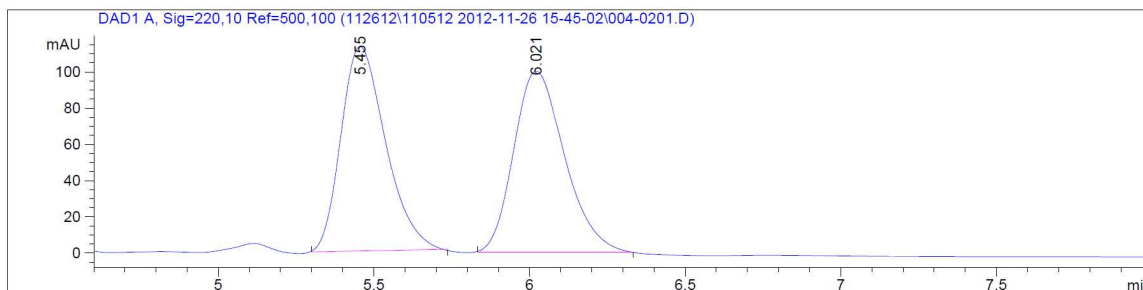

| Peak # | RetTime [min] | Type | Width [min] | Area [mAU*s] | Height [mAU] | Area %  |
|--------|---------------|------|-------------|--------------|--------------|---------|
| 1      | 5.455         | MM   | 0.1660      | 1125.76025   | 112.99730    | 49.9209 |
| 2      | 6.021         | MM   | 0.1884      | 1129.32776   | 99.87939     | 50.0791 |

Totals : 2255.08801 212.87669

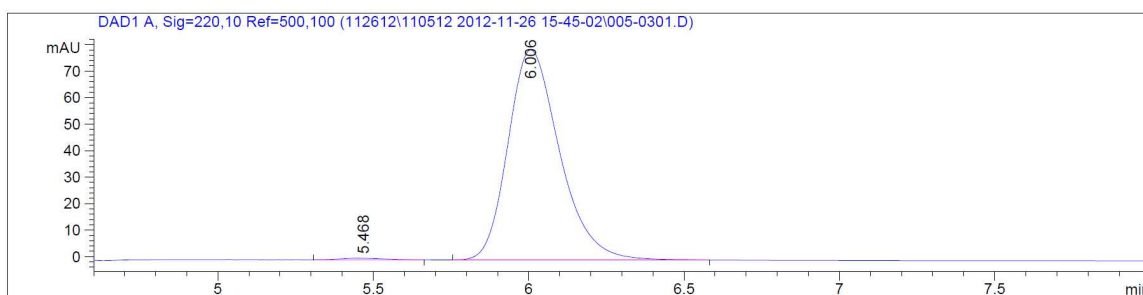

| Peak # | RetTime [min] | Type | Width [min] | Area [mAU*s] | Height [mAU] | Area %  |
|--------|---------------|------|-------------|--------------|--------------|---------|
| 1      | 5.468         | MM   | 0.1582      | 5.86168      | 6.17572e-1   | 0.6366  |
| 2      | 6.006         | MM   | 0.1923      | 914.86511    | 79.28283     | 99.3634 |

Totals : 920.72680 79.90040

**(R)-4-Methylene-1,2-diphenylhexan-2-ol 16**

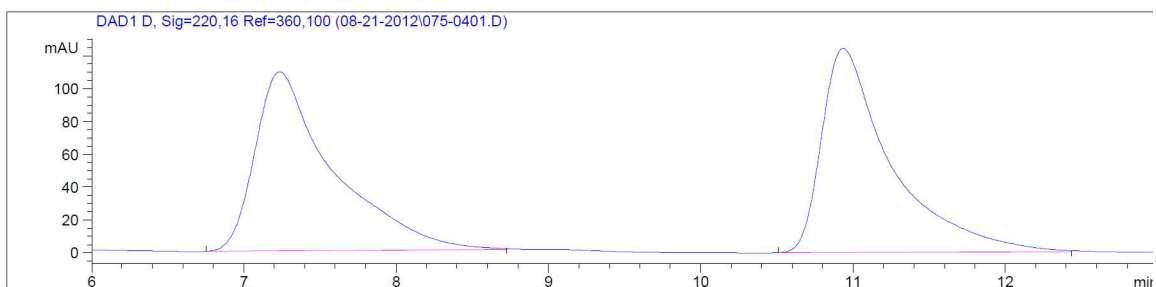

| Peak # | RetTime [min] | Type | Width [min] | Area [mAU*s] | Height [mAU] | Area %  |
|--------|---------------|------|-------------|--------------|--------------|---------|
| 1      | 7.233         | BB   | 0.4989      | 3884.16479   | 109.21716    | 49.6043 |
| 2      | 10.934        | BB   | 0.4541      | 3946.13037   | 124.38062    | 50.3957 |

Totals : 7830.29517 233.59777

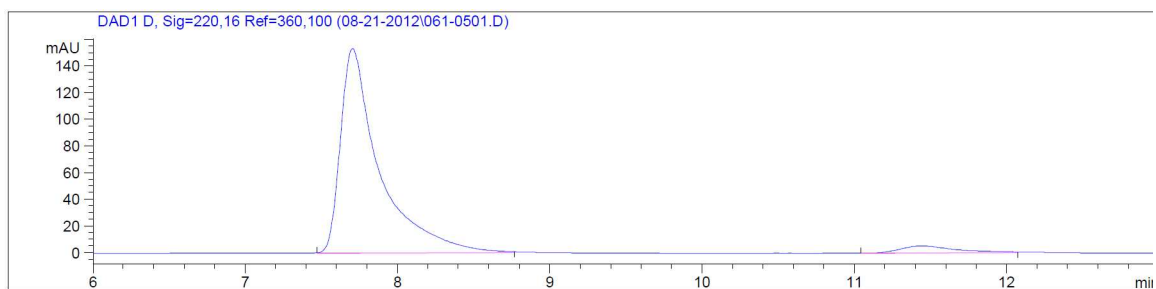

| Peak # | RetTime [min] | Type | Width [min] | Area [mAU*s] | Height [mAU] | Area %  |
|--------|---------------|------|-------------|--------------|--------------|---------|
| 1      | 7.709         | BB   | 0.2512      | 2725.96973   | 153.45779    | 95.4457 |
| 2      | 11.447        | BB   | 0.3722      | 130.07387    | 5.22889      | 4.5543  |

Totals : 2856.04359 158.68668

**(R)-4-Methylene-1,2-diphenyloctan-2-ol 17**

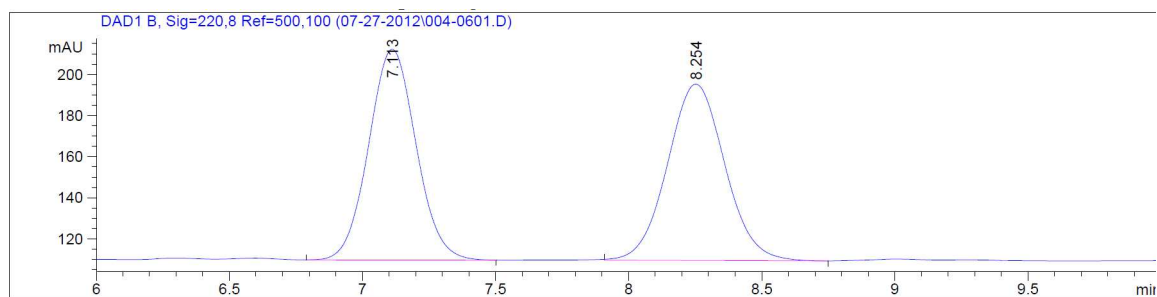

| Peak # | RetTime [min] | Type | Width [min] | Area [mAU*s] | Height [mAU] | Area %  |
|--------|---------------|------|-------------|--------------|--------------|---------|
| 1      | 7.113         | VB   | 0.1924      | 1268.09448   | 102.46413    | 49.6507 |
| 2      | 8.254         | BB   | 0.2329      | 1285.93921   | 85.75674     | 50.3493 |

Totals : 2554.03369 188.22087

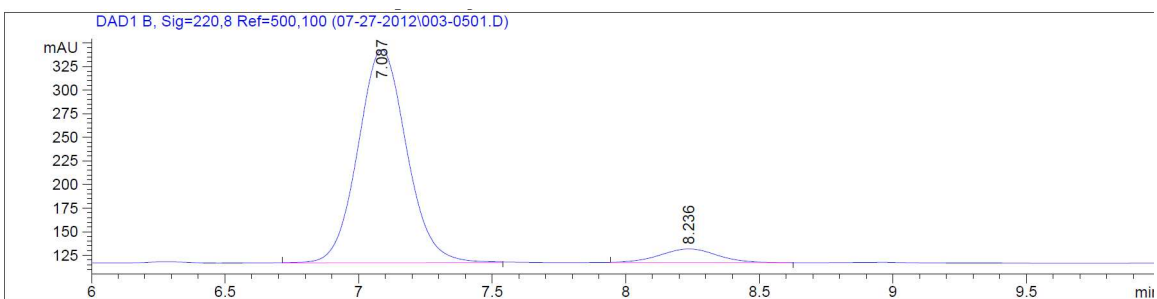

| Peak # | RetTime [min] | Type | Width [min] | Area [mAU*s] | Height [mAU] | Area %  |
|--------|---------------|------|-------------|--------------|--------------|---------|
| 1      | 7.087         | BB   | 0.1952      | 2845.49854   | 225.58667    | 93.0212 |
| 2      | 8.236         | BB   | 0.2288      | 213.47958    | 14.41169     | 6.9788  |

Totals : 3058.97812 239.99836

## X-Ray Crystallographic Data for Compound 7

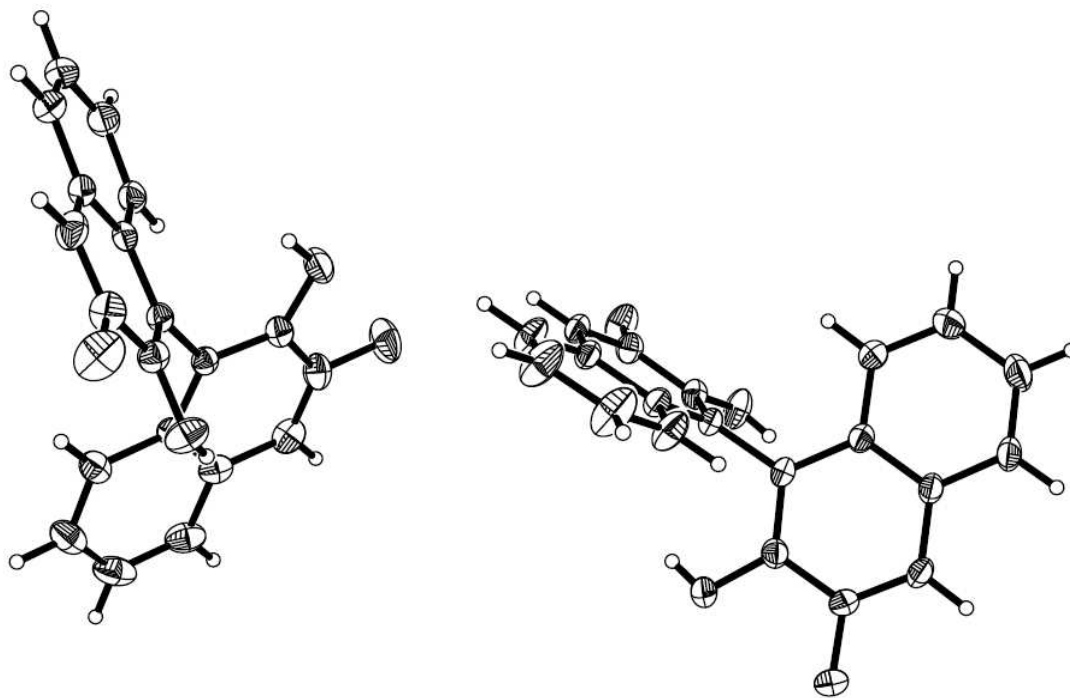

Figure 1. ORTEP (50% probability level) diagram of asymmetric unit of 7 expanded to show the full fragments.

**Table 1.** Crystal data and structure refinement for **7**.

|                                   |                                                               |           |
|-----------------------------------|---------------------------------------------------------------|-----------|
| Identification code               | 3,3'-F <sub>2</sub> -BINOL                                    |           |
| Empirical formula                 | C <sub>20</sub> H <sub>12</sub> F <sub>2</sub> O <sub>2</sub> |           |
| Formula weight                    | 322.30                                                        |           |
| Temperature                       | 173(2) K                                                      |           |
| Wavelength                        | 0.71073 Å                                                     |           |
| Crystal system                    | Hexagonal                                                     |           |
| Space group                       | P3(2)21                                                       |           |
| Unit cell dimensions              | a = 10.6787(7) Å                                              | α = 90°.  |
|                                   | b = 10.6787(7) Å                                              | β = 90°.  |
|                                   | c = 23.2221(15) Å                                             | γ = 120°. |
| Volume                            | 2293.3(3) Å <sup>3</sup>                                      |           |
| Z                                 | 6                                                             |           |
| Density (calculated)              | 1.400 Mg/m <sup>3</sup>                                       |           |
| Absorption coefficient            | 0.106 mm <sup>-1</sup>                                        |           |
| F(000)                            | 996                                                           |           |
| Crystal size                      | 0.32 x 0.26 x 0.24 mm <sup>3</sup>                            |           |
| Theta range for data collection   | 2.20 to 28.80°.                                               |           |
| Index ranges                      | -14 ≤ h ≤ 14, -14 ≤ k ≤ 14, -30 ≤ l ≤ 31                      |           |
| Reflections collected             | 24741                                                         |           |
| Independent reflections           | 3825 [R(int) = 0.0253]                                        |           |
| Completeness to theta = 28.80°    | 96.9 %                                                        |           |
| Absorption correction             | Semi-empirical from equivalents                               |           |
| Max. and min. transmission        | 0.9750 and 0.9668                                             |           |
| Refinement method                 | Full-matrix least-squares on F <sup>2</sup>                   |           |
| Data / restraints / parameters    | 3825 / 0 / 222                                                |           |
| Goodness-of-fit on F <sup>2</sup> | 1.038                                                         |           |
| Final R indices [I > 2σ(I)]       | R1 = 0.0347, wR2 = 0.1079                                     |           |
| R indices (all data)              | R1 = 0.0391, wR2 = 0.1215                                     |           |
| Absolute structure parameter      | 0.8(6)                                                        |           |
| Largest diff. peak and hole       | 0.267 and -0.226 e.Å <sup>-3</sup>                            |           |



**Table 2.** Atomic coordinates (  $\times 10^4$ ) and equivalent isotropic displacement parameters ( $\text{\AA}^2 \times 10^3$ ) for 7. U(eq) is defined as one third of the trace of the orthogonalized  $U^{ij}$  tensor.

|        | x        | y       | z        | U(eq) |
|--------|----------|---------|----------|-------|
| F(23)  | 4952(1)  | 8248(1) | 1064(1)  | 39(1) |
| O(22)  | 6384(1)  | 6915(1) | 856(1)   | 35(1) |
| C(21)  | 4813(1)  | 5611(1) | 55(1)    | 22(1) |
| C(24)  | 3364(2)  | 7159(1) | 286(1)   | 25(1) |
| C(29)  | 3614(1)  | 5377(2) | -293(1)  | 24(1) |
| C(210) | 2889(2)  | 6169(2) | -180(1)  | 24(1) |
| C(22)  | 5251(1)  | 6593(1) | 499(1)   | 25(1) |
| C(25)  | 1725(2)  | 5950(2) | -536(1)  | 35(1) |
| C(26)  | 1288(2)  | 4993(2) | -984(1)  | 48(1) |
| C(28)  | 3122(2)  | 4383(2) | -758(1)  | 35(1) |
| C(23)  | 4491(2)  | 7335(1) | 611(1)   | 26(1) |
| C(27)  | 1988(2)  | 4196(2) | -1092(1) | 48(1) |
| O(12)  | 8211(1)  | 60(1)   | 742(1)   | 34(1) |
| F(13)  | 9544(1)  | 2700(1) | 338(1)   | 46(1) |
| C(18)  | 11614(1) | 1667(2) | 2365(1)  | 28(1) |
| C(11)  | 9864(1)  | 749(1)  | 1550(1)  | 21(1) |
| C(12)  | 9355(1)  | 1045(2) | 1050(1)  | 25(1) |
| C(19)  | 11070(1) | 1896(1) | 1841(1)  | 23(1) |
| C(14)  | 11196(2) | 3588(2) | 1097(1)  | 31(1) |
| C(15)  | 12886(2) | 4476(2) | 1924(1)  | 35(1) |
| C(13)  | 10064(2) | 2473(2) | 835(1)   | 31(1) |
| C(110) | 11731(1) | 3332(1) | 1620(1)  | 27(1) |
| C(17)  | 12718(2) | 2805(2) | 2656(1)  | 35(1) |
| C(16)  | 13362(2) | 4214(2) | 2434(1)  | 40(1) |

**Table 3.** Bond lengths [Å] and angles [°] for **7**. Symmetry transformations used to generate equivalent atoms: #1 y,x,-z #2 x-y,-y,-z+1/3

|               |            |                     |            |
|---------------|------------|---------------------|------------|
| F(23)-C(23)   | 1.3484(14) | C(22)-O(22)-H(22)   | 107.4(16)  |
| O(22)-C(22)   | 1.3613(16) | C(22)-C(21)-C(29)   | 119.42(11) |
| O(22)-H(22)   | 0.76(2)    | C(22)-C(21)-C(21)#1 | 119.19(11) |
| C(21)-C(22)   | 1.3759(17) | C(29)-C(21)-C(21)#1 | 121.39(11) |
| C(21)-C(29)   | 1.4263(17) | C(23)-C(24)-C(210)  | 119.47(11) |
| C(21)-C(21)#1 | 1.498(2)   | C(23)-C(24)-H(24)   | 120.3      |
| C(24)-C(23)   | 1.3520(19) | C(210)-C(24)-H(24)  | 120.3      |
| C(24)-C(210)  | 1.4172(17) | C(28)-C(29)-C(21)   | 121.74(11) |
| C(24)-H(24)   | 0.9500     | C(28)-C(29)-C(210)  | 118.41(11) |
| C(29)-C(28)   | 1.4192(18) | C(21)-C(29)-C(210)  | 119.84(11) |
| C(29)-C(210)  | 1.4275(17) | C(25)-C(210)-C(24)  | 121.83(12) |
| C(210)-C(25)  | 1.4110(17) | C(25)-C(210)-C(29)  | 119.20(12) |
| C(22)-C(23)   | 1.4137(18) | C(24)-C(210)-C(29)  | 118.97(11) |
| C(25)-C(26)   | 1.366(2)   | O(22)-C(22)-C(21)   | 124.74(12) |
| C(25)-H(25)   | 0.9500     | O(22)-C(22)-C(23)   | 115.66(11) |
| C(26)-C(27)   | 1.407(2)   | C(21)-C(22)-C(23)   | 119.59(11) |
| C(26)-H(26)   | 0.9500     | C(26)-C(25)-C(210)  | 120.85(13) |
| C(28)-C(27)   | 1.366(2)   | C(26)-C(25)-H(25)   | 119.6      |
| C(28)-H(28)   | 0.9500     | C(210)-C(25)-H(25)  | 119.6      |
| C(27)-H(27)   | 0.9500     | C(25)-C(26)-C(27)   | 120.11(14) |
| O(12)-C(12)   | 1.3506(16) | C(25)-C(26)-H(26)   | 119.9      |
| O(12)-H(12)   | 0.8400     | C(27)-C(26)-H(26)   | 119.9      |
| F(13)-C(13)   | 1.3536(15) | C(27)-C(28)-C(29)   | 120.67(13) |
| C(18)-C(17)   | 1.376(2)   | C(27)-C(28)-H(28)   | 119.7      |
| C(18)-C(19)   | 1.4200(17) | C(29)-C(28)-H(28)   | 119.7      |
| C(18)-H(18)   | 0.9500     | F(23)-C(23)-C(24)   | 120.96(11) |
| C(11)-C(12)   | 1.3844(17) | F(23)-C(23)-C(22)   | 116.37(11) |
| C(11)-C(19)   | 1.4279(17) | C(24)-C(23)-C(22)   | 122.67(11) |
| C(11)-C(11)#2 | 1.488(2)   | C(28)-C(27)-C(26)   | 120.74(14) |
| C(12)-C(13)   | 1.4123(19) | C(28)-C(27)-H(27)   | 119.6      |
| C(19)-C(110)  | 1.4247(18) | C(26)-C(27)-H(27)   | 119.6      |
| C(14)-C(13)   | 1.345(2)   | C(12)-O(12)-H(12)   | 109.5      |
| C(14)-C(110)  | 1.4264(19) | C(17)-C(18)-C(19)   | 120.85(14) |
| C(14)-H(14)   | 0.9500     | C(17)-C(18)-H(18)   | 119.6      |
| C(15)-C(16)   | 1.370(2)   | C(19)-C(18)-H(18)   | 119.6      |
| C(15)-C(110)  | 1.4161(19) | C(12)-C(11)-C(19)   | 119.36(11) |
| C(15)-H(15)   | 0.9500     | C(12)-C(11)-C(11)#2 | 119.29(12) |
| C(17)-C(16)   | 1.404(3)   | C(19)-C(11)-C(11)#2 | 121.33(11) |
| C(17)-H(17)   | 0.9500     | O(12)-C(12)-C(11)   | 124.90(12) |
| C(16)-H(16)   | 0.9500     | O(12)-C(12)-C(13)   | 116.20(12) |
|               |            | C(11)-C(12)-C(13)   | 118.90(12) |
|               |            | C(18)-C(19)-C(110)  | 117.95(12) |
|               |            | C(18)-C(19)-C(11)   | 121.88(12) |
|               |            | C(110)-C(19)-C(11)  | 120.12(11) |
|               |            | C(13)-C(14)-C(110)  | 119.00(12) |
|               |            | C(13)-C(14)-H(14)   | 120.5      |
|               |            | C(110)-C(14)-H(14)  | 120.5      |
|               |            | C(16)-C(15)-C(110)  | 120.43(14) |
|               |            | C(16)-C(15)-H(15)   | 119.8      |
|               |            | C(110)-C(15)-H(15)  | 119.8      |
|               |            | C(14)-C(13)-F(13)   | 119.65(12) |
|               |            | C(14)-C(13)-C(12)   | 123.72(12) |
|               |            | F(13)-C(13)-C(12)   | 116.62(12) |
|               |            | C(15)-C(110)-C(19)  | 119.85(12) |
|               |            | C(15)-C(110)-C(14)  | 121.29(13) |
|               |            | C(19)-C(110)-C(14)  | 118.85(12) |
|               |            | C(18)-C(17)-C(16)   | 120.63(14) |
|               |            | C(18)-C(17)-H(17)   | 119.7      |
|               |            | C(16)-C(17)-H(17)   | 119.7      |
|               |            | C(15)-C(16)-C(17)   | 120.25(13) |
|               |            | C(15)-C(16)-H(16)   | 119.9      |
|               |            | C(17)-C(16)-H(16)   | 119.9      |

**Table 4.** Anisotropic displacement parameters ( $\text{\AA}^2 \times 10^3$ ) for **7**. The anisotropic displacement factor exponent takes the form:  $-2\pi^2 [h^2 a^{*2} U^{11} + \dots + 2 h k a^* b^* U^{12}]$

|        | $U^{11}$ | $U^{22}$ | $U^{33}$ | $U^{23}$ | $U^{13}$ | $U^{12}$ |
|--------|----------|----------|----------|----------|----------|----------|
| F(23)  | 46(1)    | 38(1)    | 41(1)    | -19(1)   | -14(1)   | 28(1)    |
| O(22)  | 35(1)    | 35(1)    | 44(1)    | -13(1)   | -17(1)   | 24(1)    |
| C(21)  | 22(1)    | 23(1)    | 26(1)    | 2(1)     | 1(1)     | 15(1)    |
| C(24)  | 29(1)    | 27(1)    | 28(1)    | 0(1)     | 2(1)     | 20(1)    |
| C(29)  | 25(1)    | 28(1)    | 25(1)    | -1(1)    | -1(1)    | 17(1)    |
| C(210) | 26(1)    | 32(1)    | 23(1)    | 1(1)     | 0(1)     | 20(1)    |
| C(22)  | 24(1)    | 23(1)    | 28(1)    | 0(1)     | -4(1)    | 12(1)    |
| C(25)  | 36(1)    | 56(1)    | 30(1)    | -8(1)    | -7(1)    | 36(1)    |
| C(26)  | 48(1)    | 82(1)    | 36(1)    | -21(1)   | -20(1)   | 48(1)    |
| C(28)  | 37(1)    | 45(1)    | 36(1)    | -15(1)   | -9(1)    | 29(1)    |
| C(23)  | 29(1)    | 22(1)    | 27(1)    | -4(1)    | -2(1)    | 14(1)    |
| C(27)  | 51(1)    | 70(1)    | 41(1)    | -30(1)   | -22(1)   | 43(1)    |
| O(12)  | 33(1)    | 30(1)    | 35(1)    | 2(1)     | -13(1)   | 13(1)    |
| F(13)  | 47(1)    | 44(1)    | 43(1)    | 17(1)    | -10(1)   | 20(1)    |
| C(18)  | 22(1)    | 37(1)    | 26(1)    | -3(1)    | 0(1)     | 15(1)    |
| C(11)  | 20(1)    | 23(1)    | 21(1)    | 0(1)     | 1(1)     | 12(1)    |
| C(12)  | 24(1)    | 28(1)    | 26(1)    | 0(1)     | -2(1)    | 14(1)    |
| C(19)  | 20(1)    | 27(1)    | 22(1)    | -2(1)    | 4(1)     | 12(1)    |
| C(14)  | 28(1)    | 25(1)    | 38(1)    | 7(1)     | 8(1)     | 12(1)    |
| C(15)  | 29(1)    | 26(1)    | 42(1)    | -6(1)    | 6(1)     | 8(1)     |
| C(13)  | 32(1)    | 35(1)    | 29(1)    | 8(1)     | 0(1)     | 19(1)    |
| C(110) | 23(1)    | 25(1)    | 29(1)    | -1(1)    | 7(1)     | 10(1)    |
| C(17)  | 27(1)    | 49(1)    | 28(1)    | -8(1)    | -3(1)    | 18(1)    |
| C(16)  | 27(1)    | 44(1)    | 39(1)    | -17(1)   | -2(1)    | 11(1)    |

**Table 5.** Hydrogen-bond geometry ( $\text{\AA}$ ,  $^\circ$ ).

| D - H $\cdots$ A           | D - H | H $\cdots$ A | D $\cdots$ A | D - H $\cdots$ A |
|----------------------------|-------|--------------|--------------|------------------|
| O(1)-H(1A) $\cdots$ O(2)   | 0.84  | 2.19         | 2.942(2)     | 149              |
| O(2)-H(2A) $\cdots$ O(1)   | 0.84  | 2.11         | 2.942(2)     | 171              |
| O(14)-H(14A) $\cdots$ F(2) | 0.95  | 2.49         | 3.232(3)     | 134              |
